# Supplementary material
Source: publisher figshare collection journal article supplement (https://acs.figshare.com/ndownloader/files/4010899)
Supplement: Supplementary file 1 [file 4010899]

 
data_1-Me2F4
 
_audit_creation_method            SHELXL-97
_chemical_name_systematic
;
 ?
;
_chemical_name_common             ?
_chemical_melting_point           ?
_chemical_formula_moiety          'C12 H14 Fe, C12 F4 N4'
_chemical_formula_sum
 'C24 H14 F4 Fe N4'
_chemical_formula_weight          490.24
 
loop_
 _atom_type_symbol
 _atom_type_description
 _atom_type_scat_dispersion_real
 _atom_type_scat_dispersion_imag
 _atom_type_scat_source
 'C'  'C'   0.0033   0.0016
 'International Tables Vol C Tables 4.2.6.8 and 6.1.1.4'
 'H'  'H'   0.0000   0.0000
 'International Tables Vol C Tables 4.2.6.8 and 6.1.1.4'
 'F'  'F'   0.0171   0.0103
 'International Tables Vol C Tables 4.2.6.8 and 6.1.1.4'
 'Fe'  'Fe'   0.3463   0.8444
 'International Tables Vol C Tables 4.2.6.8 and 6.1.1.4'
 'N'  'N'   0.0061   0.0033
 'International Tables Vol C Tables 4.2.6.8 and 6.1.1.4'
 
_symmetry_cell_setting           'Monoclinic'
_symmetry_space_group_name_H-M   'P 21/c'
_symmetry_space_group_name_Hall    '-P 2ybc'

loop_
 _symmetry_equiv_pos_as_xyz
 'x, y, z'
 '-x, y+1/2, -z+1/2'
 '-x, -y, -z'
 'x, -y-1/2, z-1/2'
 
_cell_length_a                    6.8456(5)
_cell_length_b                    14.4051(10)
_cell_length_c                    20.8910(14)
_cell_angle_alpha                 90.00
_cell_angle_beta                  103.566(3)
_cell_angle_gamma                 90.00
_cell_volume                      2002.6(2)
_cell_formula_units_Z             4
_cell_measurement_temperature     173
_cell_measurement_reflns_used     6963
_cell_measurement_theta_min       2.45
_cell_measurement_theta_max       28.30
_exptl_crystal_description        'prism'
_exptl_crystal_colour             'black'
_exptl_crystal_size_max           0.75
_exptl_crystal_size_mid           0.13
_exptl_crystal_size_min           0.13
_exptl_crystal_density_meas       ?
_exptl_crystal_density_diffrn     1.626
_exptl_crystal_density_method     'not measured'
_exptl_crystal_F_000              992
_exptl_absorpt_coefficient_mu     0.811
_exptl_absorpt_correction_type    empirical
_exptl_absorpt_correction_T_min   0.5815
_exptl_absorpt_correction_T_max   0.9019
_exptl_absorpt_process_details    
;
SADABS Sheldrick 1996
;
_exptl_special_details
;
 ?
;
 
_diffrn_ambient_temperature       173
_diffrn_radiation_wavelength      0.71073
_diffrn_radiation_type            MoK\a
_diffrn_radiation_source          'Bruker TXS fine-focus rotating anode' 
_diffrn_radiation_monochromator   'Bruker Helios multilayer confocal mirror' 
_diffrn_measurement_device_type   'Bruker APEXII CCD area detector' 
_diffrn_measurement_method        'phi and omega scans' 
_diffrn_detector_area_resol_mean  8.333
_diffrn_standards_number          ?
_diffrn_standards_interval_count  ?
_diffrn_standards_interval_time   ?
_diffrn_standards_decay_%         ?
_diffrn_reflns_number             14438
_diffrn_reflns_av_R_equivalents   0.0198
_diffrn_reflns_av_unetI/netI     0.0236
_diffrn_reflns_limit_h_min        -9
_diffrn_reflns_limit_h_max        9
_diffrn_reflns_limit_k_min        -19
_diffrn_reflns_limit_k_max        19
_diffrn_reflns_limit_l_min        -27
_diffrn_reflns_limit_l_max        15
_diffrn_reflns_theta_min          1.73
_diffrn_reflns_theta_max          28.40
_reflns_number_total              4961
_reflns_number_gt                 4490
_reflns_threshold_expression      >2\s(I)
 
_computing_data_collection        'APEX2 (Bruker AXS, 2006)'
_computing_cell_refinement        'APEX2 (Bruker AXS, 2006)'
_computing_data_reduction         'SAINT (Bruker AXS, 2004)'
_computing_structure_solution     'SHELXS-97 (Sheldrick, 1997)'
_computing_structure_refinement   'SHELXL-97 (Sheldrick, 1997)'
_computing_molecular_graphics     'XSHEL (Bruker AXS,2002)'
_computing_publication_material   'XCIF (Bruker AXS, 2001)' 
_refine_special_details
;
 Refinement of F^2^ against ALL reflections.  The weighted R-factor wR and
 goodness of fit S are based on F^2^, conventional R-factors R are based
 on F, with F set to zero for negative F^2^. The threshold expression of
 F^2^ > 2\s(F^2^) is used only for calculating R-factors(gt) etc. and is
 not relevant to the choice of reflections for refinement.  R-factors based
 on F^2^ are statistically about twice as large as those based on F, and R-
 factors based on ALL data will be even larger.
 During the refinement, the restraint commands 'SAME' was also used to refine 
 the distances of C-C bonds in the disorder of Cp rings. 
 The restraint command 'SIMU' and 'ISOR' were also used to refine the non-H 
 atoms with NPD and ADP problems. These atoms are as follows: C2A C2B C4A 
 C4B C5A C5B C7A C7B C8A C8B C9A C10A
;
 
_refine_ls_structure_factor_coef  Fsqd
_refine_ls_matrix_type            full
_refine_ls_weighting_scheme       calc
_refine_ls_weighting_details
 'calc w=1/[\s^2^(Fo^2^)+(0.0492P)^2^+3.0676P] where P=(Fo^2^+2Fc^2^)/3'
_atom_sites_solution_primary      direct
_atom_sites_solution_secondary    difmap
_atom_sites_solution_hydrogens    geom
_refine_ls_hydrogen_treatment     constr

_refine_ls_extinction_method      none
_refine_ls_extinction_coef        ?
_refine_ls_number_reflns          4961
_refine_ls_number_parameters      397
_refine_ls_number_restraints      246
_refine_ls_R_factor_all           0.0514
_refine_ls_R_factor_gt            0.0474
_refine_ls_wR_factor_ref          0.1342
_refine_ls_wR_factor_gt           0.1320
_refine_ls_goodness_of_fit_ref    1.231
_refine_ls_restrained_S_all       1.206
_refine_ls_shift/su_max           0.003
_refine_ls_shift/su_mean          0.000
 
loop_
 _atom_site_label
 _atom_site_type_symbol
 _atom_site_fract_x
 _atom_site_fract_y
 _atom_site_fract_z
 _atom_site_U_iso_or_equiv
 _atom_site_adp_type
 _atom_site_occupancy
 _atom_site_symmetry_multiplicity
 _atom_site_calc_flag
 _atom_site_refinement_flags
 _atom_site_disorder_assembly
 _atom_site_disorder_group
C1A C 0.785(3) 0.4421(7) 0.2792(4) 0.023(2) Uani 0.503(5) 1 d PD A 1
H1A H 0.7509 0.4072 0.2395 0.027 Uiso 0.503(5) 1 calc PR A 1
C2A C 0.831(3) 0.4050(9) 0.3439(5) 0.027(2) Uani 0.503(5) 1 d PDU A 1
H2A H 0.8355 0.3412 0.3555 0.033 Uiso 0.503(5) 1 calc PR A 1
C3A C 0.869(5) 0.4814(11) 0.3881(9) 0.027(3) Uani 0.503(5) 1 d PD A 1
H3A H 0.8979 0.4771 0.4347 0.033 Uiso 0.503(5) 1 calc PR A 1
C4A C 0.855(6) 0.5652(14) 0.3514(8) 0.023(3) Uani 0.503(5) 1 d PDU A 1
H4A H 0.8802 0.6261 0.3688 0.028 Uiso 0.503(5) 1 calc PR A 1
C5A C 0.798(4) 0.5402(7) 0.2839(8) 0.0220(18) Uani 0.503(5) 1 d PDU A 1
C6A C 0.7753(8) 0.6102(4) 0.2308(2) 0.0239(11) Uani 0.503(5) 1 d P A 1
H6A1 H 0.7366 0.5793 0.1879 0.036 Uiso 0.503(5) 1 calc PR A 1
H6A2 H 0.9030 0.6429 0.2344 0.036 Uiso 0.503(5) 1 calc PR A 1
H6A3 H 0.6710 0.6549 0.2350 0.036 Uiso 0.503(5) 1 calc PR A 1
C1B C 0.781(3) 0.4634(8) 0.2684(5) 0.022(2) Uani 0.497(5) 1 d PD A 2
H1B H 0.7432 0.4407 0.2246 0.027 Uiso 0.497(5) 1 calc PR A 2
C2B C 0.798(4) 0.5582(8) 0.2875(8) 0.026(2) Uani 0.497(5) 1 d PDU A 2
H2B H 0.7792 0.6104 0.2589 0.031 Uiso 0.497(5) 1 calc PR A 2
C3B C 0.847(6) 0.5601(13) 0.3574(8) 0.024(3) Uani 0.497(5) 1 d PD A 2
H3B H 0.8604 0.6147 0.3837 0.029 Uiso 0.497(5) 1 calc PR A 2
C4B C 0.874(5) 0.4679(11) 0.3820(8) 0.022(2) Uani 0.497(5) 1 d PDU A 2
H4B H 0.9146 0.4497 0.4269 0.027 Uiso 0.497(5) 1 calc PR A 2
C5B C 0.829(3) 0.4085(8) 0.3263(5) 0.0191(17) Uani 0.497(5) 1 d PDU A 2
C6B C 0.8393(8) 0.3062(3) 0.3327(3) 0.0224(11) Uani 0.497(5) 1 d P A 2
H6B1 H 0.8015 0.2779 0.2889 0.034 Uiso 0.497(5) 1 calc PR A 2
H6B2 H 0.7465 0.2853 0.3591 0.034 Uiso 0.497(5) 1 calc PR A 2
H6B3 H 0.9765 0.2876 0.3544 0.034 Uiso 0.497(5) 1 calc PR A 2
C7A C 0.286(2) 0.4684(6) 0.2734(4) 0.0218(19) Uani 0.503(5) 1 d PDU A 1
H7A H 0.2526 0.4456 0.2296 0.026 Uiso 0.503(5) 1 calc PR A 1
C8A C 0.3092(14) 0.5631(6) 0.2920(5) 0.0246(17) Uani 0.503(5) 1 d PDU A 1
H8A H 0.2909 0.6150 0.2632 0.030 Uiso 0.503(5) 1 calc PR A 1
C9A C 0.365(3) 0.5659(11) 0.3622(6) 0.022(2) Uani 0.503(5) 1 d PDU A 1
H9A H 0.3927 0.6204 0.3883 0.027 Uiso 0.503(5) 1 calc PR A 1
C10A C 0.372(5) 0.4733(10) 0.3867(8) 0.024(2) Uani 0.503(5) 1 d PDU A 1
H10A H 0.4045 0.4549 0.4316 0.028 Uiso 0.503(5) 1 calc PR A 1
C11A C 0.322(2) 0.4137(7) 0.3311(5) 0.0192(19) Uani 0.503(5) 1 d PD A 1
C12A C 0.3151(8) 0.3100(3) 0.3362(3) 0.0239(11) Uani 0.503(5) 1 d P A 1
H12A H 0.3460 0.2918 0.3827 0.036 Uiso 0.503(5) 1 calc PR A 1
H12B H 0.4142 0.2825 0.3148 0.036 Uiso 0.503(5) 1 calc PR A 1
H12C H 0.1805 0.2879 0.3145 0.036 Uiso 0.503(5) 1 calc PR A 1
C7B C 0.292(2) 0.4469(6) 0.2827(4) 0.0225(18) Uani 0.497(5) 1 d PDU A 2
H7B H 0.2597 0.4116 0.2433 0.027 Uiso 0.497(5) 1 calc PR A 2
C8B C 0.346(3) 0.4103(8) 0.3473(6) 0.025(2) Uani 0.497(5) 1 d PDU A 2
H8B H 0.3553 0.3464 0.3590 0.030 Uiso 0.497(5) 1 calc PR A 2
C9B C 0.384(5) 0.4868(11) 0.3917(9) 0.027(3) Uani 0.497(5) 1 d PD A 2
H9B H 0.4232 0.4827 0.4383 0.032 Uiso 0.497(5) 1 calc PR A 2
C10B C 0.353(3) 0.5705(13) 0.3543(6) 0.025(3) Uiso 0.497(5) 1 d PD A 2
H10B H 0.3682 0.6319 0.3714 0.030 Uiso 0.497(5) 1 calc PR A 2
C11B C 0.2956(18) 0.5450(6) 0.2869(5) 0.021(2) Uiso 0.497(5) 1 d PD A 2
C12B C 0.2468(8) 0.6157(4) 0.2336(2) 0.0219(11) Uani 0.497(5) 1 d P A 2
H12D H 0.2621 0.6780 0.2530 0.033 Uiso 0.497(5) 1 calc PR A 2
H12E H 0.1079 0.6071 0.2085 0.033 Uiso 0.497(5) 1 calc PR A 2
H12F H 0.3382 0.6086 0.2042 0.033 Uiso 0.497(5) 1 calc PR A 2
C16 C 0.2091(3) 0.59298(15) -0.03217(11) 0.0150(4) Uani 1 1 d . . .
C17 C 0.3145(3) 0.57494(16) 0.03389(11) 0.0162(4) Uani 1 1 d . . .
C19 C 0.3387(3) 0.48869(16) 0.06048(11) 0.0159(4) Uani 1 1 d . . .
C21 C 0.2627(3) 0.40668(15) 0.02564(11) 0.0150(4) Uani 1 1 d . . .
C20 C 0.1604(3) 0.42451(15) -0.04044(11) 0.0163(4) Uani 1 1 d . . .
C18 C 0.1357(3) 0.51103(16) -0.06717(11) 0.0158(4) Uani 1 1 d . . .
C15 C 0.1799(3) 0.68275(16) -0.06007(11) 0.0168(4) Uani 1 1 d . . .
C22 C 0.2850(3) 0.31728(16) 0.05396(11) 0.0168(4) Uani 1 1 d . . .
C14 C 0.0997(4) 0.69897(16) -0.12869(12) 0.0189(5) Uani 1 1 d . . .
C13 C 0.2403(4) 0.76563(16) -0.02341(12) 0.0200(5) Uani 1 1 d . . .
C23 C 0.3734(4) 0.30136(16) 0.12204(12) 0.0193(5) Uani 1 1 d . . .
C24 C 0.2342(4) 0.23337(16) 0.01724(12) 0.0191(5) Uani 1 1 d . . .
F1 F 0.3976(2) 0.64649(10) 0.07189(7) 0.0230(3) Uani 1 1 d . . .
F3 F 0.4444(2) 0.48080(10) 0.12340(7) 0.0225(3) Uani 1 1 d . . .
F4 F 0.0783(2) 0.35286(9) -0.07860(7) 0.0223(3) Uani 1 1 d . . .
F2 F 0.0313(2) 0.51876(10) -0.13014(7) 0.0225(3) Uani 1 1 d . . .
Fe1 Fe 0.57973(5) 0.49238(2) 0.328727(18) 0.01921(12) Uani 1 1 d . . .
N2 N 0.0394(3) 0.71688(16) -0.18325(11) 0.0251(5) Uani 1 1 d . . .
N1 N 0.2835(4) 0.83563(16) 0.00266(12) 0.0290(5) Uani 1 1 d . . .
N3 N 0.4399(4) 0.28324(16) 0.17636(11) 0.0263(5) Uani 1 1 d . . .
N4 N 0.1996(4) 0.16254(15) -0.00814(12) 0.0275(5) Uani 1 1 d . . .
 
loop_
 _atom_site_aniso_label
 _atom_site_aniso_U_11
 _atom_site_aniso_U_22
 _atom_site_aniso_U_33
 _atom_site_aniso_U_23
 _atom_site_aniso_U_13
 _atom_site_aniso_U_12
C1A 0.021(4) 0.016(5) 0.035(6) -0.008(4) 0.016(5) -0.002(4)
C2A 0.020(3) 0.026(3) 0.037(5) 0.004(3) 0.007(5) 0.009(2)
C3A 0.018(4) 0.026(6) 0.035(5) -0.005(3) 0.003(4) 0.000(5)
C4A 0.016(4) 0.020(4) 0.034(5) 0.005(3) 0.009(4) -0.005(3)
C5A 0.020(3) 0.023(4) 0.026(3) -0.004(3) 0.012(2) -0.007(4)
C6A 0.023(2) 0.030(3) 0.020(2) -0.0033(19) 0.0062(19) -0.004(2)
C1B 0.026(3) 0.025(5) 0.021(3) 0.012(3) 0.014(3) 0.005(5)
C2B 0.022(3) 0.021(4) 0.038(4) 0.002(4) 0.015(3) -0.006(4)
C3B 0.020(6) 0.027(6) 0.024(4) -0.005(4) 0.005(5) -0.003(5)
C4B 0.017(3) 0.020(3) 0.028(4) 0.005(3) 0.002(3) 0.005(3)
C5B 0.018(3) 0.021(3) 0.019(4) -0.001(3) 0.005(4) 0.004(2)
C6B 0.025(3) 0.018(2) 0.025(2) 0.0035(18) 0.006(2) 0.0056(18)
C7A 0.014(2) 0.022(4) 0.027(3) 0.011(3) -0.001(2) 0.002(3)
C8A 0.013(3) 0.017(3) 0.043(4) 0.001(3) 0.007(2) 0.007(3)
C9A 0.019(4) 0.021(4) 0.032(4) -0.001(3) 0.018(3) 0.004(2)
C10A 0.024(5) 0.021(4) 0.029(4) 0.005(3) 0.013(3) 0.000(4)
C11A 0.014(4) 0.023(3) 0.020(4) 0.001(3) 0.003(4) 0.001(2)
C12A 0.025(2) 0.017(2) 0.031(3) 0.0021(19) 0.009(2) -0.0026(18)
C7B 0.019(3) 0.016(3) 0.032(4) -0.003(3) 0.005(3) -0.002(3)
C8B 0.021(4) 0.021(3) 0.034(5) 0.008(3) 0.007(4) -0.004(2)
C9B 0.022(5) 0.030(5) 0.033(5) -0.006(4) 0.017(4) -0.006(5)
C12B 0.021(2) 0.028(3) 0.017(2) -0.0033(18) 0.0042(18) -0.0011(19)
C16 0.0140(10) 0.0160(10) 0.0159(10) -0.0009(8) 0.0055(8) -0.0010(8)
C17 0.0152(10) 0.0169(10) 0.0163(10) -0.0040(8) 0.0032(8) -0.0025(8)
C19 0.0135(10) 0.0196(10) 0.0141(10) -0.0019(8) 0.0024(8) -0.0010(8)
C21 0.0138(10) 0.0161(10) 0.0163(10) -0.0016(8) 0.0057(8) -0.0003(8)
C20 0.0168(10) 0.0157(10) 0.0167(10) -0.0043(8) 0.0042(8) -0.0032(8)
C18 0.0165(10) 0.0190(10) 0.0116(10) -0.0009(8) 0.0027(8) -0.0009(8)
C15 0.0172(10) 0.0167(10) 0.0174(10) 0.0003(8) 0.0061(8) 0.0003(8)
C22 0.0165(10) 0.0163(10) 0.0173(10) 0.0000(8) 0.0034(8) 0.0013(8)
C14 0.0197(11) 0.0159(10) 0.0225(12) -0.0003(9) 0.0079(9) 0.0002(8)
C13 0.0211(11) 0.0185(11) 0.0213(12) 0.0023(9) 0.0069(9) -0.0003(9)
C23 0.0189(11) 0.0153(10) 0.0240(12) -0.0002(9) 0.0057(9) 0.0013(8)
C24 0.0201(11) 0.0177(10) 0.0203(11) 0.0021(9) 0.0063(9) 0.0020(9)
F1 0.0295(8) 0.0176(7) 0.0186(7) -0.0050(5) -0.0006(6) -0.0057(6)
F3 0.0272(8) 0.0226(7) 0.0139(6) 0.0001(5) -0.0030(6) -0.0020(6)
F4 0.0301(8) 0.0166(6) 0.0170(7) -0.0048(5) -0.0008(6) -0.0039(6)
F2 0.0297(8) 0.0212(7) 0.0133(6) 0.0009(5) -0.0015(6) -0.0020(6)
Fe1 0.01399(18) 0.02015(18) 0.0244(2) -0.00278(13) 0.00642(13) 0.00010(12)
N2 0.0300(12) 0.0233(10) 0.0225(11) 0.0031(8) 0.0071(9) 0.0021(9)
N1 0.0365(13) 0.0210(10) 0.0302(12) -0.0027(9) 0.0094(10) -0.0037(9)
N3 0.0316(12) 0.0222(10) 0.0229(11) 0.0027(8) 0.0022(9) 0.0013(9)
N4 0.0331(12) 0.0210(10) 0.0285(12) -0.0044(9) 0.0073(10) 0.0007(9)
 
_geom_special_details
;
 All s.u.'s (except the s.u. in the dihedral angle between two l.s. planes)
 are estimated using the full covariance matrix.  The cell s.u.'s are taken
 into account individually in the estimation of s.u.'s in distances, angles
 and torsion angles; correlations between s.u.'s in cell parameters are only
 used when they are defined by crystal symmetry.  An approximate (isotropic)
 treatment of cell s.u.'s is used for estimating s.u.'s involving l.s. planes.
;
 
loop_
 _geom_bond_atom_site_label_1
 _geom_bond_atom_site_label_2
 _geom_bond_distance
 _geom_bond_site_symmetry_2
 _geom_bond_publ_flag
C1A C5A 1.418(6) . ?
C1A C2A 1.418(6) . ?
C1A H1A 0.9500 . ?
C2A C3A 1.420(6) . ?
C2A H2A 0.9500 . ?
C3A C4A 1.421(6) . ?
C3A H3A 0.9500 . ?
C4A C5A 1.419(6) . ?
C4A H4A 0.9500 . ?
C5A C6A 1.481(13) . ?
C6A H6A1 0.9800 . ?
C6A H6A2 0.9800 . ?
C6A H6A3 0.9800 . ?
C1B C5B 1.417(6) . ?
C1B C2B 1.420(6) . ?
C1B H1B 0.9500 . ?
C2B C3B 1.420(6) . ?
C2B H2B 0.9500 . ?
C3B C4B 1.420(6) . ?
C3B H3B 0.9500 . ?
C4B C5B 1.420(6) . ?
C4B H4B 0.9500 . ?
C5B C6B 1.480(12) . ?
C6B H6B1 0.9800 . ?
C6B H6B2 0.9800 . ?
C6B H6B3 0.9800 . ?
C7A C11A 1.413(8) . ?
C7A C8A 1.417(9) . ?
C7A H7A 0.9500 . ?
C8A C9A 1.426(11) . ?
C8A H8A 0.9500 . ?
C9A C10A 1.425(7) . ?
C9A H9A 0.9500 . ?
C10A C11A 1.419(11) . ?
C10A H10A 0.9500 . ?
C11A C12A 1.499(11) . ?
C12A H12A 0.9800 . ?
C12A H12B 0.9800 . ?
C12A H12C 0.9800 . ?
C7B C8B 1.415(9) . ?
C7B C11B 1.416(8) . ?
C7B H7B 0.9500 . ?
C8B C9B 1.423(11) . ?
C8B H8B 0.9500 . ?
C9B C10B 1.425(7) . ?
C9B H9B 0.9500 . ?
C10B C11B 1.419(11) . ?
C10B H10B 0.9500 . ?
C11B C12B 1.488(11) . ?
C12B H12D 0.9800 . ?
C12B H12E 0.9800 . ?
C12B H12F 0.9800 . ?
C16 C15 1.413(3) . ?
C16 C18 1.417(3) . ?
C16 C17 1.423(3) . ?
C17 F1 1.343(2) . ?
C17 C19 1.355(3) . ?
C19 F3 1.348(3) . ?
C19 C21 1.421(3) . ?
C21 C22 1.410(3) . ?
C21 C20 1.417(3) . ?
C20 F4 1.344(2) . ?
C20 C18 1.360(3) . ?
C18 F2 1.346(3) . ?
C15 C13 1.426(3) . ?
C15 C14 1.429(3) . ?
C22 C23 1.428(3) . ?
C22 C24 1.430(3) . ?
C14 N2 1.147(3) . ?
C13 N1 1.151(3) . ?
C23 N3 1.149(3) . ?
C24 N4 1.149(3) . ?
 
loop_
 _geom_angle_atom_site_label_1
 _geom_angle_atom_site_label_2
 _geom_angle_atom_site_label_3
 _geom_angle
 _geom_angle_site_symmetry_1
 _geom_angle_site_symmetry_3
 _geom_angle_publ_flag
C5A C1A C2A 108.2(4) . . ?
C5A C1A H1A 125.9 . . ?
C2A C1A H1A 125.9 . . ?
C1A C2A C3A 107.1(10) . . ?
C1A C2A H2A 126.4 . . ?
C3A C2A H2A 126.4 . . ?
C2A C3A C4A 109.2(16) . . ?
C2A C3A H3A 125.4 . . ?
C4A C3A H3A 125.4 . . ?
C5A C4A C3A 106.7(16) . . ?
C5A C4A H4A 126.7 . . ?
C3A C4A H4A 126.7 . . ?
C1A C5A C4A 108.7(10) . . ?
C1A C5A C6A 129.3(11) . . ?
C4A C5A C6A 121.9(10) . . ?
C5A C6A H6A1 109.5 . . ?
C5A C6A H6A2 109.5 . . ?
H6A1 C6A H6A2 109.5 . . ?
C5A C6A H6A3 109.5 . . ?
H6A1 C6A H6A3 109.5 . . ?
H6A2 C6A H6A3 109.5 . . ?
C5B C1B C2B 108.1(4) . . ?
C5B C1B H1B 126.0 . . ?
C2B C1B H1B 126.0 . . ?
C1B C2B C3B 106.9(10) . . ?
C1B C2B H2B 126.5 . . ?
C3B C2B H2B 126.5 . . ?
C4B C3B C2B 109.5(15) . . ?
C4B C3B H3B 125.3 . . ?
C2B C3B H3B 125.3 . . ?
C5B C4B C3B 106.4(15) . . ?
C5B C4B H4B 126.8 . . ?
C3B C4B H4B 126.8 . . ?
C1B C5B C4B 109.0(10) . . ?
C1B C5B C6B 129.0(8) . . ?
C4B C5B C6B 122.0(9) . . ?
C5B C6B H6B1 109.5 . . ?
C5B C6B H6B2 109.5 . . ?
H6B1 C6B H6B2 109.5 . . ?
C5B C6B H6B3 109.5 . . ?
H6B1 C6B H6B3 109.5 . . ?
H6B2 C6B H6B3 109.5 . . ?
C11A C7A C8A 108.5(4) . . ?
C11A C7A H7A 125.7 . . ?
C8A C7A H7A 125.8 . . ?
C7A C8A C9A 107.1(9) . . ?
C7A C8A H8A 126.4 . . ?
C9A C8A H8A 126.4 . . ?
C10A C9A C8A 108.7(15) . . ?
C10A C9A H9A 125.6 . . ?
C8A C9A H9A 125.6 . . ?
C11A C10A C9A 107.0(15) . . ?
C11A C10A H10A 126.5 . . ?
C9A C10A H10A 126.5 . . ?
C7A C11A C10A 108.7(9) . . ?
C7A C11A C12A 127.9(8) . . ?
C10A C11A C12A 123.4(9) . . ?
C11A C12A H12A 109.5 . . ?
C11A C12A H12B 109.5 . . ?
H12A C12A H12B 109.5 . . ?
C11A C12A H12C 109.5 . . ?
H12A C12A H12C 109.5 . . ?
H12B C12A H12C 109.5 . . ?
C8B C7B C11B 108.4(4) . . ?
C8B C7B H7B 125.8 . . ?
C11B C7B H7B 125.8 . . ?
C7B C8B C9B 107.5(10) . . ?
C7B C8B H8B 126.3 . . ?
C9B C8B H8B 126.3 . . ?
C8B C9B C10B 108.5(16) . . ?
C8B C9B H9B 125.7 . . ?
C10B C9B H9B 125.7 . . ?
C11B C10B C9B 107.2(16) . . ?
C11B C10B H10B 126.4 . . ?
C9B C10B H10B 126.4 . . ?
C7B C11B C10B 108.4(10) . . ?
C7B C11B C12B 129.8(7) . . ?
C10B C11B C12B 121.8(9) . . ?
C11B C12B H12D 109.5 . . ?
C11B C12B H12E 109.5 . . ?
H12D C12B H12E 109.5 . . ?
C11B C12B H12F 109.5 . . ?
H12D C12B H12F 109.5 . . ?
H12E C12B H12F 109.5 . . ?
C15 C16 C18 123.4(2) . . ?
C15 C16 C17 123.9(2) . . ?
C18 C16 C17 112.7(2) . . ?
F1 C17 C19 117.9(2) . . ?
F1 C17 C16 118.8(2) . . ?
C19 C17 C16 123.4(2) . . ?
F3 C19 C17 117.6(2) . . ?
F3 C19 C21 118.5(2) . . ?
C17 C19 C21 123.9(2) . . ?
C22 C21 C20 123.6(2) . . ?
C22 C21 C19 123.6(2) . . ?
C20 C21 C19 112.7(2) . . ?
F4 C20 C18 117.8(2) . . ?
F4 C20 C21 118.7(2) . . ?
C18 C20 C21 123.5(2) . . ?
F2 C18 C20 117.6(2) . . ?
F2 C18 C16 118.55(19) . . ?
C20 C18 C16 123.8(2) . . ?
C16 C15 C13 123.3(2) . . ?
C16 C15 C14 123.2(2) . . ?
C13 C15 C14 113.4(2) . . ?
C21 C22 C23 122.9(2) . . ?
C21 C22 C24 123.9(2) . . ?
C23 C22 C24 113.1(2) . . ?
N2 C14 C15 176.2(3) . . ?
N1 C13 C15 175.7(3) . . ?
N3 C23 C22 175.9(3) . . ?
N4 C24 C22 175.0(3) . . ?
 
_diffrn_measured_fraction_theta_max    0.985
_diffrn_reflns_theta_full              28.40
_diffrn_measured_fraction_theta_full   0.985
_refine_diff_density_max    1.112
_refine_diff_density_min   -0.419
_refine_diff_density_rms    0.088
 
data_2-Et2F4
 
_audit_creation_method            SHELXL-97
_chemical_name_systematic
;
 ?
;
_chemical_name_common             ?
_chemical_melting_point           ?
_chemical_formula_moiety         'C12 F4 N4, C14 H18 Fe'
_chemical_formula_sum
 'C26 H18 F4 Fe N4'
_chemical_formula_weight          518.29
 
loop_
 _atom_type_symbol
 _atom_type_description
 _atom_type_scat_dispersion_real
 _atom_type_scat_dispersion_imag
 _atom_type_scat_source
 'C'  'C'   0.0033   0.0016
 'International Tables Vol C Tables 4.2.6.8 and 6.1.1.4'
 'H'  'H'   0.0000   0.0000
 'International Tables Vol C Tables 4.2.6.8 and 6.1.1.4'
 'N'  'N'   0.0061   0.0033
 'International Tables Vol C Tables 4.2.6.8 and 6.1.1.4'
 'F'  'F'   0.0171   0.0103
 'International Tables Vol C Tables 4.2.6.8 and 6.1.1.4'
 'Fe'  'Fe'   0.3463   0.8444
 'International Tables Vol C Tables 4.2.6.8 and 6.1.1.4'
 
_symmetry_cell_setting           'Monoclinic'
_symmetry_space_group_name_H-M   'P 21/c'
_symmetry_space_group_name_Hall    '-P 2ybc'
loop_
 _symmetry_equiv_pos_as_xyz
 'x, y, z'
 '-x, y+1/2, -z+1/2'
 '-x, -y, -z'
 'x, -y-1/2, z-1/2'
 
_cell_length_a                    6.8934(6)
_cell_length_b                    23.198(2)
_cell_length_c                    13.9021(13)
_cell_angle_alpha                 90.00
_cell_angle_beta                  94.965(2)
_cell_angle_gamma                 90.00
_cell_volume                      2214.7(3)
_cell_formula_units_Z             4
_cell_measurement_temperature     173
_cell_measurement_reflns_used     4515
_cell_measurement_theta_min       2.96
_cell_measurement_theta_max       28.32
_exptl_crystal_description        'prism'
_exptl_crystal_colour             'black'
_exptl_crystal_size_max           0.30
_exptl_crystal_size_mid           0.05
_exptl_crystal_size_min           0.03
_exptl_crystal_density_meas       ?
_exptl_crystal_density_diffrn     1.554
_exptl_crystal_density_method     'not measured'
_exptl_crystal_F_000              1056
_exptl_absorpt_coefficient_mu     0.738
_exptl_absorpt_correction_type    empirical
_exptl_absorpt_correction_T_min   0.8090
_exptl_absorpt_correction_T_max   0.9782
_exptl_absorpt_process_details    
;
SADABS Sheldrick 1996
;
_exptl_special_details
;
 ?
;
 
_diffrn_ambient_temperature       173
_diffrn_radiation_wavelength      0.71073
_diffrn_radiation_type            MoK\a
_diffrn_radiation_source          'Bruker TXS fine-focus rotating anode' 
_diffrn_radiation_monochromator   'Bruker Helios multilayer confocal mirror' 
_diffrn_measurement_device_type   'Bruker APEXII CCD area detector' 
_diffrn_measurement_method        'phi and omega scans' 
_diffrn_detector_area_resol_mean  8.333
_diffrn_standards_number          ?
_diffrn_standards_interval_count  ?
_diffrn_standards_interval_time   ?
_diffrn_standards_decay_%         ?
_diffrn_reflns_number             14243
_diffrn_reflns_av_R_equivalents   0.0486
_diffrn_reflns_av_unetI/netI     0.0567
_diffrn_reflns_limit_h_min        -8
_diffrn_reflns_limit_h_max        7
_diffrn_reflns_limit_k_min        -28
_diffrn_reflns_limit_k_max        28
_diffrn_reflns_limit_l_min        -17
_diffrn_reflns_limit_l_max        13
_diffrn_reflns_theta_min          2.29
_diffrn_reflns_theta_max          26.37
_reflns_number_total              4539
_reflns_number_gt                 3330
_reflns_threshold_expression      >2\s(I)
 
_computing_data_collection        'APEX2 (Bruker AXS, 2006)'
_computing_cell_refinement        'APEX2 (Bruker AXS, 2006)'
_computing_data_reduction         'SAINT (Bruker AXS, 2004)'
_computing_structure_solution     'SHELXS-97 (Sheldrick, 1997)'
_computing_structure_refinement   'SHELXL-97 (Sheldrick, 1997)'
_computing_molecular_graphics     'XSHEL (Bruker AXS,2002)'
_computing_publication_material   'XCIF (Bruker AXS, 2001)' 
_refine_special_details
;
 Refinement of F^2^ against ALL reflections.  The weighted R-factor wR and
 goodness of fit S are based on F^2^, conventional R-factors R are based
 on F, with F set to zero for negative F^2^. The threshold expression of
 F^2^ > 2\s(F^2^) is used only for calculating R-factors(gt) etc. and is
 not relevant to the choice of reflections for refinement.  R-factors based
 on F^2^ are statistically about twice as large as those based on F, and R-
 factors based on ALL data will be even larger.
 During the refinement, the restraint commands 'SADI' was also used to refine 
 the distances of C-C bonds in the Cp ring having disordered ethyl group. 
 The restraint command 'SIMU' and 'ISOR' was also used to refine the non-H 
 atoms with NPD and ADP problems. These atoms are as follows: C1 C2 
 C3 C4 C5 C11B C12B
;
 
_refine_ls_structure_factor_coef  Fsqd
_refine_ls_matrix_type            full
_refine_ls_weighting_scheme       calc
_refine_ls_weighting_details
 'calc w=1/[\s^2^(Fo^2^)+(0.0637P)^2^+0.0000P] where P=(Fo^2^+2Fc^2^)/3'
_atom_sites_solution_primary      direct
_atom_sites_solution_secondary    difmap
_atom_sites_solution_hydrogens    geom
_refine_ls_hydrogen_treatment     constr

_refine_ls_extinction_method      none
_refine_ls_extinction_coef        ?
_refine_ls_number_reflns          4539
_refine_ls_number_parameters      336
_refine_ls_number_restraints      58
_refine_ls_R_factor_all           0.0714
_refine_ls_R_factor_gt            0.0475
_refine_ls_wR_factor_ref          0.1184
_refine_ls_wR_factor_gt           0.1078
_refine_ls_goodness_of_fit_ref    1.012
_refine_ls_restrained_S_all       1.017
_refine_ls_shift/su_max           0.001
_refine_ls_shift/su_mean          0.000
 
loop_
 _atom_site_label
 _atom_site_type_symbol
 _atom_site_fract_x
 _atom_site_fract_y
 _atom_site_fract_z
 _atom_site_U_iso_or_equiv
 _atom_site_adp_type
 _atom_site_occupancy
 _atom_site_symmetry_multiplicity
 _atom_site_calc_flag
 _atom_site_refinement_flags
 _atom_site_disorder_assembly
 _atom_site_disorder_group
C11A C 0.5227(7) 0.3147(2) 0.5737(4) 0.0413(16) Uani 0.741(10) 1 d P A 1
H11A H 0.6630 0.3176 0.5956 0.050 Uiso 0.741(10) 1 calc PR A 1
H11B H 0.4491 0.3366 0.6197 0.050 Uiso 0.741(10) 1 calc PR A 1
C12A C 0.4605(9) 0.2520(3) 0.5737(5) 0.0563(19) Uani 0.741(10) 1 d P A 1
H12A H 0.4851 0.2361 0.6390 0.084 Uiso 0.741(10) 1 calc PR A 1
H12B H 0.5350 0.2301 0.5291 0.084 Uiso 0.741(10) 1 calc PR A 1
H12C H 0.3213 0.2491 0.5530 0.084 Uiso 0.741(10) 1 calc PR A 1
C11B C 0.5064(18) 0.2756(7) 0.5304(12) 0.034(3) Uani 0.259(10) 1 d PU A 2
H11C H 0.3974 0.2496 0.5090 0.041 Uiso 0.259(10) 1 calc PR A 2
H11D H 0.6318 0.2565 0.5211 0.041 Uiso 0.259(10) 1 calc PR A 2
C12B C 0.496(2) 0.2949(7) 0.6304(12) 0.044(4) Uani 0.259(10) 1 d PU A 2
H12D H 0.5053 0.2614 0.6735 0.066 Uiso 0.259(10) 1 calc PR A 2
H12E H 0.3725 0.3148 0.6361 0.066 Uiso 0.259(10) 1 calc PR A 2
H12F H 0.6044 0.3213 0.6483 0.066 Uiso 0.259(10) 1 calc PR A 2
C1 C 0.4866(4) 0.34106(16) 0.4735(3) 0.0486(10) Uani 1 1 d DU . .
C2 C 0.4822(4) 0.40106(17) 0.4660(3) 0.0444(9) Uani 1 1 d DU A .
H2 H 0.4980 0.4273 0.5185 0.053 Uiso 1 1 calc R . .
C3 C 0.4508(4) 0.41606(13) 0.3690(2) 0.0323(7) Uani 1 1 d U . .
H3 H 0.4434 0.4543 0.3444 0.039 Uiso 1 1 calc R A .
C4 C 0.4321(4) 0.36572(13) 0.3136(2) 0.0288(7) Uani 1 1 d U A .
H4 H 0.4092 0.3634 0.2454 0.035 Uiso 1 1 calc R . .
C5 C 0.4540(4) 0.31858(14) 0.3793(3) 0.0423(9) Uani 1 1 d DU A .
H5 H 0.4477 0.2789 0.3625 0.051 Uiso 1 1 calc R . .
C6 C -0.0568(4) 0.35528(12) 0.3296(2) 0.0240(6) Uani 1 1 d . . .
C7 C -0.0280(4) 0.31542(14) 0.4078(2) 0.0301(7) Uani 1 1 d . . .
H7 H -0.0265 0.2746 0.4023 0.036 Uiso 1 1 calc R . .
C8 C -0.0020(4) 0.34713(15) 0.4947(2) 0.0345(8) Uani 1 1 d . . .
H8 H 0.0192 0.3313 0.5578 0.041 Uiso 1 1 calc R . .
C9 C -0.0128(4) 0.40628(15) 0.4717(2) 0.0342(8) Uani 1 1 d . . .
H9 H -0.0006 0.4373 0.5163 0.041 Uiso 1 1 calc R . .
C10 C -0.0451(4) 0.41103(13) 0.3704(2) 0.0292(7) Uani 1 1 d . . .
H10 H -0.0570 0.4462 0.3353 0.035 Uiso 1 1 calc R . .
C13 C -0.0980(4) 0.34143(14) 0.2244(2) 0.0307(7) Uani 1 1 d . . .
H13A H -0.0436 0.3728 0.1865 0.037 Uiso 1 1 calc R . .
H13B H -0.2409 0.3415 0.2088 0.037 Uiso 1 1 calc R . .
C14 C -0.0191(5) 0.28488(15) 0.1911(3) 0.0451(9) Uani 1 1 d . . .
H14A H -0.0750 0.2532 0.2262 0.068 Uiso 1 1 calc R . .
H14B H 0.1229 0.2845 0.2038 0.068 Uiso 1 1 calc R . .
H14C H -0.0542 0.2802 0.1217 0.068 Uiso 1 1 calc R . .
C15 C 0.7397(4) 0.53777(11) 0.08683(19) 0.0185(6) Uani 1 1 d . . .
C16 C 0.7870(4) 0.55354(11) -0.0074(2) 0.0193(6) Uani 1 1 d . . .
C17 C 0.7830(4) 0.51630(12) -0.0821(2) 0.0200(6) Uani 1 1 d . . .
C18 C 0.7335(4) 0.45732(11) -0.07594(19) 0.0189(6) Uani 1 1 d . . .
C19 C 0.6867(4) 0.44123(11) 0.0178(2) 0.0185(6) Uani 1 1 d . . .
C20 C 0.6902(4) 0.47885(12) 0.0927(2) 0.0199(6) Uani 1 1 d . . .
C21 C 0.7407(4) 0.57663(11) 0.1650(2) 0.0222(6) Uani 1 1 d . . .
C22 C 0.7280(4) 0.41827(11) -0.1539(2) 0.0211(6) Uani 1 1 d . . .
C23 C 0.7227(4) 0.55772(13) 0.2616(2) 0.0252(6) Uani 1 1 d . . .
C24 C 0.7718(4) 0.63681(13) 0.1560(2) 0.0298(7) Uani 1 1 d . . .
C25 C 0.7594(4) 0.43564(12) -0.2501(2) 0.0255(6) Uani 1 1 d . . .
C26 C 0.7077(4) 0.35740(13) -0.1438(2) 0.0272(7) Uani 1 1 d . . .
N1 N 0.7120(4) 0.54464(12) 0.3408(2) 0.0366(6) Uani 1 1 d . . .
N2 N 0.7931(4) 0.68566(12) 0.1531(2) 0.0457(8) Uani 1 1 d . . .
N3 N 0.7815(4) 0.44703(12) -0.3287(2) 0.0374(7) Uani 1 1 d . . .
N4 N 0.6949(4) 0.30838(12) -0.1412(2) 0.0435(8) Uani 1 1 d . . .
F1 F 0.8408(2) 0.60816(7) -0.02280(12) 0.0312(4) Uani 1 1 d . . .
F2 F 0.8335(2) 0.53670(7) -0.16745(12) 0.0290(4) Uani 1 1 d . . .
F3 F 0.6289(2) 0.38715(7) 0.03271(12) 0.0277(4) Uani 1 1 d . . .
F4 F 0.6357(2) 0.45852(7) 0.17753(11) 0.0265(4) Uani 1 1 d . . .
Fe1 Fe 0.21607(5) 0.367424(16) 0.40721(3) 0.02066(13) Uani 1 1 d . . .
 
loop_
 _atom_site_aniso_label
 _atom_site_aniso_U_11
 _atom_site_aniso_U_22
 _atom_site_aniso_U_33
 _atom_site_aniso_U_23
 _atom_site_aniso_U_13
 _atom_site_aniso_U_12
C11A 0.031(2) 0.059(4) 0.033(3) 0.018(3) -0.003(2) 0.006(2)
C12A 0.071(4) 0.052(4) 0.048(4) 0.025(3) 0.018(3) 0.006(3)
C11B 0.026(6) 0.039(6) 0.036(6) -0.018(5) -0.004(5) 0.008(5)
C12B 0.054(7) 0.047(7) 0.032(6) 0.000(5) 0.010(6) 0.006(6)
C1 0.0206(16) 0.090(3) 0.036(2) 0.028(2) 0.0044(15) 0.0093(17)
C2 0.0278(17) 0.075(2) 0.0308(19) -0.0132(18) 0.0033(14) -0.0168(16)
C3 0.0258(16) 0.0342(17) 0.038(2) 0.0002(14) 0.0094(14) -0.0061(12)
C4 0.0232(15) 0.0420(17) 0.0225(16) -0.0014(13) 0.0085(12) -0.0023(12)
C5 0.0248(16) 0.0291(16) 0.076(3) 0.0071(17) 0.0235(16) 0.0061(13)
C6 0.0201(14) 0.0313(16) 0.0205(16) 0.0003(12) 0.0023(11) -0.0004(11)
C7 0.0219(15) 0.0378(18) 0.0314(19) 0.0040(14) 0.0074(13) -0.0052(12)
C8 0.0237(16) 0.060(2) 0.0203(17) 0.0084(15) 0.0053(13) -0.0017(14)
C9 0.0234(16) 0.051(2) 0.0282(19) -0.0130(15) 0.0039(13) 0.0053(13)
C10 0.0230(15) 0.0354(17) 0.0293(19) -0.0023(14) 0.0021(13) 0.0070(12)
C13 0.0297(16) 0.0383(17) 0.0233(17) -0.0021(13) -0.0025(13) -0.0019(13)
C14 0.056(2) 0.047(2) 0.032(2) -0.0131(17) -0.0012(17) 0.0044(17)
C15 0.0179(13) 0.0234(14) 0.0141(14) 0.0002(11) 0.0009(11) 0.0017(10)
C16 0.0194(13) 0.0184(13) 0.0197(15) 0.0033(11) 0.0005(11) -0.0029(10)
C17 0.0207(13) 0.0264(15) 0.0131(14) 0.0029(11) 0.0025(11) -0.0009(11)
C18 0.0172(13) 0.0239(14) 0.0154(15) -0.0008(11) 0.0013(11) 0.0015(10)
C19 0.0204(13) 0.0167(13) 0.0179(15) 0.0035(11) -0.0011(11) -0.0017(10)
C20 0.0193(13) 0.0265(15) 0.0139(15) 0.0043(11) 0.0019(11) 0.0009(11)
C21 0.0199(14) 0.0247(14) 0.0212(16) -0.0041(11) -0.0026(11) -0.0002(11)
C22 0.0193(14) 0.0249(14) 0.0191(15) -0.0003(11) 0.0017(11) -0.0007(11)
C23 0.0239(15) 0.0302(16) 0.0206(17) -0.0078(13) -0.0021(12) 0.0003(12)
C24 0.0280(16) 0.0315(17) 0.0295(18) -0.0104(14) 0.0008(13) -0.0020(13)
C25 0.0254(15) 0.0294(16) 0.0218(17) -0.0042(12) 0.0034(12) -0.0007(11)
C26 0.0241(15) 0.0300(18) 0.0279(18) -0.0065(13) 0.0053(12) 0.0013(12)
N1 0.0441(17) 0.0457(17) 0.0196(15) -0.0074(12) 0.0000(12) 0.0019(12)
N2 0.0510(19) 0.0276(16) 0.059(2) -0.0111(14) 0.0082(15) -0.0075(13)
N3 0.0465(17) 0.0458(16) 0.0208(16) -0.0043(13) 0.0078(12) -0.0012(13)
N4 0.0479(18) 0.0268(16) 0.058(2) -0.0074(13) 0.0172(15) 0.0004(12)
F1 0.0435(10) 0.0219(8) 0.0288(10) -0.0001(7) 0.0069(8) -0.0098(7)
F2 0.0416(10) 0.0304(9) 0.0159(9) 0.0034(7) 0.0078(7) -0.0067(7)
F3 0.0428(10) 0.0194(8) 0.0207(9) 0.0030(7) 0.0020(7) -0.0047(7)
F4 0.0411(10) 0.0270(9) 0.0117(8) 0.0036(7) 0.0043(7) -0.0037(7)
Fe1 0.0191(2) 0.0263(2) 0.0168(2) 0.00189(17) 0.00312(15) 0.00099(16)
 
_geom_special_details
;
 All s.u.'s (except the s.u. in the dihedral angle between two l.s. planes)
 are estimated using the full covariance matrix.  The cell s.u.'s are taken
 into account individually in the estimation of s.u.'s in distances, angles
 and torsion angles; correlations between s.u.'s in cell parameters are only
 used when they are defined by crystal symmetry.  An approximate (isotropic)
 treatment of cell s.u.'s is used for estimating s.u.'s involving l.s. planes.
;
 
loop_
 _geom_bond_atom_site_label_1
 _geom_bond_atom_site_label_2
 _geom_bond_distance
 _geom_bond_site_symmetry_2
 _geom_bond_publ_flag
C11A C12A 1.518(9) . ?
C11A C1 1.523(6) . ?
C11A H11A 0.9900 . ?
C11A H11B 0.9900 . ?
C12A H12A 0.9800 . ?
C12A H12B 0.9800 . ?
C12A H12C 0.9800 . ?
C11B C12B 1.47(2) . ?
C11B C1 1.711(17) . ?
C11B H11C 0.9900 . ?
C11B H11D 0.9900 . ?
C12B H12D 0.9800 . ?
C12B H12E 0.9800 . ?
C12B H12F 0.9800 . ?
C1 C2 1.396(4) . ?
C1 C5 1.409(4) . ?
C2 C3 1.391(5) . ?
C2 H2 0.9500 . ?
C3 C4 1.399(4) . ?
C3 H3 0.9500 . ?
C4 C5 1.424(5) . ?
C4 H4 0.9500 . ?
C5 H5 0.9500 . ?
C6 C10 1.412(4) . ?
C6 C7 1.428(4) . ?
C6 C13 1.501(4) . ?
C7 C8 1.413(4) . ?
C7 H7 0.9500 . ?
C8 C9 1.410(5) . ?
C8 H8 0.9500 . ?
C9 C10 1.410(4) . ?
C9 H9 0.9500 . ?
C10 H10 0.9500 . ?
C13 C14 1.508(4) . ?
C13 H13A 0.9900 . ?
C13 H13B 0.9900 . ?
C14 H14A 0.9800 . ?
C14 H14B 0.9800 . ?
C14 H14C 0.9800 . ?
C15 C21 1.411(4) . ?
C15 C20 1.413(4) . ?
C15 C16 1.425(4) . ?
C16 F1 1.343(3) . ?
C16 C17 1.349(4) . ?
C17 F2 1.351(3) . ?
C17 C18 1.414(4) . ?
C18 C22 1.411(4) . ?
C18 C19 1.420(4) . ?
C19 F3 1.338(3) . ?
C19 C20 1.357(4) . ?
C20 F4 1.353(3) . ?
C21 C24 1.420(4) . ?
C21 C23 1.429(4) . ?
C22 C26 1.427(4) . ?
C22 C25 1.431(4) . ?
C23 N1 1.151(4) . ?
C24 N2 1.144(4) . ?
C25 N3 1.148(4) . ?
C26 N4 1.141(4) . ?
 
loop_
 _geom_angle_atom_site_label_1
 _geom_angle_atom_site_label_2
 _geom_angle_atom_site_label_3
 _geom_angle
 _geom_angle_site_symmetry_1
 _geom_angle_site_symmetry_3
 _geom_angle_publ_flag
C12A C11A C1 111.1(5) . . ?
C12A C11A H11A 109.4 . . ?
C1 C11A H11A 109.4 . . ?
C12A C11A H11B 109.4 . . ?
C1 C11A H11B 109.4 . . ?
H11A C11A H11B 108.0 . . ?
C11A C12A H12A 109.5 . . ?
C11A C12A H12B 109.5 . . ?
H12A C12A H12B 109.5 . . ?
C11A C12A H12C 109.5 . . ?
H12A C12A H12C 109.5 . . ?
H12B C12A H12C 109.5 . . ?
C12B C11B C1 99.2(11) . . ?
C12B C11B H11C 111.9 . . ?
C1 C11B H11C 111.9 . . ?
C12B C11B H11D 111.9 . . ?
C1 C11B H11D 111.9 . . ?
H11C C11B H11D 109.6 . . ?
C11B C12B H12D 109.5 . . ?
C11B C12B H12E 109.5 . . ?
H12D C12B H12E 109.5 . . ?
C11B C12B H12F 109.5 . . ?
H12D C12B H12F 109.5 . . ?
H12E C12B H12F 109.5 . . ?
C2 C1 C5 107.4(3) . . ?
C2 C1 C11A 118.0(4) . . ?
C5 C1 C11A 134.6(4) . . ?
C2 C1 C11B 156.7(6) . . ?
C5 C1 C11B 95.8(5) . . ?
C11A C1 C11B 38.8(5) . . ?
C3 C2 C1 108.8(3) . . ?
C3 C2 H2 125.6 . . ?
C1 C2 H2 125.6 . . ?
C2 C3 C4 108.9(3) . . ?
C2 C3 H3 125.5 . . ?
C4 C3 H3 125.5 . . ?
C3 C4 C5 106.8(3) . . ?
C3 C4 H4 126.6 . . ?
C5 C4 H4 126.6 . . ?
C1 C5 C4 108.1(3) . . ?
C1 C5 H5 125.9 . . ?
C4 C5 H5 125.9 . . ?
C10 C6 C7 106.7(3) . . ?
C10 C6 C13 126.0(3) . . ?
C7 C6 C13 127.3(3) . . ?
C8 C7 C6 108.2(3) . . ?
C8 C7 H7 125.9 . . ?
C6 C7 H7 125.9 . . ?
C9 C8 C7 108.2(3) . . ?
C9 C8 H8 125.9 . . ?
C7 C8 H8 125.9 . . ?
C8 C9 C10 107.7(3) . . ?
C8 C9 H9 126.2 . . ?
C10 C9 H9 126.2 . . ?
C9 C10 C6 109.2(3) . . ?
C9 C10 H10 125.4 . . ?
C6 C10 H10 125.4 . . ?
C6 C13 C14 116.2(3) . . ?
C6 C13 H13A 108.2 . . ?
C14 C13 H13A 108.2 . . ?
C6 C13 H13B 108.2 . . ?
C14 C13 H13B 108.2 . . ?
H13A C13 H13B 107.4 . . ?
C13 C14 H14A 109.5 . . ?
C13 C14 H14B 109.5 . . ?
H14A C14 H14B 109.5 . . ?
C13 C14 H14C 109.5 . . ?
H14A C14 H14C 109.5 . . ?
H14B C14 H14C 109.5 . . ?
C21 C15 C20 123.9(2) . . ?
C21 C15 C16 123.9(2) . . ?
C20 C15 C16 112.2(2) . . ?
F1 C16 C17 118.0(2) . . ?
F1 C16 C15 118.5(2) . . ?
C17 C16 C15 123.5(2) . . ?
C16 C17 F2 117.5(2) . . ?
C16 C17 C18 124.2(2) . . ?
F2 C17 C18 118.3(2) . . ?
C22 C18 C17 124.4(2) . . ?
C22 C18 C19 122.9(2) . . ?
C17 C18 C19 112.6(2) . . ?
F3 C19 C20 118.0(2) . . ?
F3 C19 C18 118.9(2) . . ?
C20 C19 C18 123.0(2) . . ?
F4 C20 C19 117.2(2) . . ?
F4 C20 C15 118.3(2) . . ?
C19 C20 C15 124.5(2) . . ?
C15 C21 C24 123.5(3) . . ?
C15 C21 C23 122.2(2) . . ?
C24 C21 C23 114.2(3) . . ?
C18 C22 C26 123.8(3) . . ?
C18 C22 C25 122.7(2) . . ?
C26 C22 C25 113.3(2) . . ?
N1 C23 C21 177.1(3) . . ?
N2 C24 C21 176.6(4) . . ?
N3 C25 C22 176.7(3) . . ?
N4 C26 C22 175.9(3) . . ?
 
_diffrn_measured_fraction_theta_max    1.000
_diffrn_reflns_theta_full              26.37
_diffrn_measured_fraction_theta_full   1.000
_refine_diff_density_max    0.627
_refine_diff_density_min   -0.335
_refine_diff_density_rms    0.081
 
data_3-tBuF4
 
_audit_creation_method            SHELXL-97
_chemical_name_systematic
;
 ?
;
_chemical_name_common             ?
_chemical_melting_point           ?
_chemical_formula_moiety         'C12 F4 N4, C14 H18 Fe'
_chemical_formula_sum
 'C26 H18 F4 Fe N4'
_chemical_formula_weight          518.29
 
loop_
 _atom_type_symbol
 _atom_type_description
 _atom_type_scat_dispersion_real
 _atom_type_scat_dispersion_imag
 _atom_type_scat_source
 'C'  'C'   0.0033   0.0016
 'International Tables Vol C Tables 4.2.6.8 and 6.1.1.4'
 'H'  'H'   0.0000   0.0000
 'International Tables Vol C Tables 4.2.6.8 and 6.1.1.4'
 'N'  'N'   0.0061   0.0033
 'International Tables Vol C Tables 4.2.6.8 and 6.1.1.4'
 'F'  'F'   0.0171   0.0103
 'International Tables Vol C Tables 4.2.6.8 and 6.1.1.4'
 'Fe'  'Fe'   0.3463   0.8444
 'International Tables Vol C Tables 4.2.6.8 and 6.1.1.4'
 
_symmetry_cell_setting           'Triclinic'
_symmetry_space_group_name_H-M   'P -1'
_symmetry_space_group_name_Hall    '-P 1'
loop_
 _symmetry_equiv_pos_as_xyz
 'x, y, z'
 '-x, -y, -z'
 
_cell_length_a                    6.9080(9)
_cell_length_b                    12.2607(15)
_cell_length_c                    15.056(3)
_cell_angle_alpha                 111.163(3)
_cell_angle_beta                  98.851(3)
_cell_angle_gamma                 96.721(2)
_cell_volume                      1154.3(3)
_cell_formula_units_Z             2
_cell_measurement_temperature     173
_cell_measurement_reflns_used    1357
_cell_measurement_theta_min        2.75
_cell_measurement_theta_max       25.26
_exptl_crystal_description        'prism'
_exptl_crystal_colour             'black'
_exptl_crystal_size_max           0.38
_exptl_crystal_size_mid           0.05
_exptl_crystal_size_min           0.05
_exptl_crystal_density_meas       ?
_exptl_crystal_density_diffrn     1.491
_exptl_crystal_density_method     'not measured'
_exptl_crystal_F_000              528
_exptl_absorpt_coefficient_mu     0.708
_exptl_absorpt_correction_type    empirical
_exptl_absorpt_correction_T_min   0.7748
_exptl_absorpt_correction_T_max   0.9655
_exptl_absorpt_process_details    
;
SADABS Sheldrick 1996
;
_exptl_special_details
;
 ?
;
 
_diffrn_ambient_temperature       173
_diffrn_radiation_wavelength      0.71073
_diffrn_radiation_type            MoK\a
_diffrn_radiation_source          'Bruker TXS fine-focus rotating anode' 
_diffrn_radiation_monochromator   'Bruker Helios multilayer confocal mirror' 
_diffrn_measurement_device_type   'Bruker APEXII CCD area detector' 
_diffrn_measurement_method        'phi and omega scans' 
_diffrn_detector_area_resol_mean  8.333
_diffrn_standards_number          ?
_diffrn_standards_interval_count  ?
_diffrn_standards_interval_time   ?
_diffrn_standards_decay_%         ?
_diffrn_reflns_number             6597
_diffrn_reflns_av_R_equivalents   0.0276
_diffrn_reflns_av_unetI/netI     0.0709
_diffrn_reflns_limit_h_min        -8
_diffrn_reflns_limit_h_max        8
_diffrn_reflns_limit_k_min        -15
_diffrn_reflns_limit_k_max        15
_diffrn_reflns_limit_l_min        -18
_diffrn_reflns_limit_l_max        16
_diffrn_reflns_theta_min          2.75
_diffrn_reflns_theta_max          26.15
_reflns_number_total              4566
_reflns_number_gt                 3083
_reflns_threshold_expression      >2\s(I)
 
_computing_data_collection        'APEX2 (Bruker AXS, 2006)'
_computing_cell_refinement        'APEX2 (Bruker AXS, 2006)'
_computing_data_reduction         'SAINT (Bruker AXS, 2004)'
_computing_structure_solution     'SHELXS-97 (Sheldrick, 1997)'
_computing_structure_refinement   'SHELXL-97 (Sheldrick, 1997)'
_computing_molecular_graphics     'XSHEL (Bruker AXS,2002)'
_computing_publication_material   'XCIF (Bruker AXS, 2001)' 
_refine_special_details
;
 Refinement of F^2^ against ALL reflections.  The weighted R-factor wR and
 goodness of fit S are based on F^2^, conventional R-factors R are based
 on F, with F set to zero for negative F^2^. The threshold expression of
 F^2^ > 2\s(F^2^) is used only for calculating R-factors(gt) etc. and is
 not relevant to the choice of reflections for refinement.  R-factors based
 on F^2^ are statistically about twice as large as those based on F, and R-
 factors based on ALL data will be even larger.
 During the refinement, the restraint commands 'SADI' was also used to refine 
 the distances of C-C bonds in the disorder of tert-butyl group. 
 The restraint command 'SIMU' and 'ISOR' were also used to refine the non-H 
 atoms with NPD and ADP problems. These atoms are as follows: C7A C8A 
 C9A C7B C8B C9B C10 C11 C12 C13 C14
;
 
_refine_ls_structure_factor_coef  Fsqd
_refine_ls_matrix_type            full
_refine_ls_weighting_scheme       calc
_refine_ls_weighting_details
 'calc w=1/[\s^2^(Fo^2^)+(0.0706P)^2^+0.3544P] where P=(Fo^2^+2Fc^2^)/3'
_atom_sites_solution_primary      direct
_atom_sites_solution_secondary    difmap
_atom_sites_solution_hydrogens    geom
_refine_ls_hydrogen_treatment     constr

_refine_ls_extinction_method      none
_refine_ls_extinction_coef        ?
_refine_ls_number_reflns          4566
_refine_ls_number_parameters      344
_refine_ls_number_restraints      129
_refine_ls_R_factor_all           0.0942
_refine_ls_R_factor_gt            0.0554
_refine_ls_wR_factor_ref          0.1451
_refine_ls_wR_factor_gt           0.1269
_refine_ls_goodness_of_fit_ref    1.021
_refine_ls_restrained_S_all       1.051
_refine_ls_shift/su_max           0.000
_refine_ls_shift/su_mean          0.000
 
loop_
 _atom_site_label
 _atom_site_type_symbol
 _atom_site_fract_x
 _atom_site_fract_y
 _atom_site_fract_z
 _atom_site_U_iso_or_equiv
 _atom_site_adp_type
 _atom_site_occupancy
 _atom_site_symmetry_multiplicity
 _atom_site_calc_flag
 _atom_site_refinement_flags
 _atom_site_disorder_assembly
 _atom_site_disorder_group
C7A C 1.3457(14) 0.447(3) 0.3551(15) 0.062(5) Uani 0.40(4) 1 d PDU A 1
H7A1 H 1.3674 0.4851 0.4262 0.092 Uiso 0.40(4) 1 calc PR A 1
H7A2 H 1.4201 0.4999 0.3308 0.092 Uiso 0.40(4) 1 calc PR A 1
H7A3 H 1.3920 0.3714 0.3366 0.092 Uiso 0.40(4) 1 calc PR A 1
C8A C 1.031(4) 0.5384(16) 0.344(2) 0.056(6) Uani 0.40(4) 1 d PDU A 1
H8A1 H 1.0487 0.5704 0.4147 0.084 Uiso 0.40(4) 1 calc PR A 1
H8A2 H 0.8884 0.5192 0.3138 0.084 Uiso 0.40(4) 1 calc PR A 1
H8A3 H 1.0984 0.5980 0.3238 0.084 Uiso 0.40(4) 1 calc PR A 1
C9A C 1.015(4) 0.332(2) 0.342(2) 0.047(5) Uani 0.40(4) 1 d PDU A 1
H9A1 H 1.0236 0.3666 0.4123 0.070 Uiso 0.40(4) 1 calc PR A 1
H9A2 H 1.0794 0.2625 0.3252 0.070 Uiso 0.40(4) 1 calc PR A 1
H9A3 H 0.8745 0.3080 0.3079 0.070 Uiso 0.40(4) 1 calc PR A 1
C7B C 1.3348(14) 0.4983(18) 0.3540(10) 0.060(4) Uani 0.60(4) 1 d PDU A 2
H7B1 H 1.3526 0.5373 0.4249 0.089 Uiso 0.60(4) 1 calc PR A 2
H7B2 H 1.3568 0.5588 0.3264 0.089 Uiso 0.60(4) 1 calc PR A 2
H7B3 H 1.4309 0.4450 0.3385 0.089 Uiso 0.60(4) 1 calc PR A 2
C9B C 1.074(3) 0.3341(14) 0.3553(14) 0.057(4) Uani 0.60(4) 1 d PDU A 2
H9B1 H 1.0877 0.3755 0.4258 0.086 Uiso 0.60(4) 1 calc PR A 2
H9B2 H 1.1676 0.2788 0.3430 0.086 Uiso 0.60(4) 1 calc PR A 2
H9B3 H 0.9375 0.2898 0.3261 0.086 Uiso 0.60(4) 1 calc PR A 2
C8B C 0.979(2) 0.5155(12) 0.3331(12) 0.041(3) Uani 0.60(4) 1 d PDU A 2
H8B1 H 0.9911 0.5525 0.4038 0.061 Uiso 0.60(4) 1 calc PR A 2
H8B2 H 0.8412 0.4740 0.3020 0.061 Uiso 0.60(4) 1 calc PR A 2
H8B3 H 1.0143 0.5770 0.3082 0.061 Uiso 0.60(4) 1 calc PR A 2
C1 C 1.1006(6) 0.2476(4) 0.1448(3) 0.0373(10) Uani 1 1 d . . .
H1 H 1.1036 0.1857 0.1686 0.045 Uiso 1 1 calc R . .
C2 C 1.0932(6) 0.2340(4) 0.0465(3) 0.0436(11) Uani 1 1 d . . .
H2 H 1.0914 0.1620 -0.0066 0.052 Uiso 1 1 calc R . .
C3 C 1.0892(6) 0.3461(4) 0.0421(3) 0.0428(11) Uani 1 1 d . . .
H3 H 1.0839 0.3632 -0.0148 0.051 Uiso 1 1 calc R . .
C4 C 1.0945(6) 0.4290(4) 0.1363(3) 0.0341(9) Uani 1 1 d . . .
H4 H 1.0930 0.5114 0.1536 0.041 Uiso 1 1 calc R . .
C5 C 1.1025(5) 0.3683(3) 0.2015(3) 0.0297(9) Uani 1 1 d . A .
C6 C 1.1207(6) 0.4255(3) 0.3101(3) 0.0412(10) Uani 1 1 d D . .
C10 C 0.5902(6) 0.1698(5) 0.0700(4) 0.0550(13) Uani 1 1 d U . .
H10 H 0.5913 0.0974 0.0796 0.066 Uiso 1 1 calc R . .
C11 C 0.5969(7) 0.1841(6) -0.0165(4) 0.0692(16) Uani 1 1 d U . .
H11 H 0.6043 0.1242 -0.0766 0.083 Uiso 1 1 calc R . .
C12 C 0.5908(7) 0.3037(6) 0.0013(5) 0.0667(15) Uani 1 1 d U . .
H12 H 0.5915 0.3397 -0.0450 0.080 Uiso 1 1 calc R . .
C13 C 0.5835(6) 0.3608(5) 0.0991(5) 0.0632(14) Uani 1 1 d U . .
H13 H 0.5803 0.4426 0.1320 0.076 Uiso 1 1 calc R . .
C14 C 0.5818(6) 0.2760(5) 0.1388(4) 0.0540(13) Uani 1 1 d U . .
H14 H 0.5757 0.2898 0.2045 0.065 Uiso 1 1 calc R . .
C15 C 0.8306(6) 0.9441(4) 0.2135(3) 0.0323(9) Uani 1 1 d . . .
C16 C 0.7803(6) 0.7473(4) 0.2106(3) 0.0318(9) Uani 1 1 d . . .
C17 C 0.8001(5) 0.8711(3) 0.2679(3) 0.0270(8) Uani 1 1 d . . .
C18 C 0.7792(5) 0.9152(3) 0.3652(3) 0.0254(8) Uani 1 1 d . . .
C19 C 0.8049(5) 1.0370(3) 0.4235(3) 0.0265(8) Uani 1 1 d . . .
C20 C 0.7245(5) 0.8408(3) 0.4145(3) 0.0265(8) Uani 1 1 d . . .
C21 C 0.7865(5) 1.0802(3) 0.5182(3) 0.0265(8) Uani 1 1 d . . .
C22 C 0.7030(5) 0.8839(3) 0.5082(3) 0.0265(8) Uani 1 1 d . . .
C23 C 0.7329(5) 1.0065(3) 0.5672(3) 0.0260(8) Uani 1 1 d . . .
C24 C 0.7151(5) 1.0510(3) 0.6662(3) 0.0294(9) Uani 1 1 d . . .
C25 C 0.7268(5) 1.1736(4) 0.7232(3) 0.0324(9) Uani 1 1 d . . .
C26 C 0.6669(6) 0.9762(4) 0.7159(3) 0.0360(10) Uani 1 1 d . . .
N1 N 0.8526(6) 0.9949(3) 0.1645(3) 0.0422(9) Uani 1 1 d . . .
N2 N 0.7676(5) 0.6502(3) 0.1595(3) 0.0417(9) Uani 1 1 d . . .
N3 N 0.7294(5) 1.2691(3) 0.7744(3) 0.0453(9) Uani 1 1 d . . .
N4 N 0.6267(6) 0.9239(4) 0.7625(3) 0.0508(10) Uani 1 1 d . . .
F1 F 0.8583(3) 1.11705(18) 0.38537(16) 0.0368(6) Uani 1 1 d . . .
F2 F 0.6926(3) 0.72248(18) 0.36646(16) 0.0363(6) Uani 1 1 d . . .
F3 F 0.8189(3) 1.19855(18) 0.56630(16) 0.0375(6) Uani 1 1 d . . .
F4 F 0.6460(3) 0.80402(19) 0.54596(17) 0.0385(6) Uani 1 1 d . . .
Fe1 Fe 0.84299(8) 0.29346(5) 0.08797(4) 0.02954(19) Uani 1 1 d . . .
 
loop_
 _atom_site_aniso_label
 _atom_site_aniso_U_11
 _atom_site_aniso_U_22
 _atom_site_aniso_U_33
 _atom_site_aniso_U_23
 _atom_site_aniso_U_13
 _atom_site_aniso_U_12
C7A 0.063(7) 0.067(9) 0.045(7) 0.020(7) 0.003(6) -0.011(6)
C8A 0.072(10) 0.040(8) 0.049(8) 0.012(6) 0.019(7) -0.006(7)
C9A 0.054(9) 0.054(7) 0.040(8) 0.027(5) 0.005(6) 0.018(6)
C7B 0.047(5) 0.059(7) 0.049(5) 0.004(5) -0.008(4) -0.003(4)
C9B 0.075(8) 0.067(6) 0.047(6) 0.037(5) 0.015(6) 0.025(5)
C8B 0.057(6) 0.027(5) 0.027(5) 0.002(4) 0.002(5) -0.003(5)
C1 0.021(2) 0.035(2) 0.051(3) 0.013(2) 0.0015(18) 0.0047(16)
C2 0.028(2) 0.051(3) 0.041(3) 0.004(2) 0.0095(19) 0.010(2)
C3 0.029(2) 0.062(3) 0.033(2) 0.017(2) 0.0083(18) -0.003(2)
C4 0.025(2) 0.036(2) 0.044(3) 0.020(2) 0.0088(18) -0.0035(17)
C5 0.0192(19) 0.034(2) 0.036(2) 0.0151(19) 0.0050(16) 0.0005(16)
C6 0.044(3) 0.045(3) 0.032(2) 0.016(2) 0.0025(19) 0.003(2)
C10 0.026(2) 0.051(3) 0.088(3) 0.032(3) 0.003(2) -0.0038(19)
C11 0.029(2) 0.087(4) 0.061(3) 0.003(3) -0.001(2) -0.009(2)
C12 0.031(2) 0.102(4) 0.084(3) 0.067(3) -0.006(2) -0.005(2)
C13 0.021(2) 0.048(3) 0.110(4) 0.021(3) 0.008(2) 0.0059(19)
C14 0.024(2) 0.070(3) 0.060(3) 0.020(2) 0.012(2) -0.006(2)
C15 0.026(2) 0.035(2) 0.032(2) 0.0105(19) 0.0028(17) 0.0016(17)
C16 0.027(2) 0.039(3) 0.035(2) 0.021(2) 0.0071(17) 0.0041(17)
C17 0.0201(19) 0.030(2) 0.031(2) 0.0144(17) 0.0015(15) 0.0014(15)
C18 0.0141(17) 0.030(2) 0.032(2) 0.0140(17) 0.0023(15) -0.0002(14)
C19 0.0201(19) 0.029(2) 0.035(2) 0.0196(18) 0.0043(16) 0.0000(15)
C20 0.0206(19) 0.0216(19) 0.035(2) 0.0120(17) 0.0011(16) 0.0004(14)
C21 0.0217(19) 0.0208(19) 0.035(2) 0.0099(17) 0.0028(16) 0.0022(14)
C22 0.0185(18) 0.029(2) 0.038(2) 0.0203(18) 0.0063(16) 0.0024(15)
C23 0.0155(18) 0.032(2) 0.032(2) 0.0154(17) 0.0016(15) 0.0015(15)
C24 0.0211(19) 0.034(2) 0.033(2) 0.0138(18) 0.0045(16) 0.0042(16)
C25 0.0180(19) 0.042(3) 0.038(2) 0.017(2) 0.0074(17) 0.0007(17)
C26 0.033(2) 0.044(3) 0.035(2) 0.018(2) 0.0119(19) 0.0097(18)
N1 0.048(2) 0.044(2) 0.040(2) 0.0235(19) 0.0103(17) 0.0046(17)
N2 0.051(2) 0.035(2) 0.039(2) 0.0134(18) 0.0121(18) 0.0045(17)
N3 0.043(2) 0.043(2) 0.046(2) 0.012(2) 0.0146(18) 0.0040(18)
N4 0.056(3) 0.058(3) 0.054(3) 0.034(2) 0.023(2) 0.016(2)
F1 0.0449(14) 0.0308(12) 0.0392(14) 0.0207(11) 0.0091(11) -0.0001(10)
F2 0.0452(14) 0.0242(12) 0.0390(14) 0.0125(10) 0.0103(11) 0.0016(10)
F3 0.0470(14) 0.0257(12) 0.0380(13) 0.0111(10) 0.0104(11) 0.0016(10)
F4 0.0468(14) 0.0339(13) 0.0414(14) 0.0235(11) 0.0109(11) 0.0008(10)
Fe1 0.0183(3) 0.0343(3) 0.0359(4) 0.0150(3) 0.0048(2) 0.0007(2)
 
_geom_special_details
;
 All s.u.'s (except the s.u. in the dihedral angle between two l.s. planes)
 are estimated using the full covariance matrix.  The cell s.u.'s are taken
 into account individually in the estimation of s.u.'s in distances, angles
 and torsion angles; correlations between s.u.'s in cell parameters are only
 used when they are defined by crystal symmetry.  An approximate (isotropic)
 treatment of cell s.u.'s is used for estimating s.u.'s involving l.s. planes.
;
 
loop_
 _geom_bond_atom_site_label_1
 _geom_bond_atom_site_label_2
 _geom_bond_distance
 _geom_bond_site_symmetry_2
 _geom_bond_publ_flag
C7A C6 1.547(8) . ?
C7A H7A1 0.9800 . ?
C7A H7A2 0.9800 . ?
C7A H7A3 0.9800 . ?
C8A C6 1.533(8) . ?
C8A H8A1 0.9800 . ?
C8A H8A2 0.9800 . ?
C8A H8A3 0.9800 . ?
C9A C6 1.541(8) . ?
C9A H9A1 0.9800 . ?
C9A H9A2 0.9800 . ?
C9A H9A3 0.9800 . ?
C7B C6 1.544(7) . ?
C7B H7B1 0.9800 . ?
C7B H7B2 0.9800 . ?
C7B H7B3 0.9800 . ?
C9B C6 1.534(7) . ?
C9B H9B1 0.9800 . ?
C9B H9B2 0.9800 . ?
C9B H9B3 0.9800 . ?
C8B C6 1.542(7) . ?
C8B H8B1 0.9800 . ?
C8B H8B2 0.9800 . ?
C8B H8B3 0.9800 . ?
C1 C5 1.413(5) . ?
C1 C2 1.420(6) . ?
C1 H1 0.9500 . ?
C2 C3 1.404(6) . ?
C2 H2 0.9500 . ?
C3 C4 1.407(6) . ?
C3 H3 0.9500 . ?
C4 C5 1.429(5) . ?
C4 H4 0.9500 . ?
C5 C6 1.507(6) . ?
C10 C14 1.355(7) . ?
C10 C11 1.383(8) . ?
C10 H10 0.9500 . ?
C11 C12 1.400(8) . ?
C11 H11 0.9500 . ?
C12 C13 1.396(8) . ?
C12 H12 0.9500 . ?
C13 C14 1.373(7) . ?
C13 H13 0.9500 . ?
C14 H14 0.9500 . ?
C15 N1 1.139(5) . ?
C15 C17 1.434(5) . ?
C16 N2 1.145(5) . ?
C16 C17 1.427(6) . ?
C17 C18 1.404(5) . ?
C18 C19 1.406(5) . ?
C18 C20 1.421(5) . ?
C19 F1 1.348(4) . ?
C19 C21 1.362(5) . ?
C20 F2 1.340(4) . ?
C20 C22 1.355(5) . ?
C21 F3 1.340(4) . ?
C21 C23 1.409(5) . ?
C22 F4 1.348(4) . ?
C22 C23 1.413(5) . ?
C23 C24 1.421(5) . ?
C24 C26 1.419(6) . ?
C24 C25 1.422(6) . ?
C25 N3 1.142(5) . ?
C26 N4 1.150(5) . ?
 
loop_
 _geom_angle_atom_site_label_1
 _geom_angle_atom_site_label_2
 _geom_angle_atom_site_label_3
 _geom_angle
 _geom_angle_site_symmetry_1
 _geom_angle_site_symmetry_3
 _geom_angle_publ_flag
C6 C7A H7A1 109.5 . . ?
C6 C7A H7A2 109.5 . . ?
H7A1 C7A H7A2 109.5 . . ?
C6 C7A H7A3 109.5 . . ?
H7A1 C7A H7A3 109.5 . . ?
H7A2 C7A H7A3 109.5 . . ?
C6 C8A H8A1 109.5 . . ?
C6 C8A H8A2 109.5 . . ?
H8A1 C8A H8A2 109.5 . . ?
C6 C8A H8A3 109.5 . . ?
H8A1 C8A H8A3 109.5 . . ?
H8A2 C8A H8A3 109.5 . . ?
C6 C9A H9A1 109.5 . . ?
C6 C9A H9A2 109.5 . . ?
H9A1 C9A H9A2 109.5 . . ?
C6 C9A H9A3 109.5 . . ?
H9A1 C9A H9A3 109.5 . . ?
H9A2 C9A H9A3 109.5 . . ?
C6 C7B H7B1 109.5 . . ?
C6 C7B H7B2 109.5 . . ?
H7B1 C7B H7B2 109.5 . . ?
C6 C7B H7B3 109.5 . . ?
H7B1 C7B H7B3 109.5 . . ?
H7B2 C7B H7B3 109.5 . . ?
C6 C9B H9B1 109.5 . . ?
C6 C9B H9B2 109.5 . . ?
H9B1 C9B H9B2 109.5 . . ?
C6 C9B H9B3 109.5 . . ?
H9B1 C9B H9B3 109.5 . . ?
H9B2 C9B H9B3 109.5 . . ?
C6 C8B H8B1 109.5 . . ?
C6 C8B H8B2 109.5 . . ?
H8B1 C8B H8B2 109.5 . . ?
C6 C8B H8B3 109.5 . . ?
H8B1 C8B H8B3 109.5 . . ?
H8B2 C8B H8B3 109.5 . . ?
C5 C1 C2 108.9(4) . . ?
C5 C1 H1 125.5 . . ?
C2 C1 H1 125.5 . . ?
C3 C2 C1 107.6(4) . . ?
C3 C2 H2 126.2 . . ?
C1 C2 H2 126.2 . . ?
C2 C3 C4 108.5(4) . . ?
C2 C3 H3 125.8 . . ?
C4 C3 H3 125.8 . . ?
C3 C4 C5 108.5(4) . . ?
C3 C4 H4 125.7 . . ?
C5 C4 H4 125.7 . . ?
C1 C5 C4 106.5(4) . . ?
C1 C5 C6 127.7(4) . . ?
C4 C5 C6 125.6(3) . . ?
C5 C6 C8A 114.3(13) . . ?
C5 C6 C9B 112.5(8) . . ?
C8A C6 C9B 117.4(14) . . ?
C5 C6 C9A 107.3(11) . . ?
C8A C6 C9A 109.4(15) . . ?
C9B C6 C9A 15.8(12) . . ?
C5 C6 C8B 109.7(7) . . ?
C8A C6 C8B 15.0(12) . . ?
C9B C6 C8B 109.3(10) . . ?
C9A C6 C8B 98.6(12) . . ?
C5 C6 C7B 106.9(6) . . ?
C8A C6 C7B 91.6(9) . . ?
C9B C6 C7B 111.6(8) . . ?
C9A C6 C7B 126.9(10) . . ?
C8B C6 C7B 106.5(7) . . ?
C5 C6 C7A 105.5(9) . . ?
C8A C6 C7A 113.0(11) . . ?
C9B C6 C7A 91.2(9) . . ?
C9A C6 C7A 107.0(11) . . ?
C8B C6 C7A 127.3(11) . . ?
C7B C6 C7A 24.0(8) . . ?
C14 C10 C11 108.7(5) . . ?
C14 C10 H10 125.6 . . ?
C11 C10 H10 125.6 . . ?
C10 C11 C12 106.9(5) . . ?
C10 C11 H11 126.6 . . ?
C12 C11 H11 126.6 . . ?
C13 C12 C11 107.8(5) . . ?
C13 C12 H12 126.1 . . ?
C11 C12 H12 126.1 . . ?
C14 C13 C12 107.0(5) . . ?
C14 C13 H13 126.5 . . ?
C12 C13 H13 126.5 . . ?
C10 C14 C13 109.6(5) . . ?
C10 C14 H14 125.2 . . ?
C13 C14 H14 125.2 . . ?
N1 C15 C17 175.1(4) . . ?
N2 C16 C17 175.3(4) . . ?
C18 C17 C16 123.2(3) . . ?
C18 C17 C15 124.0(3) . . ?
C16 C17 C15 112.7(3) . . ?
C17 C18 C19 123.9(3) . . ?
C17 C18 C20 123.4(3) . . ?
C19 C18 C20 112.7(3) . . ?
F1 C19 C21 117.3(3) . . ?
F1 C19 C18 118.5(3) . . ?
C21 C19 C18 124.1(3) . . ?
F2 C20 C22 118.2(3) . . ?
F2 C20 C18 118.7(3) . . ?
C22 C20 C18 123.1(3) . . ?
F3 C21 C19 118.1(3) . . ?
F3 C21 C23 118.8(3) . . ?
C19 C21 C23 123.1(3) . . ?
F4 C22 C20 117.4(3) . . ?
F4 C22 C23 118.6(3) . . ?
C20 C22 C23 124.0(3) . . ?
C21 C23 C22 112.9(3) . . ?
C21 C23 C24 123.4(3) . . ?
C22 C23 C24 123.7(3) . . ?
C26 C24 C23 123.1(4) . . ?
C26 C24 C25 112.8(3) . . ?
C23 C24 C25 123.9(3) . . ?
N3 C25 C24 174.2(4) . . ?
N4 C26 C24 174.4(5) . . ?
 
_diffrn_measured_fraction_theta_max    0.987
_diffrn_reflns_theta_full              26.15
_diffrn_measured_fraction_theta_full   0.987
_refine_diff_density_max    0.559
_refine_diff_density_min   -0.758
_refine_diff_density_rms    0.080
 
data_4-tPeF4
 
_audit_creation_method            SHELXL-97
_chemical_name_systematic
;
 ?
;
_chemical_name_common             ?
_chemical_melting_point           ?
_chemical_formula_moiety          'C12 F4 N4, C15 H20 Fe '
_chemical_formula_sum
 'C27 H20 F4 Fe N4'
_chemical_formula_weight          532.32
 
loop_
 _atom_type_symbol
 _atom_type_description
 _atom_type_scat_dispersion_real
 _atom_type_scat_dispersion_imag
 _atom_type_scat_source
 'C'  'C'   0.0033   0.0016
 'International Tables Vol C Tables 4.2.6.8 and 6.1.1.4'
 'H'  'H'   0.0000   0.0000
 'International Tables Vol C Tables 4.2.6.8 and 6.1.1.4'
 'N'  'N'   0.0061   0.0033
 'International Tables Vol C Tables 4.2.6.8 and 6.1.1.4'
 'F'  'F'   0.0171   0.0103
 'International Tables Vol C Tables 4.2.6.8 and 6.1.1.4'
 'Fe'  'Fe'   0.3463   0.8444
 'International Tables Vol C Tables 4.2.6.8 and 6.1.1.4'
 
_symmetry_cell_setting           'Triclinic'
_symmetry_space_group_name_H-M   'P -1'
_symmetry_space_group_name_Hall    '-P 1'
loop_
 _symmetry_equiv_pos_as_xyz
 'x, y, z'
 '-x, -y, -z'
 
_cell_length_a                    6.837(2)
_cell_length_b                    11.958(3)
_cell_length_c                    15.743(6)
_cell_angle_alpha                 67.695(5)
_cell_angle_beta                  85.907(6)
_cell_angle_gamma                 80.367(4)
_cell_volume                      1174.0(6)
_cell_formula_units_Z             2
_cell_measurement_temperature     90
_cell_measurement_reflns_used     1057
_cell_measurement_theta_min       2.71
_cell_measurement_theta_max       25.72
_exptl_crystal_description        'plate'
_exptl_crystal_colour             'black'
_exptl_crystal_size_max           0.38
_exptl_crystal_size_mid           0.13
_exptl_crystal_size_min           0.03
_exptl_crystal_density_meas       ?
_exptl_crystal_density_diffrn     1.506
_exptl_crystal_density_method     'not measured'
_exptl_crystal_F_000              544
_exptl_absorpt_coefficient_mu     0.698
_exptl_absorpt_correction_type    empirical
_exptl_absorpt_correction_T_min   0.7773
_exptl_absorpt_correction_T_max   0.9794
_exptl_absorpt_process_details    
;
SADABS Sheldrick 1996
;
_exptl_special_details
;
 ?
;
 
_diffrn_ambient_temperature       90
_diffrn_radiation_wavelength      0.71073
_diffrn_radiation_type            MoK\a
_diffrn_radiation_source          'Bruker TXS fine-focus rotating anode' 
_diffrn_radiation_monochromator   'Bruker Helios multilayer confocal mirror' 
_diffrn_measurement_device_type   'Bruker APEXII CCD area detector' 
_diffrn_measurement_method        'phi and omega scans' 
_diffrn_detector_area_resol_mean  8.333
_diffrn_standards_number          ?
_diffrn_standards_interval_count  ?
_diffrn_standards_interval_time   ?
_diffrn_standards_decay_%         ?
_diffrn_reflns_number             6139
_diffrn_reflns_av_R_equivalents   0.0372
_diffrn_reflns_av_unetI/netI     0.0813
_diffrn_reflns_limit_h_min        -8
_diffrn_reflns_limit_h_max        8
_diffrn_reflns_limit_k_min        -8
_diffrn_reflns_limit_k_max        14
_diffrn_reflns_limit_l_min        -13
_diffrn_reflns_limit_l_max        18
_diffrn_reflns_theta_min          2.72
_diffrn_reflns_theta_max          25.35
_reflns_number_total              4242
_reflns_number_gt                 2950
_reflns_threshold_expression      >2\s(I)
 
_computing_data_collection        'APEX2 (Bruker AXS, 2006)'
_computing_cell_refinement        'APEX2 (Bruker AXS, 2006)'
_computing_data_reduction         'SAINT (Bruker AXS, 2004)'
_computing_structure_solution     'SHELXS-97 (Sheldrick, 1997)'
_computing_structure_refinement   'SHELXL-97 (Sheldrick, 1997)'
_computing_molecular_graphics     'XSHEL (Bruker AXS,2002)'
_computing_publication_material   'XCIF (Bruker AXS, 2001)' 
_refine_special_details
;
 Refinement of F^2^ against ALL reflections.  The weighted R-factor wR and
 goodness of fit S are based on F^2^, conventional R-factors R are based
 on F, with F set to zero for negative F^2^. The threshold expression of
 F^2^ > 2\s(F^2^) is used only for calculating R-factors(gt) etc. and is
 not relevant to the choice of reflections for refinement.  R-factors based
 on F^2^ are statistically about twice as large as those based on F, and R-
 factors based on ALL data will be even larger.
 During the refinement, the restraint 'SIMU' and 'ISOR' were used to refine 
 the C3 atom with NPD and ADP problems.
;
 
_refine_ls_structure_factor_coef  Fsqd
_refine_ls_matrix_type            full
_refine_ls_weighting_scheme       calc
_refine_ls_weighting_details
 'calc w=1/[\s^2^(Fo^2^)+(0.0804P)^2^+0.0000P] where P=(Fo^2^+2Fc^2^)/3'
_atom_sites_solution_primary      direct
_atom_sites_solution_secondary    difmap
_atom_sites_solution_hydrogens    geom
_refine_ls_hydrogen_treatment     constr

_refine_ls_extinction_method      none
_refine_ls_extinction_coef        ?
_refine_ls_number_reflns          4242
_refine_ls_number_parameters      328
_refine_ls_number_restraints      6
_refine_ls_R_factor_all           0.0937
_refine_ls_R_factor_gt            0.0556
_refine_ls_wR_factor_ref          0.1463
_refine_ls_wR_factor_gt           0.1288
_refine_ls_goodness_of_fit_ref    1.017
_refine_ls_restrained_S_all       1.017
_refine_ls_shift/su_max           0.000
_refine_ls_shift/su_mean          0.000
 
loop_
 _atom_site_label
 _atom_site_type_symbol
 _atom_site_fract_x
 _atom_site_fract_y
 _atom_site_fract_z
 _atom_site_U_iso_or_equiv
 _atom_site_adp_type
 _atom_site_occupancy
 _atom_site_symmetry_multiplicity
 _atom_site_calc_flag
 _atom_site_refinement_flags
 _atom_site_disorder_assembly
 _atom_site_disorder_group
C1 C 0.4242(6) 0.8598(4) 0.3227(3) 0.0192(9) Uani 1 1 d . . .
C2 C 0.4043(6) 0.7363(4) 0.3799(3) 0.0224(10) Uani 1 1 d . . .
H2 H 0.4156 0.6700 0.3597 0.027 Uiso 1 1 calc R . .
C3 C 0.3651(6) 0.7285(4) 0.4714(3) 0.0266(11) Uani 1 1 d U . .
H3 H 0.3453 0.6567 0.5225 0.032 Uiso 1 1 calc R . .
C4 C 0.3602(6) 0.8477(4) 0.4736(3) 0.0254(10) Uani 1 1 d . . .
H4 H 0.3379 0.8691 0.5261 0.031 Uiso 1 1 calc R . .
C5 C 0.3953(6) 0.9281(4) 0.3818(3) 0.0230(10) Uani 1 1 d . . .
H5 H 0.3989 1.0132 0.3628 0.028 Uiso 1 1 calc R . .
C6 C 0.9270(6) 0.7756(4) 0.3759(3) 0.0244(10) Uani 1 1 d . . .
H6 H 0.9620 0.7957 0.3130 0.029 Uiso 1 1 calc R . .
C7 C 0.8915(6) 0.6595(4) 0.4388(3) 0.0243(10) Uani 1 1 d . . .
H7 H 0.8974 0.5880 0.4252 0.029 Uiso 1 1 calc R . .
C8 C 0.8458(6) 0.6681(4) 0.5252(3) 0.0254(10) Uani 1 1 d . . .
H8 H 0.8164 0.6031 0.5798 0.030 Uiso 1 1 calc R . .
C9 C 0.8509(6) 0.7895(4) 0.5171(3) 0.0257(10) Uani 1 1 d . . .
H9 H 0.8258 0.8208 0.5646 0.031 Uiso 1 1 calc R . .
C10 C 0.9012(6) 0.8562(4) 0.4233(3) 0.0285(11) Uani 1 1 d . . .
H10 H 0.9148 0.9404 0.3975 0.034 Uiso 1 1 calc R . .
C11 C 0.4574(6) 0.9102(4) 0.2198(3) 0.0188(9) Uani 1 1 d . . .
C12 C 0.5788(7) 1.0168(4) 0.1917(3) 0.0253(10) Uani 1 1 d . . .
H12A H 0.5066 1.0822 0.2100 0.038 Uiso 1 1 calc R . .
H12B H 0.5993 1.0483 0.1250 0.038 Uiso 1 1 calc R . .
H12C H 0.7077 0.9875 0.2223 0.038 Uiso 1 1 calc R . .
C13 C 0.5668(6) 0.8101(4) 0.1875(3) 0.0247(10) Uani 1 1 d . . .
H13A H 0.6921 0.7746 0.2206 0.037 Uiso 1 1 calc R . .
H13B H 0.5940 0.8457 0.1215 0.037 Uiso 1 1 calc R . .
H13C H 0.4840 0.7461 0.1999 0.037 Uiso 1 1 calc R . .
C14 C 0.2457(6) 0.9558(4) 0.1769(3) 0.0258(10) Uani 1 1 d . . .
H14A H 0.1724 0.8853 0.1965 0.031 Uiso 1 1 calc R . .
H14B H 0.1744 1.0153 0.2025 0.031 Uiso 1 1 calc R . .
C15 C 0.2392(7) 1.0157(4) 0.0724(3) 0.0316(11) Uani 1 1 d . . .
H15A H 0.3045 1.0886 0.0520 0.047 Uiso 1 1 calc R . .
H15B H 0.1008 1.0392 0.0524 0.047 Uiso 1 1 calc R . .
H15C H 0.3081 0.9577 0.0459 0.047 Uiso 1 1 calc R . .
Fe1 Fe 0.63623(8) 0.78664(5) 0.43078(4) 0.0172(2) Uani 1 1 d . . .
C16 C 0.8081(6) 0.4110(4) 0.1172(3) 0.0185(9) Uani 1 1 d . . .
C17 C 0.7535(6) 0.5348(4) 0.0586(3) 0.0189(9) Uani 1 1 d . . .
C18 C 0.7314(6) 0.5731(4) -0.0330(3) 0.0188(9) Uani 1 1 d . . .
C19 C 0.7605(6) 0.4931(4) -0.0823(3) 0.0188(9) Uani 1 1 d . . .
C20 C 0.8118(6) 0.3679(4) -0.0236(3) 0.0205(9) Uani 1 1 d . . .
C21 C 0.8336(6) 0.3290(4) 0.0686(3) 0.0194(9) Uani 1 1 d . . .
C22 C 0.8354(6) 0.3714(4) 0.2130(3) 0.0194(9) Uani 1 1 d . . .
C23 C 0.7431(6) 0.5333(4) -0.1782(3) 0.0213(10) Uani 1 1 d . . .
C24 C 0.9037(6) 0.2463(4) 0.2695(3) 0.0208(10) Uani 1 1 d . . .
C25 C 0.7738(6) 0.4458(4) 0.2660(3) 0.0207(10) Uani 1 1 d . . .
C26 C 0.6601(6) 0.6553(4) -0.2367(3) 0.0204(10) Uani 1 1 d . . .
C27 C 0.7926(6) 0.4530(4) -0.2278(3) 0.0206(9) Uani 1 1 d . . .
N1 N 0.9608(6) 0.1489(3) 0.3202(3) 0.0283(9) Uani 1 1 d . . .
N2 N 0.7249(6) 0.4968(3) 0.3148(3) 0.0283(9) Uani 1 1 d . . .
N3 N 0.5933(5) 0.7498(3) -0.2874(3) 0.0247(9) Uani 1 1 d . . .
N4 N 0.8331(6) 0.3955(3) -0.2721(3) 0.0291(9) Uani 1 1 d . . .
F1 F 0.7275(4) 0.6205(2) 0.09728(17) 0.0272(6) Uani 1 1 d . . .
F2 F 0.6839(4) 0.6943(2) -0.08112(16) 0.0271(6) Uani 1 1 d . . .
F3 F 0.8360(4) 0.2826(2) -0.06138(17) 0.0294(6) Uani 1 1 d . . .
F4 F 0.8822(4) 0.2094(2) 0.11635(17) 0.0271(6) Uani 1 1 d . . .
 
loop_
 _atom_site_aniso_label
 _atom_site_aniso_U_11
 _atom_site_aniso_U_22
 _atom_site_aniso_U_33
 _atom_site_aniso_U_23
 _atom_site_aniso_U_13
 _atom_site_aniso_U_12
C1 0.012(2) 0.017(2) 0.027(3) -0.0057(19) -0.0014(17) -0.0022(16)
C2 0.009(2) 0.027(2) 0.030(3) -0.007(2) -0.0019(18) -0.0081(17)
C3 0.009(2) 0.036(3) 0.032(3) -0.006(2) 0.0003(18) -0.0114(17)
C4 0.008(2) 0.037(3) 0.031(3) -0.014(2) 0.0022(18) 0.0011(18)
C5 0.011(2) 0.026(2) 0.027(3) -0.008(2) 0.0005(18) 0.0033(17)
C6 0.008(2) 0.031(3) 0.033(3) -0.011(2) 0.0029(18) -0.0021(17)
C7 0.012(2) 0.022(2) 0.038(3) -0.011(2) -0.0008(19) -0.0021(17)
C8 0.018(2) 0.022(2) 0.029(3) -0.001(2) -0.0013(19) -0.0041(17)
C9 0.014(2) 0.033(3) 0.032(3) -0.016(2) -0.0050(19) -0.0010(18)
C10 0.010(2) 0.024(2) 0.053(3) -0.015(2) 0.000(2) -0.0056(17)
C11 0.014(2) 0.020(2) 0.022(2) -0.0058(18) 0.0023(17) -0.0072(16)
C12 0.026(2) 0.022(2) 0.027(3) -0.005(2) 0.007(2) -0.0111(18)
C13 0.024(2) 0.023(2) 0.027(3) -0.008(2) 0.0070(19) -0.0083(18)
C14 0.019(2) 0.033(3) 0.025(3) -0.009(2) -0.0024(19) -0.0051(19)
C15 0.024(3) 0.036(3) 0.033(3) -0.011(2) -0.004(2) 0.000(2)
Fe1 0.0092(3) 0.0188(3) 0.0241(4) -0.0077(3) 0.0035(2) -0.0056(2)
C16 0.008(2) 0.020(2) 0.028(3) -0.0087(19) 0.0025(17) -0.0068(16)
C17 0.013(2) 0.020(2) 0.027(3) -0.0130(19) 0.0056(17) -0.0066(16)
C18 0.014(2) 0.019(2) 0.024(3) -0.0084(19) 0.0044(17) -0.0062(16)
C19 0.009(2) 0.024(2) 0.026(3) -0.0109(19) 0.0050(17) -0.0074(16)
C20 0.014(2) 0.022(2) 0.031(3) -0.014(2) 0.0043(18) -0.0089(17)
C21 0.013(2) 0.017(2) 0.027(3) -0.0053(19) 0.0039(17) -0.0057(16)
C22 0.015(2) 0.021(2) 0.023(2) -0.0072(19) 0.0041(17) -0.0090(16)
C23 0.015(2) 0.023(2) 0.028(3) -0.0098(19) 0.0054(18) -0.0103(17)
C24 0.017(2) 0.027(3) 0.023(3) -0.012(2) 0.0010(18) -0.0100(18)
C25 0.019(2) 0.018(2) 0.021(2) -0.0002(19) 0.0021(18) -0.0068(17)
C26 0.012(2) 0.029(3) 0.025(3) -0.012(2) 0.0078(18) -0.0121(18)
C27 0.019(2) 0.022(2) 0.022(2) -0.007(2) 0.0032(18) -0.0103(17)
N1 0.030(2) 0.021(2) 0.032(2) -0.0064(19) -0.0041(18) -0.0094(17)
N2 0.035(2) 0.022(2) 0.027(2) -0.0076(18) 0.0079(18) -0.0085(17)
N3 0.022(2) 0.025(2) 0.026(2) -0.0072(18) 0.0032(16) -0.0068(16)
N4 0.030(2) 0.031(2) 0.030(2) -0.0127(19) 0.0063(18) -0.0138(17)
F1 0.0375(15) 0.0202(13) 0.0266(14) -0.0127(11) 0.0016(11) -0.0033(11)
F2 0.0368(15) 0.0155(13) 0.0266(15) -0.0055(11) 0.0008(12) -0.0032(11)
F3 0.0416(16) 0.0207(13) 0.0298(15) -0.0128(11) -0.0011(12) -0.0067(11)
F4 0.0360(15) 0.0160(12) 0.0271(15) -0.0043(11) -0.0017(11) -0.0065(10)
 
_geom_special_details
;
 All s.u.'s (except the s.u. in the dihedral angle between two l.s. planes)
 are estimated using the full covariance matrix.  The cell s.u.'s are taken
 into account individually in the estimation of s.u.'s in distances, angles
 and torsion angles; correlations between s.u.'s in cell parameters are only
 used when they are defined by crystal symmetry.  An approximate (isotropic)
 treatment of cell s.u.'s is used for estimating s.u.'s involving l.s. planes.
;
 
loop_
 _geom_bond_atom_site_label_1
 _geom_bond_atom_site_label_2
 _geom_bond_distance
 _geom_bond_site_symmetry_2
 _geom_bond_publ_flag
C1 C2 1.432(6) . ?
C1 C5 1.438(6) . ?
C1 C11 1.514(6) . ?
C2 C3 1.416(6) . ?
C2 H2 0.9500 . ?
C3 C4 1.433(6) . ?
C3 H3 0.9500 . ?
C4 C5 1.429(6) . ?
C4 H4 0.9500 . ?
C5 H5 0.9500 . ?
C6 C10 1.409(6) . ?
C6 C7 1.415(6) . ?
C6 H6 0.9500 . ?
C7 C8 1.412(6) . ?
C7 H7 0.9500 . ?
C8 C9 1.414(6) . ?
C8 H8 0.9500 . ?
C9 C10 1.435(6) . ?
C9 H9 0.9500 . ?
C10 H10 0.9500 . ?
C11 C13 1.536(6) . ?
C11 C12 1.544(6) . ?
C11 C14 1.563(6) . ?
C12 H12A 0.9800 . ?
C12 H12B 0.9800 . ?
C12 H12C 0.9800 . ?
C13 H13A 0.9800 . ?
C13 H13B 0.9800 . ?
C13 H13C 0.9800 . ?
C14 C15 1.525(6) . ?
C14 H14A 0.9900 . ?
C14 H14B 0.9900 . ?
C15 H15A 0.9800 . ?
C15 H15B 0.9800 . ?
C15 H15C 0.9800 . ?
C16 C22 1.415(6) . ?
C16 C17 1.418(6) . ?
C16 C21 1.439(6) . ?
C17 C18 1.349(6) . ?
C17 F1 1.359(5) . ?
C18 F2 1.350(4) . ?
C18 C19 1.426(6) . ?
C19 C23 1.409(6) . ?
C19 C20 1.428(6) . ?
C20 F3 1.346(5) . ?
C20 C21 1.356(6) . ?
C21 F4 1.335(4) . ?
C22 C25 1.433(6) . ?
C22 C24 1.436(6) . ?
C23 C27 1.439(6) . ?
C23 C26 1.441(6) . ?
C24 N1 1.155(5) . ?
C25 N2 1.151(6) . ?
C26 N3 1.148(5) . ?
C27 N4 1.143(5) . ?
 
loop_
 _geom_angle_atom_site_label_1
 _geom_angle_atom_site_label_2
 _geom_angle_atom_site_label_3
 _geom_angle
 _geom_angle_site_symmetry_1
 _geom_angle_site_symmetry_3
 _geom_angle_publ_flag
C2 C1 C5 106.2(4) . . ?
C2 C1 C11 127.0(4) . . ?
C5 C1 C11 126.7(4) . . ?
C3 C2 C1 109.2(4) . . ?
C3 C2 H2 125.4 . . ?
C1 C2 H2 125.4 . . ?
C2 C3 C4 108.3(4) . . ?
C2 C3 H3 125.9 . . ?
C4 C3 H3 125.9 . . ?
C5 C4 C3 107.0(4) . . ?
C5 C4 H4 126.5 . . ?
C3 C4 H4 126.5 . . ?
C4 C5 C1 109.2(4) . . ?
C4 C5 H5 125.4 . . ?
C1 C5 H5 125.4 . . ?
C10 C6 C7 107.9(4) . . ?
C10 C6 H6 126.1 . . ?
C7 C6 H6 126.1 . . ?
C8 C7 C6 108.2(4) . . ?
C8 C7 H7 125.9 . . ?
C6 C7 H7 125.9 . . ?
C7 C8 C9 108.7(4) . . ?
C7 C8 H8 125.7 . . ?
C9 C8 H8 125.7 . . ?
C8 C9 C10 106.9(4) . . ?
C8 C9 H9 126.6 . . ?
C10 C9 H9 126.6 . . ?
C6 C10 C9 108.4(4) . . ?
C6 C10 H10 125.8 . . ?
C9 C10 H10 125.8 . . ?
C1 C11 C13 110.8(3) . . ?
C1 C11 C12 110.4(3) . . ?
C13 C11 C12 109.4(3) . . ?
C1 C11 C14 105.6(3) . . ?
C13 C11 C14 109.9(4) . . ?
C12 C11 C14 110.7(3) . . ?
C11 C12 H12A 109.5 . . ?
C11 C12 H12B 109.5 . . ?
H12A C12 H12B 109.5 . . ?
C11 C12 H12C 109.5 . . ?
H12A C12 H12C 109.5 . . ?
H12B C12 H12C 109.5 . . ?
C11 C13 H13A 109.5 . . ?
C11 C13 H13B 109.5 . . ?
H13A C13 H13B 109.5 . . ?
C11 C13 H13C 109.5 . . ?
H13A C13 H13C 109.5 . . ?
H13B C13 H13C 109.5 . . ?
C15 C14 C11 115.8(4) . . ?
C15 C14 H14A 108.3 . . ?
C11 C14 H14A 108.3 . . ?
C15 C14 H14B 108.3 . . ?
C11 C14 H14B 108.3 . . ?
H14A C14 H14B 107.4 . . ?
C14 C15 H15A 109.5 . . ?
C14 C15 H15B 109.5 . . ?
H15A C15 H15B 109.5 . . ?
C14 C15 H15C 109.5 . . ?
H15A C15 H15C 109.5 . . ?
H15B C15 H15C 109.5 . . ?
C22 C16 C17 124.0(4) . . ?
C22 C16 C21 123.3(4) . . ?
C17 C16 C21 112.7(4) . . ?
C18 C17 F1 118.1(4) . . ?
C18 C17 C16 124.2(4) . . ?
F1 C17 C16 117.7(4) . . ?
C17 C18 F2 118.2(4) . . ?
C17 C18 C19 123.7(4) . . ?
F2 C18 C19 118.1(4) . . ?
C23 C19 C18 123.8(4) . . ?
C23 C19 C20 123.7(4) . . ?
C18 C19 C20 112.5(4) . . ?
F3 C20 C21 117.7(4) . . ?
F3 C20 C19 118.3(4) . . ?
C21 C20 C19 124.0(4) . . ?
F4 C21 C20 118.6(4) . . ?
F4 C21 C16 118.4(4) . . ?
C20 C21 C16 122.9(4) . . ?
C16 C22 C25 124.4(4) . . ?
C16 C22 C24 122.7(4) . . ?
C25 C22 C24 112.3(4) . . ?
C19 C23 C27 123.0(4) . . ?
C19 C23 C26 124.5(4) . . ?
C27 C23 C26 112.4(4) . . ?
N1 C24 C22 174.7(5) . . ?
N2 C25 C22 174.5(4) . . ?
N3 C26 C23 175.8(5) . . ?
N4 C27 C23 175.7(5) . . ?
 
_diffrn_measured_fraction_theta_max    0.988
_diffrn_reflns_theta_full              25.35
_diffrn_measured_fraction_theta_full   0.988
_refine_diff_density_max    0.759
_refine_diff_density_min   -0.856
_refine_diff_density_rms    0.100
 
data_5-tBuF2
 
_audit_creation_method            SHELXL-97
_chemical_name_systematic
;
 ?
;
_chemical_name_common             ?
_chemical_melting_point           ?
_chemical_formula_moiety          ' C14 H18 Fe, 2(C12 H2 F2 N4) '
_chemical_formula_sum
 'C38 H22 F4 Fe N8'
_chemical_formula_weight          722.49
 
loop_
 _atom_type_symbol
 _atom_type_description
 _atom_type_scat_dispersion_real
 _atom_type_scat_dispersion_imag
 _atom_type_scat_source
 'C'  'C'   0.0033   0.0016
 'International Tables Vol C Tables 4.2.6.8 and 6.1.1.4'
 'H'  'H'   0.0000   0.0000
 'International Tables Vol C Tables 4.2.6.8 and 6.1.1.4'
 'N'  'N'   0.0061   0.0033
 'International Tables Vol C Tables 4.2.6.8 and 6.1.1.4'
 'F'  'F'   0.0171   0.0103
 'International Tables Vol C Tables 4.2.6.8 and 6.1.1.4'
 'Fe'  'Fe'   0.3463   0.8444
 'International Tables Vol C Tables 4.2.6.8 and 6.1.1.4'
 
_symmetry_cell_setting           'Triclinic'
_symmetry_space_group_name_H-M   'P -1'
_symmetry_space_group_name_Hall    '-P 1'
loop_
 _symmetry_equiv_pos_as_xyz
 'x, y, z'
 '-x, -y, -z'
 
_cell_length_a                    8.7871(13)
_cell_length_b                    12.7926(19)
_cell_length_c                    15.286(2)
_cell_angle_alpha                 90.751(3)
_cell_angle_beta                  104.949(2)
_cell_angle_gamma                 90.639(2)
_cell_volume                      1659.8(4)
_cell_formula_units_Z             2
_cell_measurement_temperature     173
_cell_measurement_reflns_used    1417
_cell_measurement_theta_min        2.44
_cell_measurement_theta_max       24.43
_exptl_crystal_description        'prism'
_exptl_crystal_colour             'black'
_exptl_crystal_size_max           0.30
_exptl_crystal_size_mid           0.10
_exptl_crystal_size_min           0.05
_exptl_crystal_density_meas       ?
_exptl_crystal_density_diffrn     1.446
_exptl_crystal_density_method     'not measured'
_exptl_crystal_F_000              736
_exptl_absorpt_coefficient_mu     0.519
_exptl_absorpt_correction_type    empirical
_exptl_absorpt_correction_T_min   0.8600
_exptl_absorpt_correction_T_max   0.9745
_exptl_absorpt_process_details    
;
SADABS Sheldrick 1996
;
_exptl_special_details
;
 ?
;
 
_diffrn_ambient_temperature       173
_diffrn_radiation_wavelength      0.71073
_diffrn_radiation_type            MoK\a
_diffrn_radiation_source          'Bruker TXS fine-focus rotating anode' 
_diffrn_radiation_monochromator   'Bruker Helios multilayer confocal mirror' 
_diffrn_measurement_device_type   'Bruker APEXII CCD area detector' 
_diffrn_measurement_method        'phi and omega scans' 
_diffrn_detector_area_resol_mean  8.333
_diffrn_standards_number          ?
_diffrn_standards_interval_count  ?
_diffrn_standards_interval_time   ?
_diffrn_standards_decay_%         ?
_diffrn_reflns_number             9345
_diffrn_reflns_av_R_equivalents   0.0395
_diffrn_reflns_av_unetI/netI     0.1095
_diffrn_reflns_limit_h_min        -10
_diffrn_reflns_limit_h_max        10
_diffrn_reflns_limit_k_min        -15
_diffrn_reflns_limit_k_max        9
_diffrn_reflns_limit_l_min        -18
_diffrn_reflns_limit_l_max        15
_diffrn_reflns_theta_min          2.09
_diffrn_reflns_theta_max          26.02
_reflns_number_total              6464
_reflns_number_gt                 3662
_reflns_threshold_expression      >2\s(I)
 
_computing_data_collection        'APEX2 (Bruker AXS, 2006)'
_computing_cell_refinement        'APEX2 (Bruker AXS, 2006)'
_computing_data_reduction         'SAINT (Bruker AXS, 2004)'
_computing_structure_solution     'SHELXS-97 (Sheldrick, 1997)'
_computing_structure_refinement   'SHELXL-97 (Sheldrick, 1997)'
_computing_molecular_graphics     'XSHEL (Bruker AXS,2002)'
_computing_publication_material   'XCIF (Bruker AXS, 2001)' 
_refine_special_details
;
 Refinement of F^2^ against ALL reflections.  The weighted R-factor wR and
 goodness of fit S are based on F^2^, conventional R-factors R are based
 on F, with F set to zero for negative F^2^. The threshold expression of
 F^2^ > 2\s(F^2^) is used only for calculating R-factors(gt) etc. and is
 not relevant to the choice of reflections for refinement.  R-factors based
 on F^2^ are statistically about twice as large as those based on F, and R-
 factors based on ALL data will be even larger.
 During the refinement, the restraint commands 'SADI' was also used to refine 
 the distances of C-C bonds in the disorder of tert-butyl group. 
 The restraint command 'SIMU' and 'ISOR' was also used to refine the non-H 
 atoms with NPD and ADP problems. These atoms are as follows: C12A C13A 
 C14A C12B C13B C14B C14C C11 C10 C7 C6
;
 
_refine_ls_structure_factor_coef  Fsqd
_refine_ls_matrix_type            full
_refine_ls_weighting_scheme       calc
_refine_ls_weighting_details
 'calc w=1/[\s^2^(Fo^2^)+(0.0529P)^2^+0.0000P] where P=(Fo^2^+2Fc^2^)/3'
_atom_sites_solution_primary      direct
_atom_sites_solution_secondary    difmap
_atom_sites_solution_hydrogens    geom
_refine_ls_hydrogen_treatment     constr

_refine_ls_extinction_method      none
_refine_ls_extinction_coef        ?
_refine_ls_number_reflns          6464
_refine_ls_number_parameters      500
_refine_ls_number_restraints      184
_refine_ls_R_factor_all           0.1322
_refine_ls_R_factor_gt            0.0665
_refine_ls_wR_factor_ref          0.1406
_refine_ls_wR_factor_gt           0.1188
_refine_ls_goodness_of_fit_ref    0.999
_refine_ls_restrained_S_all       1.006
_refine_ls_shift/su_max           0.000
_refine_ls_shift/su_mean          0.000
 
loop_
 _atom_site_label
 _atom_site_type_symbol
 _atom_site_fract_x
 _atom_site_fract_y
 _atom_site_fract_z
 _atom_site_U_iso_or_equiv
 _atom_site_adp_type
 _atom_site_occupancy
 _atom_site_symmetry_multiplicity
 _atom_site_calc_flag
 _atom_site_refinement_flags
 _atom_site_disorder_assembly
 _atom_site_disorder_group
C12A C 0.9694(13) 0.7610(13) 0.6613(6) 0.072(3) Uani 0.78(3) 1 d PDU A 1
H12A H 1.0628 0.7467 0.7105 0.108 Uiso 0.78(3) 1 calc PR A 1
H12B H 0.9054 0.6970 0.6454 0.108 Uiso 0.78(3) 1 calc PR A 1
H12C H 0.9071 0.8153 0.6811 0.108 Uiso 0.78(3) 1 calc PR A 1
C13A C 1.1146(15) 0.7114(10) 0.5483(9) 0.071(3) Uani 0.78(3) 1 d PDU A 1
H13A H 1.2087 0.6976 0.5972 0.106 Uiso 0.78(3) 1 calc PR A 1
H13B H 1.1462 0.7328 0.4942 0.106 Uiso 0.78(3) 1 calc PR A 1
H13C H 1.0490 0.6479 0.5346 0.106 Uiso 0.78(3) 1 calc PR A 1
C14A C 1.120(5) 0.901(2) 0.596(4) 0.056(5) Uani 0.35(3) 1 d PDU A 1
H14A H 1.2162 0.8906 0.6440 0.084 Uiso 0.35(3) 1 calc PR A 1
H14B H 1.0587 0.9571 0.6136 0.084 Uiso 0.35(3) 1 calc PR A 1
H14C H 1.1490 0.9210 0.5401 0.084 Uiso 0.35(3) 1 calc PR A 1
C12B C 0.992(4) 0.805(4) 0.6728(11) 0.053(6) Uani 0.22(3) 1 d PDU A 2
H12D H 1.0898 0.7906 0.7185 0.079 Uiso 0.22(3) 1 calc PR A 2
H12E H 0.9107 0.7537 0.6770 0.079 Uiso 0.22(3) 1 calc PR A 2
H12F H 0.9564 0.8755 0.6834 0.079 Uiso 0.22(3) 1 calc PR A 2
C13B C 1.091(5) 0.6910(18) 0.566(3) 0.053(7) Uani 0.22(3) 1 d PDU A 2
H13D H 1.1846 0.6802 0.6165 0.080 Uiso 0.22(3) 1 calc PR A 2
H13E H 1.1206 0.6882 0.5089 0.080 Uiso 0.22(3) 1 calc PR A 2
H13F H 1.0125 0.6360 0.5666 0.080 Uiso 0.22(3) 1 calc PR A 2
C14B C 1.147(2) 0.881(2) 0.568(2) 0.062(5) Uani 0.39(5) 1 d PDU A 2
H14D H 1.2442 0.8708 0.6149 0.093 Uiso 0.39(5) 1 calc PR A 2
H14E H 1.1075 0.9514 0.5735 0.093 Uiso 0.39(5) 1 calc PR A 2
H14F H 1.1672 0.8722 0.5079 0.093 Uiso 0.39(5) 1 calc PR A 2
C14C C 1.072(5) 0.9050(12) 0.628(2) 0.061(5) Uani 0.26(4) 1 d PDU A 3
H14G H 1.1669 0.8951 0.6775 0.091 Uiso 0.26(4) 1 calc PR A 3
H14H H 0.9873 0.9314 0.6524 0.091 Uiso 0.26(4) 1 calc PR A 3
H14I H 1.0957 0.9554 0.5852 0.091 Uiso 0.26(4) 1 calc PR A 3
C1 C 0.8735(5) 0.8209(3) 0.5026(3) 0.0375(11) Uani 1 1 d . A .
C2 C 0.8596(5) 0.8072(3) 0.4090(3) 0.0420(12) Uani 1 1 d . . .
H2 H 0.9372 0.7777 0.3833 0.050 Uiso 1 1 calc R . .
C3 C 0.7116(5) 0.8444(3) 0.3596(3) 0.0435(12) Uani 1 1 d . . .
H3 H 0.6718 0.8442 0.2957 0.052 Uiso 1 1 calc R . .
C4 C 0.6344(6) 0.8819(3) 0.4239(3) 0.0462(13) Uani 1 1 d . . .
H4 H 0.5326 0.9117 0.4105 0.055 Uiso 1 1 calc R . .
C5 C 0.7328(5) 0.8680(3) 0.5106(3) 0.0443(12) Uani 1 1 d . . .
H5 H 0.7091 0.8870 0.5658 0.053 Uiso 1 1 calc R . .
C6 C 0.6931(6) 0.5773(4) 0.4996(4) 0.0635(16) Uani 1 1 d U . .
H6 H 0.7777 0.5543 0.5474 0.076 Uiso 1 1 calc R . .
C7 C 0.6817(6) 0.5670(4) 0.4092(4) 0.0628(15) Uani 1 1 d U . .
H7 H 0.7579 0.5357 0.3835 0.075 Uiso 1 1 calc R . .
C8 C 0.5434(7) 0.6089(4) 0.3617(4) 0.0617(16) Uani 1 1 d . . .
H8 H 0.5081 0.6121 0.2976 0.074 Uiso 1 1 calc R . .
C9 C 0.4639(6) 0.6456(4) 0.4215(4) 0.0553(15) Uani 1 1 d . . .
H9 H 0.3635 0.6774 0.4058 0.066 Uiso 1 1 calc R . .
C10 C 0.5551(7) 0.6286(4) 0.5096(4) 0.0651(16) Uani 1 1 d U . .
H10 H 0.5303 0.6473 0.5646 0.078 Uiso 1 1 calc R . .
C11 C 1.0208(5) 0.7988(3) 0.5781(3) 0.0515(14) Uani 1 1 d DU . .
C15 C 1.0411(4) 0.8571(3) 0.0888(3) 0.0267(9) Uani 1 1 d . . .
C16 C 1.0512(5) 0.8657(3) -0.0022(3) 0.0292(10) Uani 1 1 d . . .
H16 H 1.1511 0.8612 -0.0151 0.035 Uiso 1 1 calc R . .
C17 C 0.9215(5) 0.8800(3) -0.0703(3) 0.0263(9) Uani 1 1 d . . .
C18 C 0.7648(4) 0.8854(3) -0.0573(3) 0.0270(10) Uani 1 1 d . . .
C19 C 0.7551(4) 0.8755(3) 0.0338(3) 0.0276(10) Uani 1 1 d . . .
H19 H 0.6553 0.8780 0.0469 0.033 Uiso 1 1 calc R . .
C20 C 0.8857(4) 0.8626(3) 0.1013(3) 0.0258(9) Uani 1 1 d . . .
C21 C 1.1758(4) 0.8455(3) 0.1611(3) 0.0285(10) Uani 1 1 d . . .
C22 C 0.6308(4) 0.8992(3) -0.1283(3) 0.0293(10) Uani 1 1 d . . .
C23 C 1.1772(5) 0.8399(3) 0.2533(3) 0.0350(11) Uani 1 1 d . . .
C24 C 1.3276(5) 0.8393(3) 0.1429(3) 0.0320(10) Uani 1 1 d . . .
C25 C 0.6268(5) 0.9124(3) -0.2203(3) 0.0339(11) Uani 1 1 d . . .
C26 C 0.4797(5) 0.9039(3) -0.1092(3) 0.0314(10) Uani 1 1 d . . .
C27 C 0.9042(4) 0.6076(3) 0.1017(3) 0.0253(9) Uani 1 1 d . . .
C28 C 0.9159(4) 0.6227(3) 0.0117(3) 0.0241(9) Uani 1 1 d . . .
H28 H 1.0166 0.6226 -0.0005 0.029 Uiso 1 1 calc R . .
C29 C 0.7866(4) 0.6371(3) -0.0563(3) 0.0240(9) Uani 1 1 d . . .
C30 C 0.6295(4) 0.6373(3) -0.0454(3) 0.0249(9) Uani 1 1 d . . .
C31 C 0.6189(4) 0.6254(3) 0.0453(3) 0.0283(10) Uani 1 1 d . . .
H31 H 0.5185 0.6274 0.0578 0.034 Uiso 1 1 calc R . .
C32 C 0.7473(4) 0.6115(3) 0.1133(3) 0.0284(10) Uani 1 1 d . . .
C33 C 1.0377(4) 0.5912(3) 0.1731(3) 0.0280(10) Uani 1 1 d . . .
C34 C 0.4966(4) 0.6482(3) -0.1168(3) 0.0279(10) Uani 1 1 d . . .
C35 C 1.0364(5) 0.5717(3) 0.2636(3) 0.0374(11) Uani 1 1 d . . .
C36 C 1.1897(5) 0.5882(3) 0.1553(3) 0.0301(10) Uani 1 1 d . . .
C37 C 0.4954(5) 0.6535(3) -0.2089(3) 0.0334(11) Uani 1 1 d . . .
C38 C 0.3436(5) 0.6490(3) -0.0990(3) 0.0314(10) Uani 1 1 d . . .
N1 N 1.1903(4) 0.8333(3) 0.3293(3) 0.0566(12) Uani 1 1 d . . .
N2 N 1.4501(4) 0.8346(3) 0.1309(3) 0.0435(10) Uani 1 1 d . . .
N3 N 0.6145(4) 0.9258(3) -0.2958(3) 0.0535(11) Uani 1 1 d . . .
N4 N 0.3584(4) 0.9082(3) -0.0942(3) 0.0462(10) Uani 1 1 d . . .
N5 N 1.0435(4) 0.5558(3) 0.3382(3) 0.0562(12) Uani 1 1 d . . .
N6 N 1.3120(4) 0.5857(2) 0.1423(2) 0.0382(9) Uani 1 1 d . . .
N7 N 0.4863(4) 0.6572(3) -0.2847(3) 0.0525(11) Uani 1 1 d . . .
N8 N 0.2201(4) 0.6484(3) -0.0859(3) 0.0467(10) Uani 1 1 d . . .
F1 F 0.9353(2) 0.88972(17) -0.15449(16) 0.0382(6) Uani 1 1 d . . .
F2 F 0.8709(3) 0.85380(18) 0.18621(16) 0.0403(6) Uani 1 1 d . . .
F3 F 0.8034(2) 0.65150(16) -0.14018(15) 0.0318(6) Uani 1 1 d . . .
F4 F 0.7319(3) 0.59908(19) 0.19769(17) 0.0440(7) Uani 1 1 d . . .
Fe1 Fe 0.67682(7) 0.72487(5) 0.44256(4) 0.0320(2) Uani 1 1 d U . .
 
loop_
 _atom_site_aniso_label
 _atom_site_aniso_U_11
 _atom_site_aniso_U_22
 _atom_site_aniso_U_33
 _atom_site_aniso_U_23
 _atom_site_aniso_U_13
 _atom_site_aniso_U_12
C12A 0.083(5) 0.075(6) 0.047(4) -0.016(4) -0.005(4) 0.027(5)
C13A 0.042(5) 0.099(5) 0.074(6) 0.025(4) 0.015(4) 0.022(5)
C14A 0.047(7) 0.055(7) 0.060(8) -0.010(6) 0.003(6) -0.016(6)
C12B 0.051(8) 0.051(9) 0.050(8) -0.005(7) 0.003(7) 0.000(7)
C13B 0.038(9) 0.063(9) 0.060(10) 0.006(8) 0.016(7) 0.005(7)
C14B 0.051(7) 0.064(7) 0.064(8) -0.010(6) 0.001(6) -0.012(6)
C14C 0.054(8) 0.064(7) 0.057(8) 0.003(6) 0.001(6) -0.008(6)
C1 0.036(3) 0.032(2) 0.041(3) 0.0021(19) 0.003(2) -0.0058(19)
C2 0.035(3) 0.045(3) 0.048(3) 0.004(2) 0.014(2) -0.008(2)
C3 0.036(3) 0.049(3) 0.043(3) 0.012(2) 0.006(2) -0.007(2)
C4 0.046(3) 0.038(3) 0.055(4) 0.006(2) 0.013(3) 0.007(2)
C5 0.051(3) 0.035(3) 0.046(3) -0.005(2) 0.010(3) 0.003(2)
C6 0.053(3) 0.052(3) 0.072(4) 0.025(3) -0.008(3) -0.016(2)
C7 0.047(3) 0.049(3) 0.096(4) -0.005(3) 0.025(3) -0.002(2)
C8 0.064(4) 0.064(4) 0.052(4) -0.003(3) 0.007(3) -0.030(3)
C9 0.028(3) 0.055(3) 0.086(5) 0.008(3) 0.020(3) -0.008(2)
C10 0.087(4) 0.064(3) 0.055(4) -0.004(3) 0.041(3) -0.036(3)
C11 0.045(3) 0.047(3) 0.053(3) 0.003(2) -0.004(2) -0.005(2)
C15 0.024(2) 0.020(2) 0.040(3) -0.0011(17) 0.016(2) 0.0004(16)
C16 0.025(2) 0.022(2) 0.046(3) -0.0014(17) 0.018(2) -0.0008(16)
C17 0.032(2) 0.025(2) 0.026(3) -0.0002(16) 0.015(2) 0.0011(17)
C18 0.023(2) 0.020(2) 0.040(3) -0.0044(16) 0.013(2) 0.0017(16)
C19 0.021(2) 0.024(2) 0.042(3) -0.0040(17) 0.016(2) 0.0032(16)
C20 0.027(2) 0.024(2) 0.030(3) -0.0028(16) 0.013(2) 0.0008(16)
C21 0.023(2) 0.027(2) 0.039(3) 0.0010(17) 0.013(2) -0.0005(16)
C22 0.024(2) 0.029(2) 0.037(3) 0.0001(18) 0.012(2) 0.0007(17)
C23 0.018(2) 0.045(3) 0.040(3) 0.004(2) 0.006(2) -0.0011(18)
C24 0.024(2) 0.031(2) 0.039(3) 0.0033(18) 0.005(2) -0.0009(18)
C25 0.026(2) 0.037(3) 0.041(3) 0.003(2) 0.012(2) 0.0040(18)
C26 0.029(2) 0.029(2) 0.037(3) -0.0003(17) 0.009(2) 0.0058(18)
C27 0.023(2) 0.019(2) 0.034(3) -0.0014(16) 0.0080(19) 0.0004(16)
C28 0.019(2) 0.021(2) 0.035(3) -0.0037(16) 0.0133(19) 0.0007(15)
C29 0.025(2) 0.023(2) 0.026(3) -0.0011(16) 0.0104(19) 0.0000(16)
C30 0.022(2) 0.020(2) 0.033(3) -0.0017(16) 0.0074(19) -0.0008(15)
C31 0.022(2) 0.028(2) 0.036(3) -0.0018(17) 0.010(2) -0.0007(16)
C32 0.026(2) 0.032(2) 0.030(3) 0.0013(17) 0.013(2) -0.0001(17)
C33 0.023(2) 0.028(2) 0.033(3) 0.0000(17) 0.0075(19) 0.0011(16)
C34 0.024(2) 0.027(2) 0.032(3) -0.0020(17) 0.006(2) -0.0004(16)
C35 0.023(2) 0.044(3) 0.044(3) 0.006(2) 0.005(2) 0.0065(19)
C36 0.027(2) 0.022(2) 0.039(3) -0.0011(17) 0.004(2) 0.0016(17)
C37 0.022(2) 0.037(3) 0.038(3) -0.007(2) 0.003(2) 0.0038(17)
C38 0.026(2) 0.033(2) 0.033(3) 0.0008(18) 0.003(2) 0.0026(18)
N1 0.034(2) 0.087(3) 0.048(3) 0.013(2) 0.010(2) 0.002(2)
N2 0.026(2) 0.050(2) 0.055(3) 0.0035(18) 0.012(2) 0.0014(17)
N3 0.044(3) 0.069(3) 0.048(3) 0.010(2) 0.013(2) 0.008(2)
N4 0.032(2) 0.040(2) 0.069(3) 0.0014(18) 0.016(2) 0.0067(17)
N5 0.038(2) 0.081(3) 0.050(3) 0.015(2) 0.011(2) 0.012(2)
N6 0.024(2) 0.037(2) 0.053(3) -0.0039(16) 0.0091(19) 0.0006(16)
N7 0.040(3) 0.069(3) 0.045(3) -0.005(2) 0.006(2) 0.000(2)
N8 0.027(2) 0.054(2) 0.061(3) 0.0065(19) 0.014(2) 0.0047(17)
F1 0.0315(14) 0.0517(15) 0.0367(16) 0.0016(11) 0.0180(12) 0.0019(11)
F2 0.0309(14) 0.0595(16) 0.0352(16) 0.0001(11) 0.0169(12) 0.0046(11)
F3 0.0262(13) 0.0400(14) 0.0314(15) -0.0008(10) 0.0113(11) 0.0023(10)
F4 0.0294(14) 0.0709(17) 0.0350(16) 0.0097(12) 0.0138(12) 0.0052(12)
Fe1 0.0255(3) 0.0366(4) 0.0349(4) 0.0021(2) 0.0094(3) 0.0002(2)
 
_geom_special_details
;
 All s.u.'s (except the s.u. in the dihedral angle between two l.s. planes)
 are estimated using the full covariance matrix.  The cell s.u.'s are taken
 into account individually in the estimation of s.u.'s in distances, angles
 and torsion angles; correlations between s.u.'s in cell parameters are only
 used when they are defined by crystal symmetry.  An approximate (isotropic)
 treatment of cell s.u.'s is used for estimating s.u.'s involving l.s. planes.
;
 
loop_
 _geom_bond_atom_site_label_1
 _geom_bond_atom_site_label_2
 _geom_bond_distance
 _geom_bond_site_symmetry_2
 _geom_bond_publ_flag
C12A C11 1.538(6) . ?
C12A H12A 0.9800 . ?
C12A H12B 0.9800 . ?
C12A H12C 0.9800 . ?
C13A C11 1.528(6) . ?
C13A H13A 0.9800 . ?
C13A H13B 0.9800 . ?
C13A H13C 0.9800 . ?
C14A C11 1.549(8) . ?
C14A H14A 0.9800 . ?
C14A H14B 0.9800 . ?
C14A H14C 0.9800 . ?
C12B C11 1.535(8) . ?
C12B H12D 0.9800 . ?
C12B H12E 0.9800 . ?
C12B H12F 0.9800 . ?
C13B C11 1.544(8) . ?
C13B H13D 0.9800 . ?
C13B H13E 0.9800 . ?
C13B H13F 0.9800 . ?
C14B C11 1.555(8) . ?
C14B H14D 0.9800 . ?
C14B H14E 0.9800 . ?
C14B H14F 0.9800 . ?
C14C C11 1.552(8) . ?
C14C H14G 0.9800 . ?
C14C H14H 0.9800 . ?
C14C H14I 0.9800 . ?
C1 C5 1.413(6) . ?
C1 C2 1.413(6) . ?
C1 C11 1.527(6) . ?
C2 C3 1.416(5) . ?
C2 H2 0.9500 . ?
C3 C4 1.412(6) . ?
C3 H3 0.9500 . ?
C4 C5 1.397(6) . ?
C4 H4 0.9500 . ?
C5 H5 0.9500 . ?
C6 C7 1.364(7) . ?
C6 C10 1.426(8) . ?
C6 H6 0.9500 . ?
C7 C8 1.364(7) . ?
C7 H7 0.9500 . ?
C8 C9 1.367(7) . ?
C8 H8 0.9500 . ?
C9 C10 1.400(7) . ?
C9 H9 0.9500 . ?
C10 H10 0.9500 . ?
C15 C21 1.406(5) . ?
C15 C16 1.421(5) . ?
C15 C20 1.430(5) . ?
C16 C17 1.347(5) . ?
C16 H16 0.9500 . ?
C17 F1 1.331(4) . ?
C17 C18 1.442(5) . ?
C18 C22 1.395(5) . ?
C18 C19 1.424(5) . ?
C19 C20 1.344(5) . ?
C19 H19 0.9500 . ?
C20 F2 1.344(4) . ?
C21 C23 1.409(6) . ?
C21 C24 1.433(6) . ?
C22 C25 1.410(6) . ?
C22 C26 1.433(6) . ?
C23 N1 1.142(5) . ?
C24 N2 1.140(5) . ?
C25 N3 1.146(5) . ?
C26 N4 1.149(5) . ?
C27 C33 1.401(5) . ?
C27 C28 1.421(5) . ?
C27 C32 1.436(5) . ?
C28 C29 1.344(5) . ?
C28 H28 0.9500 . ?
C29 F3 1.343(4) . ?
C29 C30 1.433(5) . ?
C30 C34 1.387(5) . ?
C30 C31 1.423(5) . ?
C31 C32 1.338(5) . ?
C31 H31 0.9500 . ?
C32 F4 1.342(4) . ?
C33 C35 1.413(6) . ?
C33 C36 1.431(6) . ?
C34 C37 1.408(6) . ?
C34 C38 1.440(6) . ?
C35 N5 1.147(5) . ?
C36 N6 1.143(5) . ?
C37 N7 1.142(5) . ?
C38 N8 1.152(5) . ?
 
loop_
 _geom_angle_atom_site_label_1
 _geom_angle_atom_site_label_2
 _geom_angle_atom_site_label_3
 _geom_angle
 _geom_angle_site_symmetry_1
 _geom_angle_site_symmetry_3
 _geom_angle_publ_flag
C11 C12A H12A 109.5 . . ?
C11 C12A H12B 109.5 . . ?
H12A C12A H12B 109.5 . . ?
C11 C12A H12C 109.5 . . ?
H12A C12A H12C 109.5 . . ?
H12B C12A H12C 109.5 . . ?
C11 C13A H13A 109.5 . . ?
C11 C13A H13B 109.5 . . ?
H13A C13A H13B 109.5 . . ?
C11 C13A H13C 109.5 . . ?
H13A C13A H13C 109.5 . . ?
H13B C13A H13C 109.5 . . ?
C11 C14A H14A 109.5 . . ?
C11 C14A H14B 109.5 . . ?
H14A C14A H14B 109.5 . . ?
C11 C14A H14C 109.5 . . ?
H14A C14A H14C 109.5 . . ?
H14B C14A H14C 109.5 . . ?
C11 C12B H12D 109.5 . . ?
C11 C12B H12E 109.5 . . ?
H12D C12B H12E 109.5 . . ?
C11 C12B H12F 109.5 . . ?
H12D C12B H12F 109.5 . . ?
H12E C12B H12F 109.5 . . ?
C11 C13B H13D 109.5 . . ?
C11 C13B H13E 109.5 . . ?
H13D C13B H13E 109.5 . . ?
C11 C13B H13F 109.5 . . ?
H13D C13B H13F 109.5 . . ?
H13E C13B H13F 109.5 . . ?
C11 C14B H14D 109.5 . . ?
C11 C14B H14E 109.5 . . ?
H14D C14B H14E 109.5 . . ?
C11 C14B H14F 109.5 . . ?
H14D C14B H14F 109.5 . . ?
H14E C14B H14F 109.5 . . ?
C11 C14C H14G 109.5 . . ?
C11 C14C H14H 109.5 . . ?
H14G C14C H14H 109.5 . . ?
C11 C14C H14I 109.5 . . ?
H14G C14C H14I 109.5 . . ?
H14H C14C H14I 109.5 . . ?
C5 C1 C2 106.6(4) . . ?
C5 C1 C11 127.9(5) . . ?
C2 C1 C11 125.3(4) . . ?
C1 C2 C3 109.2(4) . . ?
C1 C2 H2 125.4 . . ?
C3 C2 H2 125.4 . . ?
C4 C3 C2 106.8(4) . . ?
C4 C3 H3 126.6 . . ?
C2 C3 H3 126.6 . . ?
C5 C4 C3 108.6(4) . . ?
C5 C4 H4 125.7 . . ?
C3 C4 H4 125.7 . . ?
C4 C5 C1 108.9(5) . . ?
C4 C5 H5 125.5 . . ?
C1 C5 H5 125.5 . . ?
C7 C6 C10 107.7(5) . . ?
C7 C6 H6 126.1 . . ?
C10 C6 H6 126.1 . . ?
C6 C7 C8 109.2(6) . . ?
C6 C7 H7 125.4 . . ?
C8 C7 H7 125.4 . . ?
C7 C8 C9 108.8(5) . . ?
C7 C8 H8 125.6 . . ?
C9 C8 H8 125.6 . . ?
C8 C9 C10 108.6(5) . . ?
C8 C9 H9 125.7 . . ?
C10 C9 H9 125.7 . . ?
C9 C10 C6 105.7(5) . . ?
C9 C10 H10 127.2 . . ?
C6 C10 H10 127.2 . . ?
C1 C11 C13A 110.0(6) . . ?
C1 C11 C12B 112.9(13) . . ?
C13A C11 C12B 123.1(14) . . ?
C1 C11 C12A 108.5(5) . . ?
C13A C11 C12A 107.8(6) . . ?
C12B C11 C12A 22.7(13) . . ?
C1 C11 C13B 112.5(18) . . ?
C13A C11 C13B 17.5(17) . . ?
C12B C11 C13B 108.4(19) . . ?
C12A C11 C13B 91.0(16) . . ?
C1 C11 C14A 106.8(10) . . ?
C13A C11 C14A 110(3) . . ?
C12B C11 C14A 91(3) . . ?
C12A C11 C14A 114(3) . . ?
C13B C11 C14A 123(3) . . ?
C1 C11 C14C 106.1(10) . . ?
C13A C11 C14C 132(2) . . ?
C12B C11 C14C 66(3) . . ?
C12A C11 C14C 89(2) . . ?
C13B C11 C14C 139(2) . . ?
C14A C11 C14C 27.2(18) . . ?
C1 C11 C14B 105.8(8) . . ?
C13A C11 C14B 90.5(17) . . ?
C12B C11 C14B 111(2) . . ?
C12A C11 C14B 132.0(15) . . ?
C13B C11 C14B 106(2) . . ?
C14A C11 C14B 22(2) . . ?
C14C C11 C14B 49.2(18) . . ?
C21 C15 C16 121.8(4) . . ?
C21 C15 C20 122.8(4) . . ?
C16 C15 C20 115.4(4) . . ?
C17 C16 C15 121.0(4) . . ?
C17 C16 H16 119.5 . . ?
C15 C16 H16 119.5 . . ?
F1 C17 C16 119.6(4) . . ?
F1 C17 C18 117.1(3) . . ?
C16 C17 C18 123.4(4) . . ?
C22 C18 C19 121.6(4) . . ?
C22 C18 C17 123.1(4) . . ?
C19 C18 C17 115.4(3) . . ?
C20 C19 C18 120.7(4) . . ?
C20 C19 H19 119.7 . . ?
C18 C19 H19 119.7 . . ?
F2 C20 C19 118.6(4) . . ?
F2 C20 C15 117.2(3) . . ?
C19 C20 C15 124.1(4) . . ?
C15 C21 C23 125.6(4) . . ?
C15 C21 C24 119.5(4) . . ?
C23 C21 C24 114.9(4) . . ?
C18 C22 C25 126.5(4) . . ?
C18 C22 C26 119.3(4) . . ?
C25 C22 C26 114.2(4) . . ?
N1 C23 C21 174.7(5) . . ?
N2 C24 C21 178.2(5) . . ?
N3 C25 C22 175.8(5) . . ?
N4 C26 C22 179.6(5) . . ?
C33 C27 C28 121.5(4) . . ?
C33 C27 C32 123.3(4) . . ?
C28 C27 C32 115.2(3) . . ?
C29 C28 C27 120.9(4) . . ?
C29 C28 H28 119.6 . . ?
C27 C28 H28 119.6 . . ?
F3 C29 C28 118.8(4) . . ?
F3 C29 C30 117.1(3) . . ?
C28 C29 C30 124.0(4) . . ?
C34 C30 C31 121.8(4) . . ?
C34 C30 C29 123.4(4) . . ?
C31 C30 C29 114.8(3) . . ?
C32 C31 C30 121.4(4) . . ?
C32 C31 H31 119.3 . . ?
C30 C31 H31 119.3 . . ?
C31 C32 F4 119.5(4) . . ?
C31 C32 C27 123.7(4) . . ?
F4 C32 C27 116.8(3) . . ?
C27 C33 C35 125.3(4) . . ?
C27 C33 C36 119.5(4) . . ?
C35 C33 C36 115.1(3) . . ?
C30 C34 C37 125.6(4) . . ?
C30 C34 C38 119.4(4) . . ?
C37 C34 C38 114.9(3) . . ?
N5 C35 C33 176.5(5) . . ?
N6 C36 C33 179.1(5) . . ?
N7 C37 C34 176.5(5) . . ?
N8 C38 C34 178.9(5) . . ?
 
_diffrn_measured_fraction_theta_max    0.990
_diffrn_reflns_theta_full              26.02
_diffrn_measured_fraction_theta_full   0.990
_refine_diff_density_max    0.694
_refine_diff_density_min   -0.560
_refine_diff_density_rms    0.071
 
data_6-tPeF2
 
_audit_creation_method            SHELXL-97
_chemical_name_systematic
;
 ?
;
_chemical_name_common             ?
_chemical_melting_point           ?
_chemical_formula_moiety          ?
_chemical_formula_sum
 'C39 H24 F4 Fe N8'
_chemical_formula_weight          736.51
 
loop_
 _atom_type_symbol
 _atom_type_description
 _atom_type_scat_dispersion_real
 _atom_type_scat_dispersion_imag
 _atom_type_scat_source
 'C'  'C'   0.0033   0.0016
 'International Tables Vol C Tables 4.2.6.8 and 6.1.1.4'
 'H'  'H'   0.0000   0.0000
 'International Tables Vol C Tables 4.2.6.8 and 6.1.1.4'
 'N'  'N'   0.0061   0.0033
 'International Tables Vol C Tables 4.2.6.8 and 6.1.1.4'
 'F'  'F'   0.0171   0.0103
 'International Tables Vol C Tables 4.2.6.8 and 6.1.1.4'
 'Fe'  'Fe'   0.3463   0.8444
 'International Tables Vol C Tables 4.2.6.8 and 6.1.1.4'
 
_symmetry_cell_setting           'Triclinic'
_symmetry_space_group_name_H-M   'P-1   '
loop_
 _symmetry_equiv_pos_as_xyz
 'x, y, z'
 '-x, -y, -z'
 
_cell_length_a                    8.8034(10)
_cell_length_b                    12.8426(15)
_cell_length_c                    15.2449(17)
_cell_angle_alpha                 89.342(2)
_cell_angle_beta                  76.634(2)
_cell_angle_gamma                 89.102(2)
_cell_volume                      1676.6(3)
_cell_formula_units_Z             2
_cell_measurement_temperature     173
_cell_measurement_reflns_used     2309
_cell_measurement_theta_min       2.46
_cell_measurement_theta_max       27.88
_exptl_crystal_description        'plate'
_exptl_crystal_colour             'black'
_exptl_crystal_size_max           0.30
_exptl_crystal_size_mid           0.20
_exptl_crystal_size_min           0.05
_exptl_crystal_density_meas       ?
_exptl_crystal_density_diffrn     1.459
_exptl_crystal_density_method     'not measured'
_exptl_crystal_F_000              752
_exptl_absorpt_coefficient_mu     0.515
_exptl_absorpt_correction_type    empirical
_exptl_absorpt_correction_T_min   0.8609
_exptl_absorpt_correction_T_max   0.9747
_exptl_absorpt_process_details    
;
SADABS Sheldrick 1996
;
_exptl_special_details
;
 ?
;
 
_diffrn_ambient_temperature       173
_diffrn_radiation_wavelength      0.71073
_diffrn_radiation_type            MoK\a
_diffrn_radiation_source          'Bruker TXS fine-focus rotating anode' 
_diffrn_radiation_monochromator   'Bruker Helios multilayer confocal mirror' 
_diffrn_measurement_device_type   'Bruker APEXII CCD area detector' 
_diffrn_measurement_method        'phi and omega scans' 
_diffrn_detector_area_resol_mean  8.333
_diffrn_standards_number          ?
_diffrn_standards_interval_count  ?
_diffrn_standards_interval_time   ?
_diffrn_standards_decay_%         ?
_diffrn_reflns_number             12365
_diffrn_reflns_av_R_equivalents   0.0416
_diffrn_reflns_av_sigmaI/netI     0.1162
_diffrn_reflns_limit_h_min        -9
_diffrn_reflns_limit_h_max        11
_diffrn_reflns_limit_k_min        -17
_diffrn_reflns_limit_k_max        16
_diffrn_reflns_limit_l_min        -20
_diffrn_reflns_limit_l_max        19
_diffrn_reflns_theta_min          1.59
_diffrn_reflns_theta_max          28.36
_reflns_number_total              8252
_reflns_number_gt                 4232
_reflns_threshold_expression      >2\s(I)
 
_computing_data_collection        'APEX2 (Bruker AXS, 2006)'
_computing_cell_refinement        'APEX2 (Bruker AXS, 2006)'
_computing_data_reduction         'SAINT (Bruker AXS, 2004)'
_computing_structure_solution     'SHELXS-97 (Sheldrick, 1997)'
_computing_structure_refinement   'SHELXL-97 (Sheldrick, 1997)'
_computing_molecular_graphics     'XSHEL (Bruker AXS,2002)'
_computing_publication_material   'XCIF (Bruker AXS, 2001)' 
_refine_special_details
;
 Refinement of F^2^ against ALL reflections.  The weighted R-factor wR and
 goodness of fit S are based on F^2^, conventional R-factors R are based
 on F, with F set to zero for negative F^2^. The threshold expression of
 F^2^ > 2\s(F^2^) is used only for calculating R-factors(gt) etc. and is
 not relevant to the choice of reflections for refinement.  R-factors based
 on F^2^ are statistically about twice as large as those based on F, and R-
 factors based on ALL data will be even larger.
;
 
_refine_ls_structure_factor_coef  Fsqd
_refine_ls_matrix_type            full
_refine_ls_weighting_scheme       calc
_refine_ls_weighting_details
 'calc w=1/[\s^2^(Fo^2^)+(0.0594P)^2^+0.0000P] where P=(Fo^2^+2Fc^2^)/3'
_atom_sites_solution_primary      direct
_atom_sites_solution_secondary    difmap
_atom_sites_solution_hydrogens    geom
_refine_ls_hydrogen_treatment     constr

_refine_ls_extinction_method      none
_refine_ls_extinction_coef        ?
_refine_ls_number_reflns          8252
_refine_ls_number_parameters      472
_refine_ls_number_restraints      0
_refine_ls_R_factor_all           0.1429
_refine_ls_R_factor_gt            0.0574
_refine_ls_wR_factor_ref          0.1438
_refine_ls_wR_factor_gt           0.1121
_refine_ls_goodness_of_fit_ref    0.948
_refine_ls_restrained_S_all       0.948
_refine_ls_shift/su_max           0.001
_refine_ls_shift/su_mean          0.000
 
loop_
 _atom_site_label
 _atom_site_type_symbol
 _atom_site_fract_x
 _atom_site_fract_y
 _atom_site_fract_z
 _atom_site_U_iso_or_equiv
 _atom_site_adp_type
 _atom_site_occupancy
 _atom_site_symmetry_multiplicity
 _atom_site_calc_flag
 _atom_site_refinement_flags
 _atom_site_disorder_assembly
 _atom_site_disorder_group
C1 C 0.8580(4) 0.3164(3) 0.4931(2) 0.0303(8) Uani 1 1 d . . .
C2 C 0.8546(4) 0.3057(3) 0.5863(2) 0.0360(9) Uani 1 1 d . . .
H2 H 0.9373 0.2784 0.6105 0.043 Uiso 1 1 calc R . .
C3 C 0.7088(4) 0.3421(3) 0.6375(2) 0.0384(10) Uani 1 1 d . . .
H3 H 0.6763 0.3430 0.7014 0.046 Uiso 1 1 calc R . .
C4 C 0.6211(4) 0.3766(3) 0.5764(2) 0.0415(10) Uani 1 1 d . . .
H4 H 0.5186 0.4058 0.5920 0.050 Uiso 1 1 calc R . .
C5 C 0.7110(4) 0.3608(3) 0.4880(2) 0.0362(9) Uani 1 1 d . . .
H5 H 0.6788 0.3770 0.4341 0.043 Uiso 1 1 calc R . .
C6 C 0.6972(5) 0.0681(3) 0.5092(3) 0.0453(11) Uani 1 1 d . . .
H6 H 0.7842 0.0416 0.4658 0.054 Uiso 1 1 calc R . .
C7 C 0.6799(5) 0.0649(3) 0.6014(3) 0.0423(10) Uani 1 1 d . . .
H7 H 0.7533 0.0362 0.6322 0.051 Uiso 1 1 calc R . .
C8 C 0.5372(5) 0.1104(3) 0.6416(3) 0.0448(11) Uani 1 1 d . . .
H8 H 0.4968 0.1183 0.7046 0.054 Uiso 1 1 calc R . .
C9 C 0.4640(4) 0.1420(3) 0.5752(3) 0.0486(11) Uani 1 1 d . . .
H9 H 0.3639 0.1746 0.5844 0.058 Uiso 1 1 calc R . .
C10 C 0.5642(5) 0.1175(3) 0.4903(3) 0.0508(12) Uani 1 1 d . . .
H10 H 0.5452 0.1315 0.4324 0.061 Uiso 1 1 calc R . .
C11 C 0.9936(4) 0.2921(3) 0.4144(2) 0.0371(9) Uani 1 1 d . . .
C12 C 1.1060(5) 0.2147(4) 0.4430(3) 0.0597(13) Uani 1 1 d . . .
H12A H 1.1465 0.2444 0.4919 0.090 Uiso 1 1 calc R . .
H12B H 1.1929 0.1996 0.3915 0.090 Uiso 1 1 calc R . .
H12C H 1.0509 0.1501 0.4641 0.090 Uiso 1 1 calc R . .
C13 C 0.9352(5) 0.2469(3) 0.3359(2) 0.0466(11) Uani 1 1 d . . .
H13A H 0.8778 0.1828 0.3558 0.070 Uiso 1 1 calc R . .
H13B H 1.0245 0.2311 0.2860 0.070 Uiso 1 1 calc R . .
H13C H 0.8661 0.2977 0.3157 0.070 Uiso 1 1 calc R . .
C14 C 1.0710(5) 0.3978(4) 0.3861(3) 0.0674(15) Uani 1 1 d . . .
H14A H 0.9912 0.4465 0.3725 0.081 Uiso 1 1 calc R . .
H14B H 1.1066 0.4262 0.4379 0.081 Uiso 1 1 calc R . .
C15 C 1.2093(6) 0.3943(4) 0.3049(3) 0.0848(19) Uani 1 1 d . . .
H15A H 1.1804 0.3564 0.2558 0.127 Uiso 1 1 calc R . .
H15B H 1.2979 0.3589 0.3217 0.127 Uiso 1 1 calc R . .
H15C H 1.2386 0.4655 0.2848 0.127 Uiso 1 1 calc R . .
C16 C 1.0503(3) 0.3532(2) 0.9032(2) 0.0231(7) Uani 1 1 d . . .
C17 C 1.0634(3) 0.3637(2) 0.9943(2) 0.0231(7) Uani 1 1 d . . .
H17 H 1.1631 0.3594 1.0081 0.028 Uiso 1 1 calc R . .
C18 C 0.9350(4) 0.3796(3) 1.0607(2) 0.0230(7) Uani 1 1 d . . .
C19 C 0.7792(3) 0.3858(2) 1.0471(2) 0.0221(7) Uani 1 1 d . . .
C20 C 0.7667(4) 0.3726(2) 0.9563(2) 0.0239(7) Uani 1 1 d . . .
H20 H 0.6668 0.3744 0.9424 0.029 Uiso 1 1 calc R . .
C21 C 0.8946(4) 0.3576(3) 0.8905(2) 0.0234(7) Uani 1 1 d . . .
C22 C 1.1813(3) 0.3395(3) 0.8329(2) 0.0254(7) Uani 1 1 d . . .
C23 C 0.6464(4) 0.4026(3) 1.1157(2) 0.0242(7) Uani 1 1 d . . .
C24 C 1.1806(4) 0.3333(3) 0.7392(2) 0.0324(9) Uani 1 1 d . . .
C25 C 1.3342(4) 0.3341(3) 0.8500(2) 0.0280(8) Uani 1 1 d . . .
C26 C 0.6458(4) 0.4194(3) 1.2086(2) 0.0293(8) Uani 1 1 d . . .
C27 C 0.4969(4) 0.4069(3) 1.0955(2) 0.0250(7) Uani 1 1 d . . .
N1 N 1.1898(4) 0.3272(3) 0.6638(2) 0.0478(9) Uani 1 1 d . . .
N2 N 1.4587(3) 0.3299(2) 0.8614(2) 0.0384(8) Uani 1 1 d . . .
N3 N 0.6348(4) 0.4361(3) 1.2835(2) 0.0421(8) Uani 1 1 d . . .
N4 N 0.3779(3) 0.4096(2) 1.07729(19) 0.0357(7) Uani 1 1 d . . .
F1 F 0.9510(2) 0.39220(16) 1.14551(12) 0.0332(5) Uani 1 1 d . . .
F2 F 0.8777(2) 0.34537(16) 0.80535(12) 0.0354(5) Uani 1 1 d . . .
Fe1 Fe 0.67135(6) 0.22023(4) 0.55860(3) 0.02838(15) Uani 1 1 d . . .
C28 C 0.9109(3) 0.1067(2) 0.8980(2) 0.0222(7) Uani 1 1 d . . .
C29 C 0.9258(3) 0.1221(2) 0.9880(2) 0.0221(7) Uani 1 1 d . . .
H29 H 1.0265 0.1212 1.0007 0.027 Uiso 1 1 calc R . .
C30 C 0.7987(4) 0.1380(2) 1.05518(19) 0.0215(7) Uani 1 1 d . . .
C31 C 0.6420(3) 0.1389(2) 1.0437(2) 0.0224(7) Uani 1 1 d . . .
C32 C 0.6274(4) 0.1252(3) 0.9532(2) 0.0247(7) Uani 1 1 d . . .
H32 H 0.5269 0.1270 0.9403 0.030 Uiso 1 1 calc R . .
C33 C 0.7535(4) 0.1098(3) 0.8865(2) 0.0259(8) Uani 1 1 d . . .
C34 C 1.0411(4) 0.0891(3) 0.8283(2) 0.0241(7) Uani 1 1 d . . .
C35 C 0.5117(4) 0.1512(3) 1.1142(2) 0.0252(7) Uani 1 1 d . . .
C36 C 1.0383(4) 0.0717(3) 0.7364(2) 0.0314(8) Uani 1 1 d . . .
C37 C 1.1929(4) 0.0855(3) 0.8456(2) 0.0253(7) Uani 1 1 d . . .
C38 C 0.5138(4) 0.1577(3) 1.2075(2) 0.0300(8) Uani 1 1 d . . .
C39 C 0.3584(4) 0.1516(3) 1.0974(2) 0.0286(8) Uani 1 1 d . . .
N5 N 1.0449(4) 0.0584(3) 0.6614(2) 0.0487(9) Uani 1 1 d . . .
N6 N 1.3152(3) 0.0823(2) 0.85973(19) 0.0336(7) Uani 1 1 d . . .
N7 N 0.5056(4) 0.1622(3) 1.2829(2) 0.0491(9) Uani 1 1 d . . .
N8 N 0.2353(3) 0.1512(3) 1.0837(2) 0.0456(9) Uani 1 1 d . . .
F3 F 0.8181(2) 0.15435(15) 1.13874(11) 0.0289(5) Uani 1 1 d . . .
F4 F 0.7351(2) 0.09591(18) 0.80252(12) 0.0416(6) Uani 1 1 d . . .
 
loop_
 _atom_site_aniso_label
 _atom_site_aniso_U_11
 _atom_site_aniso_U_22
 _atom_site_aniso_U_33
 _atom_site_aniso_U_23
 _atom_site_aniso_U_13
 _atom_site_aniso_U_12
C1 0.0273(18) 0.033(2) 0.0296(18) -0.0008(16) -0.0040(15) 0.0000(16)
C2 0.0268(19) 0.046(3) 0.037(2) -0.0048(18) -0.0110(17) -0.0086(17)
C3 0.037(2) 0.045(3) 0.032(2) -0.0089(18) -0.0042(17) -0.0088(18)
C4 0.035(2) 0.042(3) 0.044(2) -0.0081(19) -0.0010(19) 0.0029(18)
C5 0.033(2) 0.038(2) 0.038(2) 0.0038(17) -0.0083(17) 0.0026(17)
C6 0.038(2) 0.040(3) 0.049(2) -0.013(2) 0.008(2) -0.0108(19)
C7 0.042(2) 0.040(3) 0.050(2) 0.0053(19) -0.021(2) -0.0020(19)
C8 0.040(2) 0.053(3) 0.036(2) 0.0021(19) 0.0023(19) -0.013(2)
C9 0.026(2) 0.048(3) 0.072(3) -0.004(2) -0.013(2) -0.0059(19)
C10 0.076(3) 0.047(3) 0.040(2) 0.006(2) -0.032(2) -0.028(2)
C11 0.031(2) 0.034(2) 0.042(2) 0.0014(17) 0.0012(17) -0.0010(17)
C12 0.041(2) 0.082(4) 0.052(3) -0.002(2) -0.003(2) 0.019(2)
C13 0.044(2) 0.061(3) 0.030(2) -0.0040(19) 0.0018(18) 0.003(2)
C14 0.054(3) 0.054(3) 0.076(3) -0.013(3) 0.024(3) -0.014(2)
C15 0.068(3) 0.071(4) 0.091(4) -0.009(3) 0.033(3) -0.027(3)
C16 0.0168(16) 0.0200(18) 0.0339(18) 0.0010(14) -0.0090(14) 0.0037(13)
C17 0.0143(15) 0.0271(19) 0.0303(17) 0.0010(14) -0.0102(14) 0.0012(13)
C18 0.0194(16) 0.0243(19) 0.0295(17) 0.0011(14) -0.0138(14) -0.0024(13)
C19 0.0191(16) 0.0212(18) 0.0279(17) 0.0007(14) -0.0098(14) 0.0001(13)
C20 0.0177(16) 0.026(2) 0.0309(18) -0.0010(15) -0.0124(14) 0.0024(13)
C21 0.0203(16) 0.026(2) 0.0280(17) -0.0003(14) -0.0136(14) 0.0019(14)
C22 0.0153(16) 0.027(2) 0.0358(18) -0.0003(15) -0.0101(14) 0.0029(14)
C23 0.0192(16) 0.0264(19) 0.0287(17) -0.0015(14) -0.0088(14) 0.0005(14)
C24 0.0146(16) 0.046(2) 0.036(2) -0.0079(17) -0.0052(15) 0.0018(15)
C25 0.0220(18) 0.030(2) 0.0316(18) 0.0011(15) -0.0055(15) -0.0023(15)
C26 0.0183(17) 0.032(2) 0.039(2) 0.0002(17) -0.0095(16) 0.0041(14)
C27 0.0179(17) 0.027(2) 0.0286(18) -0.0027(15) -0.0031(14) 0.0017(14)
N1 0.0273(17) 0.077(3) 0.0395(19) -0.0094(18) -0.0074(15) -0.0010(17)
N2 0.0199(16) 0.050(2) 0.0453(18) -0.0029(16) -0.0070(14) 0.0008(14)
N3 0.0343(18) 0.055(2) 0.0382(18) -0.0020(16) -0.0103(15) 0.0032(16)
N4 0.0228(16) 0.041(2) 0.0439(18) -0.0007(15) -0.0084(14) 0.0018(14)
F1 0.0237(10) 0.0508(14) 0.0287(10) -0.0014(9) -0.0137(9) -0.0004(9)
F2 0.0220(10) 0.0585(15) 0.0282(10) -0.0017(10) -0.0114(8) 0.0037(9)
Fe1 0.0203(2) 0.0386(3) 0.0268(3) -0.0019(2) -0.0066(2) -0.0013(2)
C28 0.0192(16) 0.0216(19) 0.0270(17) 0.0003(14) -0.0081(14) -0.0007(13)
C29 0.0142(15) 0.0232(18) 0.0311(17) 0.0022(14) -0.0098(14) -0.0003(13)
C30 0.0208(16) 0.0249(19) 0.0209(16) -0.0004(13) -0.0090(13) 0.0001(13)
C31 0.0176(16) 0.0214(18) 0.0292(17) 0.0013(14) -0.0078(14) 0.0004(13)
C32 0.0166(16) 0.028(2) 0.0322(18) -0.0008(15) -0.0105(14) 0.0018(14)
C33 0.0223(17) 0.034(2) 0.0251(17) -0.0031(15) -0.0126(14) 0.0025(15)
C34 0.0202(16) 0.0252(19) 0.0283(17) 0.0017(14) -0.0087(14) 0.0005(14)
C35 0.0189(16) 0.0255(19) 0.0321(18) 0.0022(15) -0.0079(14) 0.0001(14)
C36 0.0190(17) 0.039(2) 0.034(2) -0.0032(17) -0.0024(16) 0.0075(15)
C37 0.0217(17) 0.026(2) 0.0270(17) 0.0003(15) -0.0027(14) 0.0039(14)
C38 0.0211(17) 0.035(2) 0.033(2) 0.0034(16) -0.0049(15) 0.0036(15)
C39 0.0209(18) 0.032(2) 0.0318(19) -0.0011(15) -0.0039(15) 0.0008(15)
N5 0.0339(19) 0.076(3) 0.0365(19) -0.0100(18) -0.0079(15) 0.0096(17)
N6 0.0217(15) 0.0343(19) 0.0439(18) 0.0040(14) -0.0061(14) 0.0014(13)
N7 0.0385(19) 0.075(3) 0.0317(18) 0.0041(17) -0.0049(16) 0.0056(18)
N8 0.0239(17) 0.058(2) 0.056(2) -0.0028(17) -0.0096(16) -0.0012(15)
F3 0.0226(10) 0.0415(13) 0.0250(10) -0.0021(9) -0.0106(8) -0.0002(9)
F4 0.0263(11) 0.0731(17) 0.0284(11) -0.0100(10) -0.0122(9) 0.0033(10)
 
_geom_special_details
;
 All s.u.'s (except the s.u. in the dihedral angle between two l.s. planes)
 are estimated using the full covariance matrix.  The cell s.u.'s are taken
 into account individually in the estimation of s.u.'s in distances, angles
 and torsion angles; correlations between s.u.'s in cell parameters are only
 used when they are defined by crystal symmetry.  An approximate (isotropic)
 treatment of cell s.u.'s is used for estimating s.u.'s involving l.s. planes.
;
 
loop_
 _geom_bond_atom_site_label_1
 _geom_bond_atom_site_label_2
 _geom_bond_distance
 _geom_bond_site_symmetry_2
 _geom_bond_publ_flag
C1 C2 1.419(5) . ?
C1 C5 1.424(5) . ?
C1 C11 1.515(4) . ?
C2 C3 1.414(5) . ?
C2 H2 0.9500 . ?
C3 C4 1.404(5) . ?
C3 H3 0.9500 . ?
C4 C5 1.411(5) . ?
C4 H4 0.9500 . ?
C5 H5 0.9500 . ?
C6 C7 1.378(5) . ?
C6 C10 1.409(6) . ?
C6 H6 0.9500 . ?
C7 C8 1.387(5) . ?
C7 H7 0.9500 . ?
C8 C9 1.374(5) . ?
C8 H8 0.9500 . ?
C9 C10 1.424(5) . ?
C9 H9 0.9500 . ?
C10 H10 0.9500 . ?
C11 C12 1.523(5) . ?
C11 C13 1.531(5) . ?
C11 C14 1.539(5) . ?
C12 H12A 0.9800 . ?
C12 H12B 0.9800 . ?
C12 H12C 0.9800 . ?
C13 H13A 0.9800 . ?
C13 H13B 0.9800 . ?
C13 H13C 0.9800 . ?
C14 C15 1.524(5) . ?
C14 H14A 0.9900 . ?
C14 H14B 0.9900 . ?
C15 H15A 0.9800 . ?
C15 H15B 0.9800 . ?
C15 H15C 0.9800 . ?
C16 C22 1.391(4) . ?
C16 C21 1.427(4) . ?
C16 C17 1.428(4) . ?
C17 C18 1.346(4) . ?
C17 H17 0.9500 . ?
C18 F1 1.345(3) . ?
C18 C19 1.434(4) . ?
C19 C23 1.393(4) . ?
C19 C20 1.427(4) . ?
C20 C21 1.336(4) . ?
C20 H20 0.9500 . ?
C21 F2 1.352(3) . ?
C22 C25 1.430(4) . ?
C22 C24 1.432(5) . ?
C23 C27 1.420(4) . ?
C23 C26 1.433(5) . ?
C24 N1 1.137(4) . ?
C25 N2 1.149(4) . ?
C26 N3 1.146(4) . ?
C27 N4 1.144(4) . ?
C28 C34 1.389(4) . ?
C28 C29 1.424(4) . ?
C28 C33 1.436(4) . ?
C29 C30 1.345(4) . ?
C29 H29 0.9500 . ?
C30 F3 1.343(3) . ?
C30 C31 1.430(4) . ?
C31 C35 1.387(4) . ?
C31 C32 1.429(4) . ?
C32 C33 1.334(4) . ?
C32 H32 0.9500 . ?
C33 F4 1.342(3) . ?
C34 C37 1.421(4) . ?
C34 C36 1.427(5) . ?
C35 C39 1.430(4) . ?
C35 C38 1.431(5) . ?
C36 N5 1.145(4) . ?
C37 N6 1.146(4) . ?
C38 N7 1.137(4) . ?
C39 N8 1.150(4) . ?
 
loop_
 _geom_angle_atom_site_label_1
 _geom_angle_atom_site_label_2
 _geom_angle_atom_site_label_3
 _geom_angle
 _geom_angle_site_symmetry_1
 _geom_angle_site_symmetry_3
 _geom_angle_publ_flag
C2 C1 C5 106.1(3) . . ?
C2 C1 C11 127.3(3) . . ?
C5 C1 C11 126.5(3) . . ?
C3 C2 C1 109.4(3) . . ?
C3 C2 H2 125.3 . . ?
C1 C2 H2 125.3 . . ?
C4 C3 C2 107.4(3) . . ?
C4 C3 H3 126.3 . . ?
C2 C3 H3 126.3 . . ?
C3 C4 C5 108.4(3) . . ?
C3 C4 H4 125.8 . . ?
C5 C4 H4 125.8 . . ?
C4 C5 C1 108.7(3) . . ?
C4 C5 H5 125.6 . . ?
C1 C5 H5 125.6 . . ?
C7 C6 C10 108.5(4) . . ?
C7 C6 H6 125.8 . . ?
C10 C6 H6 125.8 . . ?
C6 C7 C8 108.5(4) . . ?
C6 C7 H7 125.7 . . ?
C8 C7 H7 125.7 . . ?
C9 C8 C7 108.7(3) . . ?
C9 C8 H8 125.6 . . ?
C7 C8 H8 125.6 . . ?
C8 C9 C10 108.0(4) . . ?
C8 C9 H9 126.0 . . ?
C10 C9 H9 126.0 . . ?
C6 C10 C9 106.2(4) . . ?
C6 C10 H10 126.9 . . ?
C9 C10 H10 126.9 . . ?
C1 C11 C12 110.3(3) . . ?
C1 C11 C13 110.7(3) . . ?
C12 C11 C13 109.2(3) . . ?
C1 C11 C14 105.0(3) . . ?
C12 C11 C14 111.8(4) . . ?
C13 C11 C14 109.7(3) . . ?
C11 C12 H12A 109.5 . . ?
C11 C12 H12B 109.5 . . ?
H12A C12 H12B 109.5 . . ?
C11 C12 H12C 109.5 . . ?
H12A C12 H12C 109.5 . . ?
H12B C12 H12C 109.5 . . ?
C11 C13 H13A 109.5 . . ?
C11 C13 H13B 109.5 . . ?
H13A C13 H13B 109.5 . . ?
C11 C13 H13C 109.5 . . ?
H13A C13 H13C 109.5 . . ?
H13B C13 H13C 109.5 . . ?
C15 C14 C11 115.1(4) . . ?
C15 C14 H14A 108.5 . . ?
C11 C14 H14A 108.5 . . ?
C15 C14 H14B 108.5 . . ?
C11 C14 H14B 108.5 . . ?
H14A C14 H14B 107.5 . . ?
C14 C15 H15A 109.5 . . ?
C14 C15 H15B 109.5 . . ?
H15A C15 H15B 109.5 . . ?
C14 C15 H15C 109.5 . . ?
H15A C15 H15C 109.5 . . ?
H15B C15 H15C 109.5 . . ?
C22 C16 C21 123.3(3) . . ?
C22 C16 C17 121.6(3) . . ?
C21 C16 C17 115.1(3) . . ?
C18 C17 C16 120.3(3) . . ?
C18 C17 H17 119.9 . . ?
C16 C17 H17 119.9 . . ?
F1 C18 C17 119.1(3) . . ?
F1 C18 C19 116.7(3) . . ?
C17 C18 C19 124.2(3) . . ?
C23 C19 C20 120.6(3) . . ?
C23 C19 C18 124.2(3) . . ?
C20 C19 C18 115.2(3) . . ?
C21 C20 C19 120.4(3) . . ?
C21 C20 H20 119.8 . . ?
C19 C20 H20 119.8 . . ?
C20 C21 F2 118.5(3) . . ?
C20 C21 C16 124.8(3) . . ?
F2 C21 C16 116.7(3) . . ?
C16 C22 C25 120.7(3) . . ?
C16 C22 C24 125.6(3) . . ?
C25 C22 C24 113.6(3) . . ?
C19 C23 C27 120.0(3) . . ?
C19 C23 C26 125.3(3) . . ?
C27 C23 C26 114.7(3) . . ?
N1 C24 C22 175.7(4) . . ?
N2 C25 C22 178.2(4) . . ?
N3 C26 C23 175.0(4) . . ?
N4 C27 C23 178.4(3) . . ?
C34 C28 C29 121.2(3) . . ?
C34 C28 C33 123.9(3) . . ?
C29 C28 C33 114.9(3) . . ?
C30 C29 C28 120.7(3) . . ?
C30 C29 H29 119.6 . . ?
C28 C29 H29 119.6 . . ?
F3 C30 C29 118.8(3) . . ?
F3 C30 C31 117.0(3) . . ?
C29 C30 C31 124.1(3) . . ?
C35 C31 C32 121.3(3) . . ?
C35 C31 C30 123.6(3) . . ?
C32 C31 C30 115.1(3) . . ?
C33 C32 C31 120.7(3) . . ?
C33 C32 H32 119.7 . . ?
C31 C32 H32 119.7 . . ?
C32 C33 F4 119.0(3) . . ?
C32 C33 C28 124.4(3) . . ?
F4 C33 C28 116.5(3) . . ?
C28 C34 C37 120.3(3) . . ?
C28 C34 C36 125.4(3) . . ?
C37 C34 C36 114.2(3) . . ?
C31 C35 C39 120.4(3) . . ?
C31 C35 C38 125.4(3) . . ?
C39 C35 C38 114.1(3) . . ?
N5 C36 C34 176.2(4) . . ?
N6 C37 C34 179.8(5) . . ?
N7 C38 C35 175.7(4) . . ?
N8 C39 C35 179.6(4) . . ?
 
_diffrn_measured_fraction_theta_max    0.983
_diffrn_reflns_theta_full              28.36
_diffrn_measured_fraction_theta_full   0.983
_refine_diff_density_max    0.564
_refine_diff_density_min   -0.444
_refine_diff_density_rms    0.081
 
data_7-iPr2F0
 
_audit_creation_method            SHELXL-97
_chemical_name_systematic
;
 ?
;
_chemical_name_common             ?
_chemical_melting_point           ?
_chemical_formula_moiety          'C16 H22 Fe, 2(C12 H4 N4) '
_chemical_formula_sum
 'C40 H30 Fe N8'
_chemical_formula_weight          678.57
 
loop_
 _atom_type_symbol
 _atom_type_description
 _atom_type_scat_dispersion_real
 _atom_type_scat_dispersion_imag
 _atom_type_scat_source
 'C'  'C'   0.0033   0.0016
 'International Tables Vol C Tables 4.2.6.8 and 6.1.1.4'
 'H'  'H'   0.0000   0.0000
 'International Tables Vol C Tables 4.2.6.8 and 6.1.1.4'
 'N'  'N'   0.0061   0.0033
 'International Tables Vol C Tables 4.2.6.8 and 6.1.1.4'
 'Fe'  'Fe'   0.3463   0.8444
 'International Tables Vol C Tables 4.2.6.8 and 6.1.1.4'
 
_symmetry_cell_setting           'Monoclinic'
_symmetry_space_group_name_H-M   'P 21/c'
_symmetry_space_group_name_Hall    '-P 2ybc'
loop_
 _symmetry_equiv_pos_as_xyz
 'x, y, z'
 '-x, y+1/2, -z+1/2'
 '-x, -y, -z'
 'x, -y-1/2, z-1/2'
 
_cell_length_a                    6.6911(4)
_cell_length_b                    15.5049(10)
_cell_length_c                    31.364(2)
_cell_angle_alpha                 90.00
_cell_angle_beta                  93.0530(10)
_cell_angle_gamma                 90.00
_cell_volume                      3249.2(4)
_cell_formula_units_Z             4
_cell_measurement_temperature     173
_cell_measurement_reflns_used     6018
_cell_measurement_theta_min       2.35
_cell_measurement_theta_max       28.28
_exptl_crystal_description        'prism'
_exptl_crystal_colour             'black'
_exptl_crystal_size_max           0.80
_exptl_crystal_size_mid           0.25
_exptl_crystal_size_min           0.15
_exptl_crystal_density_meas       ?
_exptl_crystal_density_diffrn     1.387
_exptl_crystal_density_method     'not measured'
_exptl_crystal_F_000              1408
_exptl_absorpt_coefficient_mu     0.508
_exptl_absorpt_correction_type    empirical
_exptl_absorpt_correction_T_min   0.6868
_exptl_absorpt_correction_T_max   0.9277
_exptl_absorpt_process_details    
;
SADABS Sheldrick 1996
;
_exptl_special_details
;
 ?
;
 
_diffrn_ambient_temperature       173
_diffrn_radiation_wavelength      0.71073
_diffrn_radiation_type            MoK\a
_diffrn_radiation_source          'Bruker TXS fine-focus rotating anode' 
_diffrn_radiation_monochromator   'Bruker Helios multilayer confocal mirror' 
_diffrn_measurement_device_type   'Bruker APEXII CCD area detector' 
_diffrn_measurement_method        'phi and omega scans' 
_diffrn_detector_area_resol_mean  8.333
_diffrn_standards_number          ?
_diffrn_standards_interval_count  ?
_diffrn_standards_interval_time   ?
_diffrn_standards_decay_%         ?
_diffrn_reflns_number             19320
_diffrn_reflns_av_R_equivalents   0.0198
_diffrn_reflns_av_unetI/netI     0.0219
_diffrn_reflns_limit_h_min        -8
_diffrn_reflns_limit_h_max        7
_diffrn_reflns_limit_k_min        -18
_diffrn_reflns_limit_k_max        18
_diffrn_reflns_limit_l_min        -37
_diffrn_reflns_limit_l_max        35
_diffrn_reflns_theta_min          2.35
_diffrn_reflns_theta_max          25.35
_reflns_number_total              5996
_reflns_number_gt                 5315
_reflns_threshold_expression      >2\s
 
_computing_data_collection        'APEX2 '
_computing_cell_refinement        'APEX2 (Bruker AXS, 2006)'
_computing_data_reduction         'SAINT (Bruker AXS, 2004)'
_computing_structure_solution     'SHELXS-97 (Sheldrick, 1997)'
_computing_structure_refinement   'SHELXL-97 (Sheldrick, 1997)'
_computing_molecular_graphics     'XSHEL (Bruker AXS,2002)'
_computing_publication_material   'XCIF (Bruker AXS, 2001)' 
_refine_special_details
;
 Refinement of F^2^ against ALL reflections.  The weighted R-factor wR and
 goodness of fit S are based on F^2^, conventional R-factors R are based
 on F, with F set to zero for negative F^2^. The threshold expression of
 F^2^ > 2\s(F^2^) is used only for calculating R-factors(gt) etc. and is
 not relevant to the choice of reflections for refinement.  R-factors based
 on F^2^ are statistically about twice as large as those based on F, and R-
 factors based on ALL data will be even larger.
;
 
_refine_ls_structure_factor_coef  Fsqd
_refine_ls_matrix_type            full
_refine_ls_weighting_scheme       calc
_refine_ls_weighting_details
 'calc w=1/[\s^2^(Fo^2^)+(0.0512P)^2^+7.7007P] where P=(Fo^2^+2Fc^2^)/3'
_atom_sites_solution_primary      direct
_atom_sites_solution_secondary    difmap
_atom_sites_solution_hydrogens    geom
_refine_ls_hydrogen_treatment     constr

_refine_ls_extinction_method      none
_refine_ls_extinction_coef        ?
_refine_ls_number_reflns          5996
_refine_ls_number_parameters      447
_refine_ls_number_restraints      60
_refine_ls_R_factor_all           0.0586
_refine_ls_R_factor_gt            0.0503
_refine_ls_wR_factor_ref          0.1539
_refine_ls_wR_factor_gt           0.1455
_refine_ls_goodness_of_fit_ref    1.177
_refine_ls_restrained_S_all       1.180
_refine_ls_shift/su_max           0.000
_refine_ls_shift/su_mean          0.000
 
loop_
 _atom_site_label
 _atom_site_type_symbol
 _atom_site_fract_x
 _atom_site_fract_y
 _atom_site_fract_z
 _atom_site_U_iso_or_equiv
 _atom_site_adp_type
 _atom_site_occupancy
 _atom_site_symmetry_multiplicity
 _atom_site_calc_flag
 _atom_site_refinement_flags
 _atom_site_disorder_assembly
 _atom_site_disorder_group
C1 C 0.3515(5) 0.5854(2) 0.72325(11) 0.0243(7) Uani 1 1 d . . .
C2 C 0.3607(5) 0.6768(2) 0.72212(12) 0.0281(8) Uani 1 1 d . . .
H2 H 0.3551 0.7113 0.6970 0.034 Uiso 1 1 calc R . .
C3 C 0.3796(5) 0.7083(2) 0.76457(13) 0.0312(8) Uani 1 1 d . . .
H3 H 0.3883 0.7672 0.7727 0.037 Uiso 1 1 calc R . .
C4 C 0.3834(5) 0.6375(3) 0.79250(11) 0.0283(8) Uani 1 1 d . . .
H4 H 0.3945 0.6401 0.8228 0.034 Uiso 1 1 calc R . .
C5 C 0.3677(5) 0.5617(2) 0.76733(11) 0.0247(7) Uani 1 1 d . . .
H5 H 0.3679 0.5043 0.7780 0.030 Uiso 1 1 calc R . .
C6 C 0.8872(4) 0.5694(2) 0.77834(10) 0.0208(7) Uani 1 1 d . . .
C7 C 0.8729(5) 0.5655(2) 0.73284(11) 0.0249(7) Uani 1 1 d . . .
H7 H 0.8688 0.5144 0.7161 0.030 Uiso 1 1 calc R . .
C8 C 0.8658(5) 0.6521(2) 0.71671(12) 0.0286(8) Uani 1 1 d . . .
H8 H 0.8572 0.6687 0.6875 0.034 Uiso 1 1 calc R . .
C9 C 0.8738(5) 0.7079(2) 0.75213(12) 0.0312(8) Uani 1 1 d . . .
H9 H 0.8714 0.7691 0.7509 0.037 Uiso 1 1 calc R . .
C10 C 0.8859(5) 0.6579(2) 0.78971(12) 0.0267(7) Uani 1 1 d . . .
H10 H 0.8921 0.6799 0.8180 0.032 Uiso 1 1 calc R . .
C11 C 0.3251(6) 0.5272(3) 0.68531(13) 0.0416(10) Uani 1 1 d U . .
H11 H 0.1797 0.5284 0.6762 0.050 Uiso 1 1 calc R . .
C12 C 0.3765(8) 0.4340(3) 0.69645(18) 0.0630(14) Uani 1 1 d U . .
H12A H 0.5192 0.4296 0.7050 0.095 Uiso 1 1 calc R . .
H12B H 0.3466 0.3973 0.6715 0.095 Uiso 1 1 calc R . .
H12C H 0.2969 0.4150 0.7200 0.095 Uiso 1 1 calc R . .
C13 C 0.4389(8) 0.5591(4) 0.64750(14) 0.0608(14) Uani 1 1 d U . .
H13A H 0.4030 0.6193 0.6414 0.091 Uiso 1 1 calc R . .
H13B H 0.4037 0.5236 0.6224 0.091 Uiso 1 1 calc R . .
H13C H 0.5831 0.5550 0.6544 0.091 Uiso 1 1 calc R . .
C14 C 0.9078(5) 0.4940(2) 0.80846(11) 0.0286(8) Uani 1 1 d U . .
H14 H 1.0535 0.4886 0.8169 0.034 Uiso 1 1 calc R . .
C15 C 0.8440(7) 0.4087(3) 0.78755(13) 0.0403(9) Uani 1 1 d U . .
H15A H 0.6996 0.4097 0.7804 0.060 Uiso 1 1 calc R . .
H15B H 0.8756 0.3612 0.8074 0.060 Uiso 1 1 calc R . .
H15C H 0.9158 0.4005 0.7614 0.060 Uiso 1 1 calc R . .
C16 C 0.8005(7) 0.5081(3) 0.84932(13) 0.0446(10) Uani 1 1 d U . .
H16A H 0.8526 0.5603 0.8637 0.067 Uiso 1 1 calc R . .
H16B H 0.8228 0.4583 0.8682 0.067 Uiso 1 1 calc R . .
H16C H 0.6567 0.5149 0.8425 0.067 Uiso 1 1 calc R . .
Fe1 Fe 0.62260(6) 0.63089(3) 0.753493(14) 0.01980(15) Uani 1 1 d . . .
C17 C 0.8683(5) 0.1992(2) 0.53129(10) 0.0236(7) Uani 1 1 d . . .
H17 H 0.8688 0.1383 0.5347 0.028 Uiso 1 1 calc R . .
C18 C 0.8641(5) 0.2357(2) 0.48911(10) 0.0213(7) Uani 1 1 d . . .
C19 C 0.8620(5) 0.3284(2) 0.48508(11) 0.0245(7) Uani 1 1 d . . .
H19 H 0.8572 0.3539 0.4575 0.029 Uiso 1 1 calc R . .
C20 C 0.8667(5) 0.3792(2) 0.51991(11) 0.0241(7) Uani 1 1 d . . .
H20 H 0.8654 0.4401 0.5165 0.029 Uiso 1 1 calc R . .
C21 C 0.8738(5) 0.3430(2) 0.56236(10) 0.0222(7) Uani 1 1 d . . .
C22 C 0.8714(5) 0.2505(2) 0.56619(10) 0.0234(7) Uani 1 1 d . . .
H22 H 0.8721 0.2250 0.5937 0.028 Uiso 1 1 calc R . .
C23 C 0.8587(5) 0.1830(2) 0.45336(11) 0.0227(7) Uani 1 1 d . . .
C24 C 0.8836(5) 0.3956(2) 0.59789(11) 0.0244(7) Uani 1 1 d . . .
C25 C 0.8558(5) 0.0913(2) 0.45624(11) 0.0272(8) Uani 1 1 d . . .
C26 C 0.8543(5) 0.2174(2) 0.41088(11) 0.0269(7) Uani 1 1 d . . .
C27 C 0.8927(5) 0.4879(2) 0.59508(11) 0.0273(8) Uani 1 1 d . . .
C28 C 0.8859(5) 0.3635(2) 0.64042(11) 0.0273(7) Uani 1 1 d . . .
N1 N 0.8523(6) 0.0175(2) 0.45759(10) 0.0388(8) Uani 1 1 d . . .
N2 N 0.8514(6) 0.2431(2) 0.37654(10) 0.0401(8) Uani 1 1 d . . .
N3 N 0.9015(6) 0.5615(2) 0.59455(11) 0.0397(8) Uani 1 1 d . . .
N4 N 0.8881(6) 0.3412(2) 0.67530(10) 0.0409(8) Uani 1 1 d . . .
C29 C 0.3539(5) 0.1558(2) 0.43485(10) 0.0218(7) Uani 1 1 d . . .
C30 C 0.3607(5) 0.2476(2) 0.43245(11) 0.0242(7) Uani 1 1 d . . .
H30 H 0.3586 0.2745 0.4052 0.029 Uiso 1 1 calc R . .
C31 C 0.3700(5) 0.2976(2) 0.46806(11) 0.0240(7) Uani 1 1 d . . .
H31 H 0.3745 0.3586 0.4653 0.029 Uiso 1 1 calc R . .
C32 C 0.3731(5) 0.2599(2) 0.50962(11) 0.0229(7) Uani 1 1 d . . .
C33 C 0.3682(5) 0.1679(2) 0.51240(11) 0.0245(7) Uani 1 1 d . . .
H33 H 0.3716 0.1411 0.5397 0.029 Uiso 1 1 calc R . .
C34 C 0.3586(5) 0.1183(2) 0.47672(11) 0.0249(7) Uani 1 1 d . . .
H34 H 0.3550 0.0573 0.4795 0.030 Uiso 1 1 calc R . .
C35 C 0.3406(5) 0.1038(2) 0.39819(11) 0.0249(7) Uani 1 1 d . . .
C36 C 0.3772(5) 0.3112(2) 0.54651(11) 0.0244(7) Uani 1 1 d . . .
C37 C 0.3248(6) 0.0125(2) 0.40001(11) 0.0275(8) Uani 1 1 d . . .
C38 C 0.3424(5) 0.1383(2) 0.35621(11) 0.0262(7) Uani 1 1 d . . .
C39 C 0.3735(5) 0.4029(2) 0.54447(11) 0.0275(8) Uani 1 1 d . . .
C40 C 0.3736(6) 0.2750(2) 0.58819(11) 0.0295(8) Uani 1 1 d . . .
N5 N 0.3693(6) 0.2479(2) 0.62230(10) 0.0440(9) Uani 1 1 d . . .
N6 N 0.3704(6) 0.4768(2) 0.54359(11) 0.0410(8) Uani 1 1 d . . .
N7 N 0.3424(5) 0.1632(2) 0.32151(10) 0.0379(8) Uani 1 1 d . . .
N8 N 0.3100(6) -0.0613(2) 0.40019(11) 0.0412(8) Uani 1 1 d . . .
 
loop_
 _atom_site_aniso_label
 _atom_site_aniso_U_11
 _atom_site_aniso_U_22
 _atom_site_aniso_U_33
 _atom_site_aniso_U_23
 _atom_site_aniso_U_13
 _atom_site_aniso_U_12
C1 0.0111(15) 0.037(2) 0.0243(17) -0.0054(14) 0.0011(12) -0.0002(13)
C2 0.0167(16) 0.037(2) 0.0303(19) 0.0090(15) 0.0020(13) 0.0055(14)
C3 0.0203(17) 0.0282(19) 0.045(2) -0.0091(17) 0.0019(15) 0.0058(14)
C4 0.0175(16) 0.045(2) 0.0231(17) -0.0085(16) 0.0060(13) 0.0000(15)
C5 0.0152(15) 0.0284(18) 0.0310(18) 0.0039(15) 0.0051(13) -0.0024(13)
C6 0.0114(14) 0.0263(17) 0.0248(17) 0.0049(13) 0.0016(12) -0.0004(12)
C7 0.0171(16) 0.0292(18) 0.0288(18) -0.0016(14) 0.0054(13) 0.0029(14)
C8 0.0172(16) 0.038(2) 0.0312(19) 0.0149(16) 0.0073(14) 0.0013(14)
C9 0.0191(17) 0.0250(18) 0.049(2) 0.0064(16) 0.0017(16) -0.0059(14)
C10 0.0164(16) 0.0320(19) 0.0311(19) -0.0033(15) -0.0032(13) -0.0035(14)
C11 0.0242(18) 0.065(3) 0.036(2) -0.023(2) 0.0002(15) 0.0013(18)
C12 0.061(3) 0.051(3) 0.077(3) -0.039(3) 0.009(3) -0.010(2)
C13 0.061(3) 0.094(4) 0.028(2) -0.018(2) 0.006(2) 0.012(3)
C14 0.0257(17) 0.0338(19) 0.0261(18) 0.0081(15) 0.0002(14) 0.0025(15)
C15 0.054(2) 0.029(2) 0.038(2) 0.0056(17) 0.0060(18) 0.0053(18)
C16 0.060(3) 0.048(2) 0.026(2) 0.0070(18) 0.0074(18) 0.002(2)
Fe1 0.0162(2) 0.0218(3) 0.0215(3) 0.00041(19) 0.00242(18) 0.00002(18)
C17 0.0261(17) 0.0228(17) 0.0218(17) 0.0029(13) 0.0008(13) 0.0009(14)
C18 0.0179(15) 0.0250(17) 0.0211(16) 0.0019(13) 0.0020(12) -0.0003(13)
C19 0.0272(17) 0.0270(18) 0.0191(16) 0.0037(14) -0.0001(13) -0.0004(14)
C20 0.0275(17) 0.0202(16) 0.0245(17) 0.0032(13) 0.0010(13) -0.0001(13)
C21 0.0194(16) 0.0255(17) 0.0218(16) 0.0024(13) 0.0010(12) -0.0003(13)
C22 0.0271(17) 0.0234(17) 0.0199(16) 0.0055(13) 0.0024(13) 0.0002(14)
C23 0.0228(16) 0.0237(17) 0.0216(17) 0.0024(13) 0.0011(13) -0.0007(13)
C24 0.0260(17) 0.0247(17) 0.0228(17) 0.0007(14) 0.0034(13) 0.0002(14)
C25 0.0338(19) 0.031(2) 0.0168(16) 0.0001(14) 0.0004(14) -0.0005(15)
C26 0.0343(19) 0.0245(17) 0.0218(18) -0.0035(14) -0.0002(14) -0.0004(15)
C27 0.0312(19) 0.031(2) 0.0195(17) -0.0021(14) 0.0024(14) 0.0005(15)
C28 0.0317(19) 0.0264(18) 0.0240(19) -0.0040(15) 0.0043(14) 0.0003(15)
N1 0.060(2) 0.0296(19) 0.0273(17) 0.0009(14) 0.0047(15) -0.0013(16)
N2 0.060(2) 0.0372(19) 0.0224(17) 0.0007(14) 0.0001(15) -0.0001(17)
N3 0.053(2) 0.0272(18) 0.0388(19) -0.0005(14) 0.0025(16) -0.0010(15)
N4 0.055(2) 0.043(2) 0.0249(18) 0.0017(15) 0.0065(15) -0.0009(17)
C29 0.0193(16) 0.0238(17) 0.0225(16) 0.0017(13) 0.0012(12) 0.0006(13)
C30 0.0272(17) 0.0247(17) 0.0207(16) 0.0050(13) 0.0012(13) 0.0012(14)
C31 0.0272(17) 0.0214(17) 0.0233(17) 0.0033(13) 0.0005(13) 0.0021(13)
C32 0.0196(16) 0.0261(17) 0.0229(17) 0.0011(14) 0.0020(13) 0.0008(13)
C33 0.0276(17) 0.0266(17) 0.0193(16) 0.0049(13) 0.0014(13) 0.0018(14)
C34 0.0284(18) 0.0200(17) 0.0265(18) 0.0023(14) 0.0028(14) 0.0001(13)
C35 0.0276(17) 0.0237(17) 0.0235(17) 0.0009(14) 0.0031(13) -0.0003(14)
C36 0.0247(17) 0.0261(17) 0.0223(17) 0.0017(14) 0.0012(13) 0.0011(14)
C37 0.035(2) 0.029(2) 0.0186(17) -0.0004(14) 0.0044(14) 0.0010(15)
C38 0.0299(18) 0.0238(17) 0.0251(19) -0.0057(14) 0.0026(14) -0.0017(14)
C39 0.0312(19) 0.033(2) 0.0177(16) -0.0026(14) 0.0002(14) 0.0031(15)
C40 0.034(2) 0.0289(19) 0.0252(19) -0.0043(15) 0.0023(15) 0.0044(15)
N5 0.065(2) 0.043(2) 0.0237(18) 0.0034(15) 0.0048(16) 0.0055(18)
N6 0.066(2) 0.0278(19) 0.0294(18) -0.0038(14) 0.0032(16) 0.0040(16)
N7 0.050(2) 0.0393(19) 0.0243(17) 0.0029(14) 0.0014(14) -0.0014(16)
N8 0.062(2) 0.0279(18) 0.0347(18) -0.0010(14) 0.0113(16) -0.0035(16)
 
_geom_special_details
;
 All s.u.'s (except the s.u. in the dihedral angle between two l.s. planes)
 are estimated using the full covariance matrix.  The cell s.u.'s are taken
 into account individually in the estimation of s.u.'s in distances, angles
 and torsion angles; correlations between s.u.'s in cell parameters are only
 used when they are defined by crystal symmetry.  An approximate (isotropic)
 treatment of cell s.u.'s is used for estimating s.u.'s involving l.s. planes.
;
 
loop_
 _geom_bond_atom_site_label_1
 _geom_bond_atom_site_label_2
 _geom_bond_distance
 _geom_bond_site_symmetry_2
 _geom_bond_publ_flag
C1 C2 1.419(5) . ?
C1 C5 1.429(5) . ?
C1 C11 1.497(5) . ?
C2 C3 1.417(5) . ?
C2 H2 0.9500 . ?
C3 C4 1.403(5) . ?
C3 H3 0.9500 . ?
C4 C5 1.418(5) . ?
C4 H4 0.9500 . ?
C5 H5 0.9500 . ?
C6 C10 1.418(5) . ?
C6 C7 1.427(5) . ?
C6 C14 1.504(5) . ?
C7 C8 1.434(5) . ?
C7 H7 0.9500 . ?
C8 C9 1.406(5) . ?
C8 H8 0.9500 . ?
C9 C10 1.409(5) . ?
C9 H9 0.9500 . ?
C10 H10 0.9500 . ?
C11 C12 1.522(7) . ?
C11 C13 1.526(6) . ?
C11 H11 1.0000 . ?
C12 H12A 0.9800 . ?
C12 H12B 0.9800 . ?
C12 H12C 0.9800 . ?
C13 H13A 0.9800 . ?
C13 H13B 0.9800 . ?
C13 H13C 0.9800 . ?
C14 C16 1.518(5) . ?
C14 C15 1.528(5) . ?
C14 H14 1.0000 . ?
C15 H15A 0.9800 . ?
C15 H15B 0.9800 . ?
C15 H15C 0.9800 . ?
C16 H16A 0.9800 . ?
C16 H16B 0.9800 . ?
C16 H16C 0.9800 . ?
C17 C22 1.353(5) . ?
C17 C18 1.438(4) . ?
C17 H17 0.9500 . ?
C18 C23 1.386(5) . ?
C18 C19 1.443(5) . ?
C19 C20 1.345(5) . ?
C19 H19 0.9500 . ?
C20 C21 1.444(5) . ?
C20 H20 0.9500 . ?
C21 C24 1.380(5) . ?
C21 C22 1.439(5) . ?
C22 H22 0.9500 . ?
C23 C25 1.425(5) . ?
C23 C26 1.434(5) . ?
C24 C28 1.424(5) . ?
C24 C27 1.434(5) . ?
C25 N1 1.145(5) . ?
C26 N2 1.148(5) . ?
C27 N3 1.143(5) . ?
C28 N4 1.147(5) . ?
C29 C35 1.404(5) . ?
C29 C30 1.426(5) . ?
C29 C34 1.435(5) . ?
C30 C31 1.359(5) . ?
C30 H30 0.9500 . ?
C31 C32 1.428(5) . ?
C31 H31 0.9500 . ?
C32 C36 1.403(5) . ?
C32 C33 1.429(5) . ?
C33 C34 1.357(5) . ?
C33 H33 0.9500 . ?
C34 H34 0.9500 . ?
C35 C37 1.421(5) . ?
C35 C38 1.422(5) . ?
C36 C40 1.424(5) . ?
C36 C39 1.424(5) . ?
C37 N8 1.149(5) . ?
C38 N7 1.155(5) . ?
C39 N6 1.146(5) . ?
C40 N5 1.151(5) . ?
 
loop_
 _geom_angle_atom_site_label_1
 _geom_angle_atom_site_label_2
 _geom_angle_atom_site_label_3
 _geom_angle
 _geom_angle_site_symmetry_1
 _geom_angle_site_symmetry_3
 _geom_angle_publ_flag
C2 C1 C5 106.3(3) . . ?
C2 C1 C11 125.9(4) . . ?
C5 C1 C11 127.8(4) . . ?
C3 C2 C1 108.8(3) . . ?
C3 C2 H2 125.6 . . ?
C1 C2 H2 125.6 . . ?
C4 C3 C2 108.4(3) . . ?
C4 C3 H3 125.8 . . ?
C2 C3 H3 125.8 . . ?
C3 C4 C5 107.6(3) . . ?
C3 C4 H4 126.2 . . ?
C5 C4 H4 126.2 . . ?
C4 C5 C1 108.9(3) . . ?
C4 C5 H5 125.5 . . ?
C1 C5 H5 125.5 . . ?
C10 C6 C7 106.9(3) . . ?
C10 C6 C14 126.5(3) . . ?
C7 C6 C14 126.5(3) . . ?
C6 C7 C8 108.2(3) . . ?
C6 C7 H7 125.9 . . ?
C8 C7 H7 125.9 . . ?
C9 C8 C7 107.3(3) . . ?
C9 C8 H8 126.3 . . ?
C7 C8 H8 126.3 . . ?
C8 C9 C10 108.7(3) . . ?
C8 C9 H9 125.7 . . ?
C10 C9 H9 125.7 . . ?
C9 C10 C6 108.8(3) . . ?
C9 C10 H10 125.6 . . ?
C6 C10 H10 125.6 . . ?
C1 C11 C12 112.0(4) . . ?
C1 C11 C13 112.3(4) . . ?
C12 C11 C13 111.7(4) . . ?
C1 C11 H11 106.8 . . ?
C12 C11 H11 106.8 . . ?
C13 C11 H11 106.8 . . ?
C11 C12 H12A 109.5 . . ?
C11 C12 H12B 109.5 . . ?
H12A C12 H12B 109.5 . . ?
C11 C12 H12C 109.5 . . ?
H12A C12 H12C 109.5 . . ?
H12B C12 H12C 109.5 . . ?
C11 C13 H13A 109.5 . . ?
C11 C13 H13B 109.5 . . ?
H13A C13 H13B 109.5 . . ?
C11 C13 H13C 109.5 . . ?
H13A C13 H13C 109.5 . . ?
H13B C13 H13C 109.5 . . ?
C6 C14 C16 112.8(3) . . ?
C6 C14 C15 112.9(3) . . ?
C16 C14 C15 110.7(3) . . ?
C6 C14 H14 106.7 . . ?
C16 C14 H14 106.7 . . ?
C15 C14 H14 106.7 . . ?
C14 C15 H15A 109.5 . . ?
C14 C15 H15B 109.5 . . ?
H15A C15 H15B 109.5 . . ?
C14 C15 H15C 109.5 . . ?
H15A C15 H15C 109.5 . . ?
H15B C15 H15C 109.5 . . ?
C14 C16 H16A 109.5 . . ?
C14 C16 H16B 109.5 . . ?
H16A C16 H16B 109.5 . . ?
C14 C16 H16C 109.5 . . ?
H16A C16 H16C 109.5 . . ?
H16B C16 H16C 109.5 . . ?
C22 C17 C18 120.8(3) . . ?
C22 C17 H17 119.6 . . ?
C18 C17 H17 119.6 . . ?
C23 C18 C17 120.7(3) . . ?
C23 C18 C19 121.1(3) . . ?
C17 C18 C19 118.2(3) . . ?
C20 C19 C18 120.8(3) . . ?
C20 C19 H19 119.6 . . ?
C18 C19 H19 119.6 . . ?
C19 C20 C21 121.3(3) . . ?
C19 C20 H20 119.3 . . ?
C21 C20 H20 119.3 . . ?
C24 C21 C22 121.5(3) . . ?
C24 C21 C20 120.8(3) . . ?
C22 C21 C20 117.7(3) . . ?
C17 C22 C21 121.2(3) . . ?
C17 C22 H22 119.4 . . ?
C21 C22 H22 119.4 . . ?
C18 C23 C25 122.5(3) . . ?
C18 C23 C26 122.0(3) . . ?
C25 C23 C26 115.5(3) . . ?
C21 C24 C28 123.2(3) . . ?
C21 C24 C27 122.7(3) . . ?
C28 C24 C27 114.1(3) . . ?
N1 C25 C23 178.5(4) . . ?
N2 C26 C23 178.5(4) . . ?
N3 C27 C24 177.3(4) . . ?
N4 C28 C24 177.0(4) . . ?
C35 C29 C30 122.1(3) . . ?
C35 C29 C34 120.9(3) . . ?
C30 C29 C34 117.0(3) . . ?
C31 C30 C29 121.8(3) . . ?
C31 C30 H30 119.1 . . ?
C29 C30 H30 119.1 . . ?
C30 C31 C32 120.9(3) . . ?
C30 C31 H31 119.5 . . ?
C32 C31 H31 119.5 . . ?
C36 C32 C31 121.3(3) . . ?
C36 C32 C33 121.0(3) . . ?
C31 C32 C33 117.7(3) . . ?
C34 C33 C32 121.0(3) . . ?
C34 C33 H33 119.5 . . ?
C32 C33 H33 119.5 . . ?
C33 C34 C29 121.5(3) . . ?
C33 C34 H34 119.2 . . ?
C29 C34 H34 119.2 . . ?
C29 C35 C37 122.8(3) . . ?
C29 C35 C38 122.6(3) . . ?
C37 C35 C38 114.6(3) . . ?
C32 C36 C40 122.2(3) . . ?
C32 C36 C39 122.0(3) . . ?
C40 C36 C39 115.7(3) . . ?
N8 C37 C35 177.9(4) . . ?
N7 C38 C35 177.4(4) . . ?
N6 C39 C36 178.8(4) . . ?
N5 C40 C36 178.2(4) . . ?
 
_diffrn_measured_fraction_theta_max    0.998
_diffrn_reflns_theta_full              25.35
_diffrn_measured_fraction_theta_full   0.998
_refine_diff_density_max    1.382
_refine_diff_density_min   -0.389
_refine_diff_density_rms    0.111
data_8-tBuF0
 
_audit_creation_method            SHELXL-97
_chemical_name_systematic
;
 ?
;
_chemical_name_common             ?
_chemical_melting_point           ?
_chemical_formula_moiety          ' C14 H18 Fe, 2(C12 H4 N4) '
_chemical_formula_sum
 'C38 H26 Fe N8'
_chemical_formula_weight          650.52
 
loop_
 _atom_type_symbol
 _atom_type_description
 _atom_type_scat_dispersion_real
 _atom_type_scat_dispersion_imag
 _atom_type_scat_source
 'C'  'C'   0.0033   0.0016
 'International Tables Vol C Tables 4.2.6.8 and 6.1.1.4'
 'H'  'H'   0.0000   0.0000
 'International Tables Vol C Tables 4.2.6.8 and 6.1.1.4'
 'N'  'N'   0.0061   0.0033
 'International Tables Vol C Tables 4.2.6.8 and 6.1.1.4'
 'Fe'  'Fe'   0.3463   0.8444
 'International Tables Vol C Tables 4.2.6.8 and 6.1.1.4'
 
_symmetry_cell_setting           'Triclinic'
_symmetry_space_group_name_H-M   'P -1'
_symmetry_space_group_name_Hall    '-P 1'
loop_
 _symmetry_equiv_pos_as_xyz
 'x, y, z'
 '-x, -y, -z'
 
_cell_length_a                    7.675(2)
_cell_length_b                    14.563(4)
_cell_length_c                    28.821(7)
_cell_angle_alpha                 86.928(3)
_cell_angle_beta                  89.697(4)
_cell_angle_gamma                 79.129(4)
_cell_volume                      3159.0(14)
_cell_formula_units_Z             4
_cell_measurement_temperature     173
_cell_measurement_reflns_used    1147
_cell_measurement_theta_min        2.79
_cell_measurement_theta_max       24.07
_exptl_crystal_description        'prism'
_exptl_crystal_colour             'black'
_exptl_crystal_size_max           0.30
_exptl_crystal_size_mid           0.10
_exptl_crystal_size_min           0.05
_exptl_crystal_density_meas       ?
_exptl_crystal_density_diffrn     1.368
_exptl_crystal_density_method     'not measured'
_exptl_crystal_F_000              1344
_exptl_absorpt_coefficient_mu     0.519
_exptl_absorpt_correction_type    empirical
_exptl_absorpt_correction_T_min   0.8598
_exptl_absorpt_correction_T_max   0.9745
_exptl_absorpt_process_details    
;
SADABS Sheldrick 1996
;
_exptl_special_details
;
 ?
;
 
_diffrn_ambient_temperature       173
_diffrn_radiation_wavelength      0.71073
_diffrn_radiation_type            MoK\a
_diffrn_radiation_source          'Bruker TXS fine-focus rotating anode' 
_diffrn_radiation_monochromator   'Bruker Helios multilayer confocal mirror' 
_diffrn_measurement_device_type   'Bruker APEXII CCD area detector' 
_diffrn_measurement_method        'phi and omega scans' 
_diffrn_detector_area_resol_mean  8.333
_diffrn_standards_number          ?
_diffrn_standards_interval_count  ?
_diffrn_standards_interval_time   ?
_diffrn_standards_decay_%         ?
_diffrn_reflns_number             18110
_diffrn_reflns_av_R_equivalents   0.0701
_diffrn_reflns_av_unetI/netI     0.1438
_diffrn_reflns_limit_h_min        -9
_diffrn_reflns_limit_h_max        7
_diffrn_reflns_limit_k_min        -17
_diffrn_reflns_limit_k_max        17
_diffrn_reflns_limit_l_min        -34
_diffrn_reflns_limit_l_max        34
_diffrn_reflns_theta_min          2.06
_diffrn_reflns_theta_max          25.35
_reflns_number_total              11505
_reflns_number_gt                 5498
_reflns_threshold_expression      >2\s(I)
 
_computing_data_collection        'APEX2 (Bruker AXS, 2006)'
_computing_cell_refinement        'APEX2 (Bruker AXS, 2006)'
_computing_data_reduction         'SAINT (Bruker AXS, 2004)'
_computing_structure_solution     'SHELXS-97 (Sheldrick, 1997)'
_computing_structure_refinement   'SHELXL-97 (Sheldrick, 1997)'
_computing_molecular_graphics     'XSHEL (Bruker AXS,2002)'
_computing_publication_material   'XCIF (Bruker AXS, 2001)' 
_refine_special_details
;
 Refinement of F^2^ against ALL reflections.  The weighted R-factor wR and
 goodness of fit S are based on F^2^, conventional R-factors R are based
 on F, with F set to zero for negative F^2^. The threshold expression of
 F^2^ > 2\s(F^2^) is used only for calculating R-factors(gt) etc. and is
 not relevant to the choice of reflections for refinement.  R-factors based
 on F^2^ are statistically about twice as large as those based on F, and R-
 factors based on ALL data will be even larger.
 During the refinement, the restraint commands 'SADI' was also used to refine 
 the distances of C-C bonds in the disorder of tert-butyl groups and Cp rings. 
 The restraint command 'SIMU' and 'ISOR' were also used to refine the non-H 
 atoms with NPD and ADP problems. These atoms are as follows: C1A C2A 
 C3A C4A C5A C1B C2B C3B C4B C5B C11 C12A C13A C14A C12B C13B C14B
 C15A C16A C17A C18A C19A C15B C16B C17B C18B C19B C25 C26A C27A 
 C28A C26B C27B C28B
;
 
_refine_ls_structure_factor_coef  Fsqd
_refine_ls_matrix_type            full
_refine_ls_weighting_scheme       calc
_refine_ls_weighting_details
 'calc w=1/[\s^2^(Fo^2^)+(0.0473P)^2^+0.0000P] where P=(Fo^2^+2Fc^2^)/3'
_atom_sites_solution_primary      direct
_atom_sites_solution_secondary    difmap
_atom_sites_solution_hydrogens    geom
_refine_ls_hydrogen_treatment     constr

_refine_ls_extinction_method      none
_refine_ls_extinction_coef        ?
_refine_ls_number_reflns          11505
_refine_ls_number_parameters      1000
_refine_ls_number_restraints      640
_refine_ls_R_factor_all           0.1627
_refine_ls_R_factor_gt            0.0683
_refine_ls_wR_factor_ref          0.1572
_refine_ls_wR_factor_gt           0.1204
_refine_ls_goodness_of_fit_ref    0.940
_refine_ls_restrained_S_all       0.935
_refine_ls_shift/su_max           0.001
_refine_ls_shift/su_mean          0.000
 
loop_
 _atom_site_label
 _atom_site_type_symbol
 _atom_site_fract_x
 _atom_site_fract_y
 _atom_site_fract_z
 _atom_site_U_iso_or_equiv
 _atom_site_adp_type
 _atom_site_occupancy
 _atom_site_symmetry_multiplicity
 _atom_site_calc_flag
 _atom_site_refinement_flags
 _atom_site_disorder_assembly
 _atom_site_disorder_group
C26A C 0.2300(11) 0.9494(7) 0.1220(3) 0.058(3) Uani 0.657(5) 1 d PDU A 1
H26A H 0.1557 0.9015 0.1225 0.087 Uiso 0.657(5) 1 calc PR A 1
H26B H 0.1568 1.0109 0.1142 0.087 Uiso 0.657(5) 1 calc PR A 1
H26C H 0.2843 0.9496 0.1527 0.087 Uiso 0.657(5) 1 calc PR A 1
C27A C 0.4774(13) 0.8287(5) 0.0941(4) 0.067(3) Uani 0.657(5) 1 d PDU A 1
H27A H 0.3940 0.7853 0.0944 0.100 Uiso 0.657(5) 1 calc PR A 1
H27B H 0.5382 0.8234 0.1242 0.100 Uiso 0.657(5) 1 calc PR A 1
H27C H 0.5650 0.8132 0.0695 0.100 Uiso 0.657(5) 1 calc PR A 1
C28A C 0.2814(13) 0.9379(7) 0.0373(3) 0.061(3) Uani 0.657(5) 1 d PDU A 1
H28A H 0.2038 0.8918 0.0363 0.091 Uiso 0.657(5) 1 calc PR A 1
H28B H 0.3695 0.9276 0.0125 0.091 Uiso 0.657(5) 1 calc PR A 1
H28C H 0.2102 1.0012 0.0330 0.091 Uiso 0.657(5) 1 calc PR A 1
C1A C 0.6226(14) 0.9424(6) 0.4408(3) 0.0312(19) Uani 0.657(5) 1 d PDU A 1
H1A H 0.6971 0.8824 0.4406 0.037 Uiso 0.657(5) 1 calc PR A 1
C2A C 0.6788(13) 1.0283(8) 0.4377(3) 0.033(2) Uani 0.657(5) 1 d PDU A 1
H2A H 0.7981 1.0373 0.4357 0.039 Uiso 0.657(5) 1 calc PR A 1
C3A C 0.5280(16) 1.0982(7) 0.4381(3) 0.037(2) Uani 0.657(5) 1 d PDU A 1
H3A H 0.5266 1.1637 0.4361 0.045 Uiso 0.657(5) 1 calc PR A 1
C4A C 0.3787(13) 1.0564(8) 0.4419(3) 0.038(2) Uani 0.657(5) 1 d PDU A 1
H4A H 0.2586 1.0879 0.4428 0.046 Uiso 0.657(5) 1 calc PR A 1
C5A C 0.4383(13) 0.9601(8) 0.4442(3) 0.0323(19) Uani 0.657(5) 1 d PDU A 1
H5A H 0.3657 0.9140 0.4476 0.039 Uiso 0.657(5) 1 calc PR A 1
C12A C 0.1319(11) 0.9174(11) 0.3520(3) 0.053(3) Uani 0.657(5) 1 d PDU A 1
H12A H 0.0583 0.8694 0.3508 0.079 Uiso 0.657(5) 1 calc PR A 1
H12B H 0.0631 0.9781 0.3408 0.079 Uiso 0.657(5) 1 calc PR A 1
H12C H 0.1696 0.9215 0.3842 0.079 Uiso 0.657(5) 1 calc PR A 1
C13A C 0.397(2) 0.7941(7) 0.3384(5) 0.060(4) Uani 0.657(5) 1 d PDU A 1
H13A H 0.3192 0.7483 0.3366 0.090 Uiso 0.657(5) 1 calc PR A 1
H13B H 0.4353 0.7962 0.3706 0.090 Uiso 0.657(5) 1 calc PR A 1
H13C H 0.5015 0.7757 0.3188 0.090 Uiso 0.657(5) 1 calc PR A 1
C14A C 0.2316(15) 0.8903(8) 0.2707(3) 0.064(3) Uani 0.657(5) 1 d PDU A 1
H14A H 0.1576 0.8427 0.2686 0.097 Uiso 0.657(5) 1 calc PR A 1
H14B H 0.3341 0.8758 0.2501 0.097 Uiso 0.657(5) 1 calc PR A 1
H14C H 0.1618 0.9520 0.2612 0.097 Uiso 0.657(5) 1 calc PR A 1
C15A C 0.7616(12) 0.9888(7) 0.1961(3) 0.051(2) Uani 0.657(5) 1 d PGDU A 1
H15A H 0.8605 0.9387 0.1951 0.061 Uiso 0.657(5) 1 calc PR A 1
C16A C 0.7658(15) 1.0852(6) 0.1925(4) 0.051(2) Uani 0.657(5) 1 d PDU A 1
H16A H 0.8703 1.1107 0.1881 0.062 Uiso 0.657(5) 1 calc PR A 1
C17A C 0.5939(13) 1.1383(8) 0.1962(4) 0.053(2) Uani 0.657(5) 1 d PDU A 1
H17A H 0.5599 1.2046 0.1949 0.064 Uiso 0.657(5) 1 calc PR A 1
C18A C 0.4829(16) 1.0718(7) 0.2022(6) 0.054(2) Uani 0.657(5) 1 d PDU A 1
H18A H 0.3580 1.0865 0.2062 0.065 Uiso 0.657(5) 1 calc PR A 1
C19A C 0.5831(12) 0.9809(8) 0.2015(4) 0.049(2) Uani 0.657(5) 1 d PDU A 1
H19A H 0.5384 0.9243 0.2042 0.059 Uiso 0.657(5) 1 calc PR A 1
C26B C 0.1808(14) 0.9635(15) 0.0908(9) 0.090(6) Uani 0.343(5) 1 d PDU A 2
H26D H 0.1174 0.9110 0.0909 0.135 Uiso 0.343(5) 1 calc PR A 2
H26E H 0.1377 1.0084 0.0650 0.135 Uiso 0.343(5) 1 calc PR A 2
H26F H 0.1600 0.9945 0.1202 0.135 Uiso 0.343(5) 1 calc PR A 2
C27B C 0.441(2) 0.8565(11) 0.1259(5) 0.057(5) Uani 0.343(5) 1 d PDU A 2
H27D H 0.3676 0.8080 0.1275 0.085 Uiso 0.343(5) 1 calc PR A 2
H27E H 0.4297 0.8889 0.1550 0.085 Uiso 0.343(5) 1 calc PR A 2
H27F H 0.5651 0.8274 0.1213 0.085 Uiso 0.343(5) 1 calc PR A 2
C28B C 0.450(3) 0.8687(14) 0.0441(6) 0.086(5) Uani 0.343(5) 1 d PDU A 2
H28D H 0.3830 0.8183 0.0411 0.128 Uiso 0.343(5) 1 calc PR A 2
H28E H 0.5755 0.8418 0.0495 0.128 Uiso 0.343(5) 1 calc PR A 2
H28F H 0.4373 0.9088 0.0154 0.128 Uiso 0.343(5) 1 calc PR A 2
C1B C 0.672(3) 0.9843(15) 0.4370(7) 0.035(3) Uani 0.343(5) 1 d PDU A 2
H1B H 0.7921 0.9531 0.4353 0.043 Uiso 0.343(5) 1 calc PR A 2
C2B C 0.612(2) 1.0848(14) 0.4368(6) 0.027(3) Uani 0.343(5) 1 d PDU A 2
H2B H 0.6845 1.1309 0.4358 0.033 Uiso 0.343(5) 1 calc PR A 2
C3B C 0.420(2) 1.1019(12) 0.4385(6) 0.027(3) Uani 0.343(5) 1 d PDU A 2
H3B H 0.3444 1.1616 0.4382 0.032 Uiso 0.343(5) 1 calc PR A 2
C4B C 0.363(2) 1.0123(14) 0.4409(6) 0.029(3) Uani 0.343(5) 1 d PDU A 2
H4B H 0.2438 1.0032 0.4427 0.034 Uiso 0.343(5) 1 calc PR A 2
C5B C 0.519(3) 0.9393(13) 0.4400(7) 0.035(3) Uani 0.343(5) 1 d PDU A 2
H5B H 0.5213 0.8738 0.4411 0.042 Uiso 0.343(5) 1 calc PR A 2
C12B C 0.1039(16) 0.926(2) 0.3357(7) 0.053(6) Uani 0.343(5) 1 d PDU A 2
H12D H 0.0366 0.8758 0.3339 0.080 Uiso 0.343(5) 1 calc PR A 2
H12E H 0.0504 0.9794 0.3148 0.080 Uiso 0.343(5) 1 calc PR A 2
H12F H 0.1015 0.9465 0.3676 0.080 Uiso 0.343(5) 1 calc PR A 2
C13B C 0.372(4) 0.8035(13) 0.3524(8) 0.043(5) Uani 0.343(5) 1 d PDU A 2
H13D H 0.2952 0.7572 0.3503 0.064 Uiso 0.343(5) 1 calc PR A 2
H13E H 0.3770 0.8210 0.3846 0.064 Uiso 0.343(5) 1 calc PR A 2
H13F H 0.4916 0.7767 0.3420 0.064 Uiso 0.343(5) 1 calc PR A 2
C14B C 0.313(3) 0.8578(13) 0.2711(4) 0.040(5) Uani 0.343(5) 1 d PDU A 2
H14D H 0.2411 0.8093 0.2678 0.061 Uiso 0.343(5) 1 calc PR A 2
H14E H 0.4371 0.8319 0.2645 0.061 Uiso 0.343(5) 1 calc PR A 2
H14F H 0.2698 0.9109 0.2491 0.061 Uiso 0.343(5) 1 calc PR A 2
C15B C 0.611(2) 1.0008(17) 0.2077(9) 0.053(3) Uani 0.343(5) 1 d PGDU A 2
H15B H 0.6250 0.9361 0.2167 0.064 Uiso 0.343(5) 1 calc PR A 2
C16B C 0.756(3) 1.0468(13) 0.1995(8) 0.052(3) Uani 0.343(5) 1 d PDU A 2
H16B H 0.8779 1.0196 0.1979 0.062 Uiso 0.343(5) 1 calc PR A 2
C17B C 0.676(2) 1.1427(13) 0.1943(7) 0.043(3) Uani 0.343(5) 1 d PDU A 2
H17B H 0.7379 1.1934 0.1906 0.052 Uiso 0.343(5) 1 calc PR A 2
C18B C 0.489(2) 1.1499(13) 0.1954(6) 0.046(3) Uani 0.343(5) 1 d PDU A 2
H18B H 0.4062 1.2072 0.1925 0.056 Uiso 0.343(5) 1 calc PR A 2
C19B C 0.444(3) 1.0600(12) 0.2013(13) 0.049(3) Uani 0.343(5) 1 d PDU A 2
H19B H 0.3294 1.0438 0.2009 0.059 Uiso 0.343(5) 1 calc PR A 2
C6 C 0.5981(6) 0.9521(4) 0.32163(16) 0.0321(13) Uani 1 1 d . A .
H6 H 0.6810 0.8903 0.3212 0.039 Uiso 1 1 calc R . .
C7 C 0.6487(7) 1.0396(4) 0.32022(17) 0.0375(14) Uani 1 1 d . A .
H7 H 0.7728 1.0513 0.3179 0.045 Uiso 1 1 calc R . .
C8 C 0.4934(7) 1.1083(4) 0.32115(16) 0.0355(14) Uani 1 1 d . A .
H8 H 0.4870 1.1776 0.3195 0.043 Uiso 1 1 calc R . .
C9 C 0.3479(7) 1.0618(4) 0.32300(16) 0.0308(13) Uani 1 1 d . A .
H9 H 0.2203 1.0932 0.3239 0.037 Uiso 1 1 calc R . .
C10 C 0.4098(7) 0.9650(3) 0.32301(16) 0.0260(12) Uani 1 1 d . A .
C11 C 0.2965(7) 0.8912(4) 0.32124(16) 0.0401(14) Uani 1 1 d DU . .
C20 C 0.6801(7) 0.9860(4) 0.08101(18) 0.0421(15) Uani 1 1 d . A .
H20 H 0.7606 0.9234 0.0812 0.051 Uiso 1 1 calc R . .
C21 C 0.7368(7) 1.0736(4) 0.07801(18) 0.0407(15) Uani 1 1 d . A .
H21 H 0.8614 1.0839 0.0744 0.049 Uiso 1 1 calc R . .
C22 C 0.5809(8) 1.1435(4) 0.07918(17) 0.0383(14) Uani 1 1 d . A .
H22 H 0.5760 1.2127 0.0768 0.046 Uiso 1 1 calc R . .
C23 C 0.4342(7) 1.0986(4) 0.08286(17) 0.0371(14) Uani 1 1 d . A .
H23 H 0.3075 1.1310 0.0845 0.045 Uiso 1 1 calc R . .
C24 C 0.4937(7) 1.0005(3) 0.08402(16) 0.0301(13) Uani 1 1 d . A .
C25 C 0.3777(7) 0.9272(4) 0.08511(18) 0.0481(15) Uani 1 1 d DU . .
C29 C 0.5716(7) 0.2882(3) 0.50574(16) 0.0271(12) Uani 1 1 d . . .
C30 C 0.8670(7) 0.1989(4) 0.51303(18) 0.0341(13) Uani 1 1 d . . .
C31 C 0.7561(6) 0.2852(3) 0.49816(15) 0.0261(12) Uani 1 1 d . . .
C32 C 0.8232(6) 0.3589(3) 0.47678(16) 0.0257(12) Uani 1 1 d . . .
C33 C 0.7076(6) 0.4443(3) 0.46194(16) 0.0274(12) Uani 1 1 d . . .
H33 H 0.5833 0.4506 0.4666 0.033 Uiso 1 1 calc R . .
C34 C 1.0100(6) 0.3522(3) 0.46899(15) 0.0235(11) Uani 1 1 d . . .
H34 H 1.0894 0.2961 0.4784 0.028 Uiso 1 1 calc R . .
C35 C 0.7731(6) 0.5160(3) 0.44134(15) 0.0260(12) Uani 1 1 d . . .
H35 H 0.6933 0.5718 0.4317 0.031 Uiso 1 1 calc R . .
C36 C 1.0745(6) 0.4240(3) 0.44860(15) 0.0255(12) Uani 1 1 d . . .
H36 H 1.1988 0.4174 0.4440 0.031 Uiso 1 1 calc R . .
C37 C 0.9602(6) 0.5105(3) 0.43356(15) 0.0220(11) Uani 1 1 d . . .
C38 C 1.0265(6) 0.5840(3) 0.41338(16) 0.0255(12) Uani 1 1 d . . .
C39 C 0.9180(7) 0.6719(4) 0.39801(18) 0.0321(13) Uani 1 1 d . . .
C40 C 1.2130(7) 0.5789(3) 0.40622(16) 0.0294(12) Uani 1 1 d . . .
C41 C 0.6016(7) 0.3240(3) 0.37865(16) 0.0253(12) Uani 1 1 d . . .
C42 C 0.8954(6) 0.2334(3) 0.38296(17) 0.0270(12) Uani 1 1 d . . .
C43 C 0.7853(6) 0.3192(3) 0.36963(16) 0.0243(11) Uani 1 1 d . . .
C44 C 0.8513(6) 0.3939(3) 0.34794(15) 0.0232(11) Uani 1 1 d . . .
C45 C 0.7365(6) 0.4794(3) 0.33413(15) 0.0216(11) Uani 1 1 d . . .
H45 H 0.6131 0.4863 0.3402 0.026 Uiso 1 1 calc R . .
C46 C 1.0352(6) 0.3877(3) 0.33894(15) 0.0240(11) Uani 1 1 d . . .
H46 H 1.1153 0.3318 0.3482 0.029 Uiso 1 1 calc R . .
C47 C 0.7990(6) 0.5509(3) 0.31260(15) 0.0232(11) Uani 1 1 d . . .
H47 H 0.7183 0.6067 0.3035 0.028 Uiso 1 1 calc R . .
C48 C 1.0992(6) 0.4592(3) 0.31756(15) 0.0242(11) Uani 1 1 d . . .
H48 H 1.2230 0.4527 0.3121 0.029 Uiso 1 1 calc R . .
C49 C 0.9829(6) 0.5448(3) 0.30309(15) 0.0247(12) Uani 1 1 d . . .
C50 C 1.0463(6) 0.6179(3) 0.27967(16) 0.0276(12) Uani 1 1 d . . .
C51 C 0.9311(7) 0.7026(4) 0.26481(17) 0.0326(13) Uani 1 1 d . . .
C52 C 1.2302(7) 0.6117(3) 0.26929(17) 0.0287(12) Uani 1 1 d . . .
C53 C 0.6276(7) 0.3482(3) 0.25260(16) 0.0261(12) Uani 1 1 d . . .
C54 C 0.9193(7) 0.2517(4) 0.25772(17) 0.0273(12) Uani 1 1 d . . .
C55 C 0.8138(6) 0.3398(3) 0.24239(15) 0.0242(11) Uani 1 1 d . . .
C56 C 0.8842(6) 0.4100(3) 0.21955(15) 0.0225(11) Uani 1 1 d . . .
C57 C 0.7747(6) 0.4972(3) 0.20359(16) 0.0251(12) Uani 1 1 d . . .
H57 H 0.6504 0.5069 0.2089 0.030 Uiso 1 1 calc R . .
C58 C 1.0699(6) 0.3992(3) 0.21079(15) 0.0239(11) Uani 1 1 d . . .
H58 H 1.1459 0.3425 0.2210 0.029 Uiso 1 1 calc R . .
C59 C 0.8450(6) 0.5654(3) 0.18129(15) 0.0239(11) Uani 1 1 d . . .
H59 H 0.7692 0.6223 0.1713 0.029 Uiso 1 1 calc R . .
C60 C 1.1411(6) 0.4672(3) 0.18842(15) 0.0250(12) Uani 1 1 d . . .
H60 H 1.2654 0.4575 0.1832 0.030 Uiso 1 1 calc R . .
C61 C 1.0313(6) 0.5540(3) 0.17243(15) 0.0211(11) Uani 1 1 d . . .
C62 C 1.1047(6) 0.6235(3) 0.14928(16) 0.0248(11) Uani 1 1 d . . .
C63 C 1.0016(7) 0.7115(4) 0.13394(18) 0.0343(13) Uani 1 1 d . . .
C64 C 1.2902(7) 0.6121(3) 0.13977(16) 0.0277(12) Uani 1 1 d . . .
C65 C 0.6812(7) 0.3618(3) 0.12366(16) 0.0278(12) Uani 1 1 d . . .
C66 C 0.9794(7) 0.2717(4) 0.12902(16) 0.0278(12) Uani 1 1 d . . .
C67 C 0.8660(6) 0.3572(3) 0.11318(16) 0.0261(12) Uani 1 1 d . . .
C68 C 0.9292(6) 0.4289(3) 0.08906(15) 0.0217(11) Uani 1 1 d . . .
C69 C 0.8128(6) 0.5134(3) 0.07354(16) 0.0277(12) Uani 1 1 d . . .
H69 H 0.6892 0.5202 0.0793 0.033 Uiso 1 1 calc R . .
C70 C 1.1144(6) 0.4215(3) 0.07897(16) 0.0272(12) Uani 1 1 d . . .
H70 H 1.1950 0.3660 0.0887 0.033 Uiso 1 1 calc R . .
C71 C 0.8756(6) 0.5834(3) 0.05092(16) 0.0277(12) Uani 1 1 d . . .
H71 H 0.7947 0.6389 0.0415 0.033 Uiso 1 1 calc R . .
C72 C 1.1762(6) 0.4918(3) 0.05596(15) 0.0283(12) Uani 1 1 d . . .
H72 H 1.2996 0.4847 0.0498 0.034 Uiso 1 1 calc R . .
C73 C 1.0601(6) 0.5773(3) 0.04056(16) 0.0271(12) Uani 1 1 d . . .
C74 C 1.1227(6) 0.6484(4) 0.01627(16) 0.0294(12) Uani 1 1 d . . .
C75 C 1.0106(7) 0.7335(4) -0.00013(18) 0.0352(14) Uani 1 1 d . . .
C76 C 1.3059(8) 0.6420(4) 0.00518(18) 0.0365(14) Uani 1 1 d . . .
Fe1 Fe 0.51155(10) 1.02212(5) 0.38092(2) 0.0277(2) Uani 1 1 d . . .
Fe2 Fe 0.60337(11) 1.06038(6) 0.13952(3) 0.0385(2) Uani 1 1 d . . .
N1 N 0.4245(6) 0.2876(3) 0.51219(15) 0.0375(11) Uani 1 1 d . . .
N2 N 0.9547(6) 0.1288(4) 0.52526(18) 0.0576(15) Uani 1 1 d . . .
N3 N 0.8380(6) 0.7422(3) 0.38594(17) 0.0487(13) Uani 1 1 d . . .
N4 N 1.3635(6) 0.5753(3) 0.40115(16) 0.0463(13) Uani 1 1 d . . .
N5 N 0.4530(6) 0.3256(3) 0.38644(15) 0.0369(11) Uani 1 1 d . . .
N6 N 0.9829(6) 0.1624(3) 0.39451(15) 0.0434(12) Uani 1 1 d . . .
N7 N 0.8389(6) 0.7707(3) 0.25286(16) 0.0472(13) Uani 1 1 d . . .
N8 N 1.3783(6) 0.6067(3) 0.26082(16) 0.0456(13) Uani 1 1 d . . .
N9 N 0.4818(6) 0.3496(3) 0.26104(15) 0.0375(11) Uani 1 1 d . . .
N10 N 0.9989(6) 0.1803(3) 0.26954(15) 0.0428(13) Uani 1 1 d . . .
N11 N 0.9253(6) 0.7829(3) 0.12114(18) 0.0564(15) Uani 1 1 d . . .
N12 N 1.4379(6) 0.6060(3) 0.13169(16) 0.0421(12) Uani 1 1 d . . .
N13 N 0.5368(6) 0.3623(3) 0.13273(15) 0.0395(12) Uani 1 1 d . . .
N14 N 1.0683(6) 0.2035(3) 0.14241(15) 0.0424(12) Uani 1 1 d . . .
N15 N 0.9232(7) 0.8014(4) -0.01382(18) 0.0599(15) Uani 1 1 d . . .
N16 N 1.4525(6) 0.6378(3) -0.00470(16) 0.0494(13) Uani 1 1 d . . .
 
loop_
 _atom_site_aniso_label
 _atom_site_aniso_U_11
 _atom_site_aniso_U_22
 _atom_site_aniso_U_33
 _atom_site_aniso_U_23
 _atom_site_aniso_U_13
 _atom_site_aniso_U_12
C26A 0.053(5) 0.063(6) 0.069(6) -0.007(5) -0.007(5) -0.038(5)
C27A 0.077(6) 0.045(5) 0.083(6) -0.007(5) 0.006(5) -0.022(5)
C28A 0.079(6) 0.059(5) 0.052(5) -0.018(4) -0.016(5) -0.026(5)
C1A 0.035(4) 0.034(4) 0.026(3) 0.008(3) -0.009(3) -0.014(3)
C2A 0.042(4) 0.034(4) 0.026(3) -0.003(4) -0.007(3) -0.015(4)
C3A 0.049(5) 0.034(4) 0.029(3) -0.002(3) -0.003(4) -0.006(4)
C4A 0.043(4) 0.042(5) 0.027(3) -0.009(4) 0.002(3) 0.002(4)
C5A 0.034(4) 0.044(4) 0.022(3) 0.005(3) 0.000(3) -0.016(4)
C12A 0.038(5) 0.072(6) 0.055(6) 0.011(6) -0.012(4) -0.033(5)
C13A 0.072(7) 0.043(6) 0.069(8) -0.002(5) 0.004(6) -0.023(5)
C14A 0.077(7) 0.078(7) 0.052(5) -0.004(5) -0.019(5) -0.050(6)
C15A 0.065(4) 0.055(4) 0.034(4) 0.012(4) -0.017(3) -0.020(4)
C16A 0.066(4) 0.055(5) 0.040(4) 0.003(4) -0.018(4) -0.029(4)
C17A 0.071(5) 0.055(4) 0.037(3) -0.006(3) -0.011(4) -0.021(4)
C18A 0.065(4) 0.067(4) 0.034(4) 0.000(4) -0.006(4) -0.023(4)
C19A 0.065(4) 0.059(4) 0.032(4) 0.009(4) -0.018(4) -0.036(4)
C26B 0.081(9) 0.085(9) 0.107(9) 0.006(8) -0.011(8) -0.025(7)
C27B 0.059(8) 0.048(7) 0.074(8) -0.001(7) 0.010(7) -0.040(6)
C28B 0.096(8) 0.085(8) 0.085(8) -0.018(7) 0.001(7) -0.035(7)
C1B 0.040(5) 0.037(5) 0.031(4) 0.002(5) -0.006(4) -0.011(5)
C2B 0.029(5) 0.033(5) 0.024(4) -0.004(4) -0.005(5) -0.014(5)
C3B 0.032(5) 0.031(5) 0.021(4) -0.001(4) 0.000(4) -0.013(5)
C4B 0.034(5) 0.031(5) 0.024(4) 0.004(5) 0.001(4) -0.015(5)
C5B 0.038(5) 0.037(5) 0.031(4) 0.007(4) -0.002(5) -0.008(5)
C12B 0.036(8) 0.066(8) 0.059(9) 0.010(8) -0.010(7) -0.020(7)
C13B 0.051(8) 0.037(8) 0.042(8) -0.002(7) 0.011(7) -0.016(6)
C14B 0.039(8) 0.041(8) 0.044(7) 0.009(6) -0.006(6) -0.017(6)
C15B 0.067(5) 0.059(5) 0.037(4) 0.008(4) -0.013(4) -0.025(4)
C16B 0.065(5) 0.055(5) 0.038(4) 0.002(5) -0.017(4) -0.020(5)
C17B 0.055(5) 0.049(5) 0.032(4) -0.004(4) -0.009(5) -0.023(5)
C18B 0.057(5) 0.052(5) 0.035(4) -0.005(4) -0.005(5) -0.021(5)
C19B 0.060(5) 0.059(5) 0.034(5) -0.001(5) -0.007(5) -0.029(4)
C6 0.029(3) 0.042(4) 0.025(3) -0.012(3) 0.004(2) -0.005(3)
C7 0.033(4) 0.051(4) 0.033(3) -0.003(3) 0.000(3) -0.019(3)
C8 0.058(4) 0.026(3) 0.026(3) 0.005(2) -0.006(3) -0.016(3)
C9 0.033(3) 0.035(3) 0.021(3) 0.005(2) -0.009(2) 0.000(3)
C10 0.034(3) 0.025(3) 0.020(3) 0.000(2) -0.001(2) -0.010(2)
C11 0.043(3) 0.044(3) 0.038(3) 0.006(3) -0.008(3) -0.021(3)
C20 0.040(4) 0.031(3) 0.050(4) 0.002(3) 0.009(3) 0.006(3)
C21 0.038(4) 0.046(4) 0.038(4) 0.012(3) -0.001(3) -0.012(3)
C22 0.059(4) 0.029(3) 0.030(3) 0.001(2) -0.008(3) -0.016(3)
C23 0.041(4) 0.032(3) 0.035(3) 0.000(3) -0.009(3) 0.002(3)
C24 0.041(4) 0.031(3) 0.018(3) -0.008(2) 0.001(2) -0.005(3)
C25 0.060(4) 0.041(3) 0.048(3) -0.014(3) 0.006(3) -0.019(3)
C29 0.035(3) 0.019(3) 0.026(3) -0.001(2) -0.004(2) -0.003(2)
C30 0.029(3) 0.039(4) 0.035(3) 0.007(3) 0.002(2) -0.009(3)
C31 0.026(3) 0.033(3) 0.020(3) -0.001(2) -0.004(2) -0.007(2)
C32 0.024(3) 0.030(3) 0.022(3) -0.005(2) -0.001(2) -0.002(2)
C33 0.023(3) 0.029(3) 0.030(3) -0.001(2) 0.001(2) -0.004(2)
C34 0.022(3) 0.025(3) 0.023(3) -0.005(2) -0.001(2) -0.001(2)
C35 0.030(3) 0.026(3) 0.020(3) -0.008(2) 0.000(2) 0.001(2)
C36 0.021(3) 0.033(3) 0.023(3) -0.004(2) -0.003(2) -0.006(2)
C37 0.022(3) 0.026(3) 0.019(3) -0.007(2) 0.001(2) -0.005(2)
C38 0.026(3) 0.026(3) 0.028(3) -0.009(2) -0.001(2) -0.012(2)
C39 0.032(3) 0.025(3) 0.042(3) -0.006(3) 0.006(3) -0.010(3)
C40 0.041(4) 0.025(3) 0.022(3) 0.000(2) -0.005(2) -0.006(3)
C41 0.030(3) 0.019(3) 0.026(3) 0.001(2) -0.007(2) -0.001(2)
C42 0.025(3) 0.026(3) 0.031(3) -0.004(2) 0.004(2) -0.005(2)
C43 0.026(3) 0.022(3) 0.024(3) -0.003(2) -0.003(2) -0.003(2)
C44 0.026(3) 0.025(3) 0.019(3) -0.006(2) -0.003(2) -0.005(2)
C45 0.018(3) 0.030(3) 0.019(3) -0.007(2) 0.000(2) -0.006(2)
C46 0.023(3) 0.028(3) 0.021(3) -0.004(2) -0.004(2) -0.001(2)
C47 0.026(3) 0.024(3) 0.019(3) -0.001(2) 0.001(2) -0.002(2)
C48 0.021(3) 0.029(3) 0.022(3) -0.006(2) 0.001(2) -0.004(2)
C49 0.028(3) 0.028(3) 0.020(3) -0.013(2) 0.001(2) -0.007(2)
C50 0.028(3) 0.027(3) 0.030(3) -0.008(2) 0.002(2) -0.008(2)
C51 0.042(4) 0.027(3) 0.032(3) -0.003(2) 0.009(3) -0.012(3)
C52 0.031(3) 0.027(3) 0.029(3) -0.005(2) 0.001(2) -0.006(3)
C53 0.028(3) 0.028(3) 0.023(3) 0.002(2) 0.000(2) -0.007(2)
C54 0.027(3) 0.027(3) 0.030(3) 0.001(2) -0.006(2) -0.012(3)
C55 0.025(3) 0.028(3) 0.021(3) -0.004(2) 0.001(2) -0.007(2)
C56 0.024(3) 0.024(3) 0.020(3) -0.006(2) -0.003(2) -0.003(2)
C57 0.019(3) 0.026(3) 0.029(3) -0.008(2) -0.003(2) -0.001(2)
C58 0.025(3) 0.027(3) 0.019(3) -0.002(2) -0.003(2) -0.002(2)
C59 0.020(3) 0.023(3) 0.026(3) -0.001(2) -0.006(2) 0.003(2)
C60 0.018(3) 0.029(3) 0.027(3) -0.005(2) -0.002(2) -0.003(2)
C61 0.020(3) 0.019(3) 0.023(3) -0.001(2) -0.001(2) -0.002(2)
C62 0.022(3) 0.024(3) 0.028(3) 0.002(2) -0.003(2) -0.002(2)
C63 0.034(3) 0.024(3) 0.047(4) 0.001(3) 0.004(3) -0.009(3)
C64 0.030(3) 0.025(3) 0.027(3) 0.006(2) -0.002(2) -0.004(2)
C65 0.040(4) 0.022(3) 0.024(3) 0.000(2) 0.000(2) -0.011(3)
C66 0.032(3) 0.027(3) 0.025(3) -0.006(2) 0.007(2) -0.005(3)
C67 0.029(3) 0.024(3) 0.026(3) -0.003(2) 0.000(2) -0.006(2)
C68 0.019(3) 0.024(3) 0.021(3) -0.005(2) -0.002(2) -0.002(2)
C69 0.018(3) 0.036(3) 0.028(3) -0.003(2) 0.000(2) -0.003(2)
C70 0.026(3) 0.028(3) 0.026(3) 0.001(2) 0.000(2) -0.002(2)
C71 0.026(3) 0.032(3) 0.024(3) -0.004(2) -0.003(2) 0.001(2)
C72 0.023(3) 0.036(3) 0.025(3) -0.002(2) -0.001(2) -0.003(2)
C73 0.030(3) 0.030(3) 0.021(3) -0.001(2) -0.002(2) -0.004(2)
C74 0.027(3) 0.035(3) 0.026(3) 0.002(2) 0.000(2) -0.008(3)
C75 0.036(4) 0.035(3) 0.035(3) 0.006(3) -0.002(3) -0.009(3)
C76 0.041(4) 0.039(4) 0.029(3) 0.007(3) -0.002(3) -0.009(3)
Fe1 0.0319(5) 0.0274(4) 0.0237(4) 0.0003(3) -0.0047(3) -0.0059(4)
Fe2 0.0490(6) 0.0438(5) 0.0271(5) 0.0043(4) -0.0091(4) -0.0216(4)
N1 0.030(3) 0.036(3) 0.046(3) -0.002(2) 0.003(2) -0.008(2)
N2 0.042(3) 0.052(4) 0.075(4) 0.021(3) -0.004(3) -0.005(3)
N3 0.045(3) 0.034(3) 0.065(4) -0.001(3) 0.001(3) -0.005(3)
N4 0.033(3) 0.050(3) 0.056(3) 0.000(3) -0.001(2) -0.012(3)
N5 0.031(3) 0.034(3) 0.044(3) 0.003(2) -0.001(2) -0.006(2)
N6 0.039(3) 0.040(3) 0.048(3) 0.006(2) 0.006(2) 0.000(2)
N7 0.052(3) 0.028(3) 0.059(3) 0.000(2) 0.006(3) -0.004(3)
N8 0.038(3) 0.048(3) 0.052(3) -0.001(2) 0.003(2) -0.014(3)
N9 0.033(3) 0.042(3) 0.040(3) 0.000(2) 0.000(2) -0.011(2)
N10 0.048(3) 0.032(3) 0.044(3) 0.001(2) -0.017(2) 0.001(2)
N11 0.046(3) 0.034(3) 0.087(4) 0.018(3) -0.001(3) -0.006(3)
N12 0.029(3) 0.039(3) 0.056(3) 0.008(2) 0.002(2) -0.006(2)
N13 0.032(3) 0.041(3) 0.047(3) 0.000(2) 0.001(2) -0.012(2)
N14 0.043(3) 0.030(3) 0.049(3) 0.002(2) 0.011(2) 0.005(2)
N15 0.065(4) 0.045(3) 0.067(4) 0.015(3) -0.014(3) -0.007(3)
N16 0.042(3) 0.056(3) 0.050(3) 0.007(3) 0.006(3) -0.012(3)
 
_geom_special_details
;
 All s.u.'s (except the s.u. in the dihedral angle between two l.s. planes)
 are estimated using the full covariance matrix.  The cell s.u.'s are taken
 into account individually in the estimation of s.u.'s in distances, angles
 and torsion angles; correlations between s.u.'s in cell parameters are only
 used when they are defined by crystal symmetry.  An approximate (isotropic)
 treatment of cell s.u.'s is used for estimating s.u.'s involving l.s. planes.
;
 
loop_
 _geom_bond_atom_site_label_1
 _geom_bond_atom_site_label_2
 _geom_bond_distance
 _geom_bond_site_symmetry_2
 _geom_bond_publ_flag
C26A C25 1.552(7) . ?
C26A H26A 0.9800 . ?
C26A H26B 0.9800 . ?
C26A H26C 0.9800 . ?
C27A C25 1.503(7) . ?
C27A H27A 0.9800 . ?
C27A H27B 0.9800 . ?
C27A H27C 0.9800 . ?
C28A C25 1.553(6) . ?
C28A H28A 0.9800 . ?
C28A H28B 0.9800 . ?
C28A H28C 0.9800 . ?
C1A C5A 1.393(8) . ?
C1A C2A 1.396(8) . ?
C1A Fe1 2.116(8) . ?
C1A H1A 0.9500 . ?
C2A C3A 1.391(8) . ?
C2A Fe1 2.101(9) . ?
C2A H2A 0.9500 . ?
C3A C4A 1.397(8) . ?
C3A Fe1 2.052(10) . ?
C3A H3A 0.9500 . ?
C4A C5A 1.389(8) . ?
C4A Fe1 2.064(10) . ?
C4A H4A 0.9500 . ?
C5A Fe1 2.113(9) . ?
C5A H5A 0.9500 . ?
C12A C11 1.540(7) . ?
C12A H12A 0.9800 . ?
C12A H12B 0.9800 . ?
C12A H12C 0.9800 . ?
C13A C11 1.536(7) . ?
C13A H13A 0.9800 . ?
C13A H13B 0.9800 . ?
C13A H13C 0.9800 . ?
C14A C11 1.545(7) . ?
C14A H14A 0.9800 . ?
C14A H14B 0.9800 . ?
C14A H14C 0.9800 . ?
C15A C19A 1.403(8) . ?
C15A C16A 1.409(8) . ?
C15A Fe2 2.140(9) . ?
C15A H15A 0.9500 . ?
C16A C17A 1.404(9) . ?
C16A Fe2 2.064(10) . ?
C16A H16A 0.9500 . ?
C17A C18A 1.410(9) . ?
C17A Fe2 2.031(11) . ?
C17A H17A 0.9500 . ?
C18A C19A 1.400(8) . ?
C18A Fe2 2.025(18) . ?
C18A H18A 0.9500 . ?
C19A Fe2 2.097(13) . ?
C19A H19A 0.9500 . ?
C26B C25 1.515(8) . ?
C26B H26D 0.9800 . ?
C26B H26E 0.9800 . ?
C26B H26F 0.9800 . ?
C27B C25 1.538(8) . ?
C27B H27D 0.9800 . ?
C27B H27E 0.9800 . ?
C27B H27F 0.9800 . ?
C28B C25 1.534(8) . ?
C28B H28D 0.9800 . ?
C28B H28E 0.9800 . ?
C28B H28F 0.9800 . ?
C1B C5B 1.447(13) . ?
C1B C2B 1.449(13) . ?
C1B Fe1 2.024(19) . ?
C1B H1B 0.9500 . ?
C2B C3B 1.446(13) . ?
C2B Fe1 2.111(18) . ?
C2B H2B 0.9500 . ?
C3B C4B 1.451(13) . ?
C3B Fe1 2.118(17) . ?
C3B H3B 0.9500 . ?
C4B C5B 1.446(13) . ?
C4B Fe1 2.078(18) . ?
C4B H4B 0.9500 . ?
C5B Fe1 2.03(2) . ?
C5B H5B 0.9500 . ?
C12B C11 1.534(8) . ?
C12B H12D 0.9800 . ?
C12B H12E 0.9800 . ?
C12B H12F 0.9800 . ?
C13B C11 1.540(8) . ?
C13B H13D 0.9800 . ?
C13B H13E 0.9800 . ?
C13B H13F 0.9800 . ?
C14B C11 1.547(8) . ?
C14B H14D 0.9800 . ?
C14B H14E 0.9800 . ?
C14B H14F 0.9800 . ?
C15B C19B 1.412(14) . ?
C15B C16B 1.413(14) . ?
C15B Fe2 2.10(3) . ?
C15B H15B 0.9500 . ?
C16B C17B 1.414(14) . ?
C16B Fe2 2.07(2) . ?
C16B H16B 0.9500 . ?
C17B C18B 1.420(13) . ?
C17B Fe2 2.17(2) . ?
C17B H17B 0.9500 . ?
C18B C19B 1.420(14) . ?
C18B Fe2 2.199(19) . ?
C18B H18B 0.9500 . ?
C19B Fe2 2.16(3) . ?
C19B H19B 0.9500 . ?
C6 C7 1.400(7) . ?
C6 C10 1.422(6) . ?
C6 Fe1 2.079(5) . ?
C6 H6 1.0000 . ?
C7 C8 1.405(7) . ?
C7 Fe1 2.066(5) . ?
C7 H7 1.0000 . ?
C8 C9 1.410(7) . ?
C8 Fe1 2.066(5) . ?
C8 H8 1.0000 . ?
C9 C10 1.400(6) . ?
C9 Fe1 2.084(5) . ?
C9 H9 1.0000 . ?
C10 C11 1.508(7) . ?
C10 Fe1 2.120(5) . ?
C20 C24 1.409(7) . ?
C20 C21 1.422(7) . ?
C20 Fe2 2.076(5) . ?
C20 H20 1.0000 . ?
C21 C22 1.419(7) . ?
C21 Fe2 2.061(5) . ?
C21 H21 1.0000 . ?
C22 C23 1.405(7) . ?
C22 Fe2 2.054(5) . ?
C22 H22 1.0000 . ?
C23 C24 1.413(7) . ?
C23 Fe2 2.077(5) . ?
C23 H23 1.0000 . ?
C24 C25 1.512(7) . ?
C24 Fe2 2.114(5) . ?
C29 N1 1.145(6) . ?
C29 C31 1.425(7) . ?
C30 N2 1.151(6) . ?
C30 C31 1.425(7) . ?
C31 C32 1.389(6) . ?
C32 C33 1.430(6) . ?
C32 C34 1.436(6) . ?
C33 C35 1.351(6) . ?
C33 H33 0.9500 . ?
C34 C36 1.345(6) . ?
C34 H34 0.9500 . ?
C35 C37 1.440(6) . ?
C35 H35 0.9500 . ?
C36 C37 1.440(6) . ?
C36 H36 0.9500 . ?
C37 C38 1.371(6) . ?
C38 C40 1.434(7) . ?
C38 C39 1.438(7) . ?
C39 N3 1.128(6) . ?
C40 N4 1.155(6) . ?
C41 N5 1.158(6) . ?
C41 C43 1.422(7) . ?
C42 N6 1.155(6) . ?
C42 C43 1.406(6) . ?
C43 C44 1.401(6) . ?
C44 C46 1.420(6) . ?
C44 C45 1.422(6) . ?
C45 C47 1.347(6) . ?
C45 H45 0.9500 . ?
C46 C48 1.352(6) . ?
C46 H46 0.9500 . ?
C47 C49 1.424(6) . ?
C47 H47 0.9500 . ?
C48 C49 1.433(6) . ?
C48 H48 0.9500 . ?
C49 C50 1.393(6) . ?
C50 C51 1.422(7) . ?
C50 C52 1.428(7) . ?
C51 N7 1.142(6) . ?
C52 N8 1.151(6) . ?
C53 N9 1.140(6) . ?
C53 C55 1.441(7) . ?
C54 N10 1.138(6) . ?
C54 C55 1.431(7) . ?
C55 C56 1.380(6) . ?
C56 C58 1.427(6) . ?
C56 C57 1.439(6) . ?
C57 C59 1.350(6) . ?
C57 H57 0.9500 . ?
C58 C60 1.351(6) . ?
C58 H58 0.9500 . ?
C59 C61 1.431(6) . ?
C59 H59 0.9500 . ?
C60 C61 1.435(6) . ?
C60 H60 0.9500 . ?
C61 C62 1.389(6) . ?
C62 C63 1.422(7) . ?
C62 C64 1.428(7) . ?
C63 N11 1.137(6) . ?
C64 N12 1.144(6) . ?
C65 N13 1.136(6) . ?
C65 C67 1.439(7) . ?
C66 N14 1.144(6) . ?
C66 C67 1.432(6) . ?
C67 C68 1.386(6) . ?
C68 C69 1.429(6) . ?
C68 C70 1.435(6) . ?
C69 C71 1.344(6) . ?
C69 H69 0.9500 . ?
C70 C72 1.349(6) . ?
C70 H70 0.9500 . ?
C71 C73 1.433(6) . ?
C71 H71 0.9500 . ?
C72 C73 1.438(6) . ?
C72 H72 0.9500 . ?
C73 C74 1.378(6) . ?
C74 C75 1.428(7) . ?
C74 C76 1.427(7) . ?
C75 N15 1.138(6) . ?
C76 N16 1.151(6) . ?
 
loop_
 _geom_angle_atom_site_label_1
 _geom_angle_atom_site_label_2
 _geom_angle_atom_site_label_3
 _geom_angle
 _geom_angle_site_symmetry_1
 _geom_angle_site_symmetry_3
 _geom_angle_publ_flag
C25 C26A H26A 109.5 . . ?
C25 C26A H26B 109.5 . . ?
H26A C26A H26B 109.5 . . ?
C25 C26A H26C 109.5 . . ?
H26A C26A H26C 109.5 . . ?
H26B C26A H26C 109.5 . . ?
C25 C27A H27A 109.5 . . ?
C25 C27A H27B 109.5 . . ?
H27A C27A H27B 109.5 . . ?
C25 C27A H27C 109.5 . . ?
H27A C27A H27C 109.5 . . ?
H27B C27A H27C 109.5 . . ?
C25 C28A H28A 109.5 . . ?
C25 C28A H28B 109.5 . . ?
H28A C28A H28B 109.5 . . ?
C25 C28A H28C 109.5 . . ?
H28A C28A H28C 109.5 . . ?
H28B C28A H28C 109.5 . . ?
C5A C1A C2A 108.1(7) . . ?
C5A C1A Fe1 70.6(5) . . ?
C2A C1A Fe1 70.1(5) . . ?
C5A C1A H1A 126.0 . . ?
C2A C1A H1A 126.0 . . ?
Fe1 C1A H1A 124.9 . . ?
C3A C2A C1A 107.4(8) . . ?
C3A C2A Fe1 68.5(5) . . ?
C1A C2A Fe1 71.3(5) . . ?
C3A C2A H2A 126.3 . . ?
C1A C2A H2A 126.3 . . ?
Fe1 C2A H2A 125.4 . . ?
C2A C3A C4A 108.8(8) . . ?
C2A C3A Fe1 72.3(5) . . ?
C4A C3A Fe1 70.6(5) . . ?
C2A C3A H3A 125.6 . . ?
C4A C3A H3A 125.6 . . ?
Fe1 C3A H3A 123.0 . . ?
C5A C4A C3A 107.3(8) . . ?
C5A C4A Fe1 72.5(5) . . ?
C3A C4A Fe1 69.7(5) . . ?
C5A C4A H4A 126.3 . . ?
C3A C4A H4A 126.3 . . ?
Fe1 C4A H4A 123.1 . . ?
C4A C5A C1A 108.4(8) . . ?
C4A C5A Fe1 68.7(5) . . ?
C1A C5A Fe1 70.9(5) . . ?
C4A C5A H5A 125.8 . . ?
C1A C5A H5A 125.8 . . ?
Fe1 C5A H5A 126.2 . . ?
C11 C12A H12A 109.5 . . ?
C11 C12A H12B 109.5 . . ?
H12A C12A H12B 109.5 . . ?
C11 C12A H12C 109.5 . . ?
H12A C12A H12C 109.5 . . ?
H12B C12A H12C 109.5 . . ?
C11 C13A H13A 109.5 . . ?
C11 C13A H13B 109.5 . . ?
H13A C13A H13B 109.5 . . ?
C11 C13A H13C 109.5 . . ?
H13A C13A H13C 109.5 . . ?
H13B C13A H13C 109.5 . . ?
C11 C14A H14A 109.5 . . ?
C11 C14A H14B 109.5 . . ?
H14A C14A H14B 109.5 . . ?
C11 C14A H14C 109.5 . . ?
H14A C14A H14C 109.5 . . ?
H14B C14A H14C 109.5 . . ?
C19A C15A C16A 106.8(9) . . ?
C19A C15A Fe2 69.0(6) . . ?
C16A C15A Fe2 67.5(5) . . ?
C19A C15A H15A 126.6 . . ?
C16A C15A H15A 126.6 . . ?
Fe2 C15A H15A 128.4 . . ?
C17A C16A C15A 110.5(9) . . ?
C17A C16A Fe2 68.7(6) . . ?
C15A C16A Fe2 73.4(5) . . ?
C17A C16A H16A 124.8 . . ?
C15A C16A H16A 124.8 . . ?
Fe2 C16A H16A 124.8 . . ?
C16A C17A C18A 104.9(10) . . ?
C16A C17A Fe2 71.2(6) . . ?
C18A C17A Fe2 69.4(9) . . ?
C16A C17A H17A 127.5 . . ?
C18A C17A H17A 127.5 . . ?
Fe2 C17A H17A 123.5 . . ?
C19A C18A C17A 110.3(10) . . ?
C19A C18A Fe2 72.9(9) . . ?
C17A C18A Fe2 69.9(8) . . ?
C19A C18A H18A 124.8 . . ?
C17A C18A H18A 124.8 . . ?
Fe2 C18A H18A 123.9 . . ?
C18A C19A C15A 107.5(10) . . ?
C18A C19A Fe2 67.4(9) . . ?
C15A C19A Fe2 72.4(6) . . ?
C18A C19A H19A 126.3 . . ?
C15A C19A H19A 126.3 . . ?
Fe2 C19A H19A 125.5 . . ?
C25 C26B H26D 109.5 . . ?
C25 C26B H26E 109.5 . . ?
H26D C26B H26E 109.5 . . ?
C25 C26B H26F 109.5 . . ?
H26D C26B H26F 109.5 . . ?
H26E C26B H26F 109.5 . . ?
C25 C27B H27D 109.5 . . ?
C25 C27B H27E 109.5 . . ?
H27D C27B H27E 109.5 . . ?
C25 C27B H27F 109.5 . . ?
H27D C27B H27F 109.5 . . ?
H27E C27B H27F 109.5 . . ?
C25 C28B H28D 109.5 . . ?
C25 C28B H28E 109.5 . . ?
H28D C28B H28E 109.5 . . ?
C25 C28B H28F 109.5 . . ?
H28D C28B H28F 109.5 . . ?
H28E C28B H28F 109.5 . . ?
C5B C1B C2B 108.8(15) . . ?
C5B C1B Fe1 69.2(10) . . ?
C2B C1B Fe1 72.7(10) . . ?
C5B C1B H1B 125.6 . . ?
C2B C1B H1B 125.6 . . ?
Fe1 C1B H1B 124.1 . . ?
C3B C2B C1B 107.2(15) . . ?
C3B C2B Fe1 70.3(10) . . ?
C1B C2B Fe1 66.3(10) . . ?
C3B C2B H2B 126.4 . . ?
C1B C2B H2B 126.4 . . ?
Fe1 C2B H2B 128.6 . . ?
C2B C3B C4B 108.4(14) . . ?
C2B C3B Fe1 69.7(10) . . ?
C4B C3B Fe1 68.3(10) . . ?
C2B C3B H3B 125.8 . . ?
C4B C3B H3B 125.8 . . ?
Fe1 C3B H3B 127.7 . . ?
C5B C4B C3B 108.1(14) . . ?
C5B C4B Fe1 67.5(10) . . ?
C3B C4B Fe1 71.3(10) . . ?
C5B C4B H4B 126.0 . . ?
C3B C4B H4B 126.0 . . ?
Fe1 C4B H4B 126.9 . . ?
C4B C5B C1B 107.4(15) . . ?
C4B C5B Fe1 71.3(10) . . ?
C1B C5B Fe1 69.0(11) . . ?
C4B C5B H5B 126.3 . . ?
C1B C5B H5B 126.3 . . ?
Fe1 C5B H5B 125.0 . . ?
C11 C12B H12D 109.5 . . ?
C11 C12B H12E 109.5 . . ?
H12D C12B H12E 109.5 . . ?
C11 C12B H12F 109.5 . . ?
H12D C12B H12F 109.5 . . ?
H12E C12B H12F 109.5 . . ?
C11 C13B H13D 109.5 . . ?
C11 C13B H13E 109.5 . . ?
H13D C13B H13E 109.5 . . ?
C11 C13B H13F 109.5 . . ?
H13D C13B H13F 109.5 . . ?
H13E C13B H13F 109.5 . . ?
C11 C14B H14D 109.5 . . ?
C11 C14B H14E 109.5 . . ?
H14D C14B H14E 109.5 . . ?
C11 C14B H14F 109.5 . . ?
H14D C14B H14F 109.5 . . ?
H14E C14B H14F 109.5 . . ?
C19B C15B C16B 114(2) . . ?
C19B C15B Fe2 72.7(19) . . ?
C16B C15B Fe2 69.1(14) . . ?
C19B C15B H15B 123.1 . . ?
C16B C15B H15B 123.1 . . ?
Fe2 C15B H15B 126.8 . . ?
C15B C16B C17B 104.2(19) . . ?
C15B C16B Fe2 71.4(14) . . ?
C17B C16B Fe2 74.3(12) . . ?
C15B C16B H16B 127.9 . . ?
C17B C16B H16B 127.9 . . ?
Fe2 C16B H16B 118.7 . . ?
C16B C17B C18B 108.2(17) . . ?
C16B C17B Fe2 66.8(12) . . ?
C18B C17B Fe2 72.2(11) . . ?
C16B C17B H17B 125.9 . . ?
C18B C17B H17B 125.9 . . ?
Fe2 C17B H17B 126.6 . . ?
C17B C18B C19B 110.8(17) . . ?
C17B C18B Fe2 69.9(11) . . ?
C19B C18B Fe2 69.3(16) . . ?
C17B C18B H18B 124.6 . . ?
C19B C18B H18B 124.6 . . ?
Fe2 C18B H18B 127.8 . . ?
C15B C19B C18B 102.3(19) . . ?
C15B C19B Fe2 68.6(17) . . ?
C18B C19B Fe2 72.6(14) . . ?
C15B C19B H19B 128.8 . . ?
C18B C19B H19B 128.8 . . ?
Fe2 C19B H19B 122.0 . . ?
C7 C6 C10 109.1(5) . . ?
C7 C6 Fe1 69.8(3) . . ?
C10 C6 Fe1 71.8(3) . . ?
C7 C6 H6 125.4 . . ?
C10 C6 H6 125.4 . . ?
Fe1 C6 H6 125.4 . . ?
C6 C7 C8 107.7(5) . . ?
C6 C7 Fe1 70.8(3) . . ?
C8 C7 Fe1 70.1(3) . . ?
C6 C7 H7 126.1 . . ?
C8 C7 H7 126.1 . . ?
Fe1 C7 H7 126.1 . . ?
C7 C8 C9 107.6(5) . . ?
C7 C8 Fe1 70.1(3) . . ?
C9 C8 Fe1 70.8(3) . . ?
C7 C8 H8 126.2 . . ?
C9 C8 H8 126.2 . . ?
Fe1 C8 H8 126.2 . . ?
C10 C9 C8 109.4(5) . . ?
C10 C9 Fe1 71.9(3) . . ?
C8 C9 Fe1 69.4(3) . . ?
C10 C9 H9 125.3 . . ?
C8 C9 H9 125.3 . . ?
Fe1 C9 H9 125.3 . . ?
C9 C10 C6 106.2(5) . . ?
C9 C10 C11 126.0(5) . . ?
C6 C10 C11 127.7(5) . . ?
C9 C10 Fe1 69.2(3) . . ?
C6 C10 Fe1 68.6(3) . . ?
C11 C10 Fe1 130.1(3) . . ?
C10 C11 C12B 112.9(13) . . ?
C10 C11 C13A 112.1(8) . . ?
C12B C11 C13A 121.0(13) . . ?
C10 C11 C13B 111.8(14) . . ?
C12B C11 C13B 108.1(16) . . ?
C13A C11 C13B 17.3(13) . . ?
C10 C11 C12A 109.6(7) . . ?
C12B C11 C12A 19.4(10) . . ?
C13A C11 C12A 108.3(8) . . ?
C13B C11 C12A 93.0(12) . . ?
C10 C11 C14A 107.9(5) . . ?
C12B C11 C14A 88.8(10) . . ?
C13A C11 C14A 111.1(8) . . ?
C13B C11 C14A 125.2(13) . . ?
C12A C11 C14A 107.8(7) . . ?
C10 C11 C14B 105.8(9) . . ?
C12B C11 C14B 113.0(12) . . ?
C13A C11 C14B 88.6(9) . . ?
C13B C11 C14B 105.0(13) . . ?
C12A C11 C14B 130.4(9) . . ?
C14A C11 C14B 26.4(8) . . ?
C24 C20 C21 109.9(5) . . ?
C24 C20 Fe2 71.8(3) . . ?
C21 C20 Fe2 69.3(3) . . ?
C24 C20 H20 125.1 . . ?
C21 C20 H20 125.1 . . ?
Fe2 C20 H20 125.1 . . ?
C22 C21 C20 106.4(5) . . ?
C22 C21 Fe2 69.6(3) . . ?
C20 C21 Fe2 70.5(3) . . ?
C22 C21 H21 126.8 . . ?
C20 C21 H21 126.8 . . ?
Fe2 C21 H21 126.8 . . ?
C23 C22 C21 108.1(5) . . ?
C23 C22 Fe2 71.0(3) . . ?
C21 C22 Fe2 70.1(3) . . ?
C23 C22 H22 125.9 . . ?
C21 C22 H22 125.9 . . ?
Fe2 C22 H22 125.9 . . ?
C22 C23 C24 109.4(5) . . ?
C22 C23 Fe2 69.2(3) . . ?
C24 C23 Fe2 71.7(3) . . ?
C22 C23 H23 125.3 . . ?
C24 C23 H23 125.3 . . ?
Fe2 C23 H23 125.3 . . ?
C20 C24 C23 106.2(5) . . ?
C20 C24 C25 127.5(5) . . ?
C23 C24 C25 126.2(5) . . ?
C20 C24 Fe2 68.9(3) . . ?
C23 C24 Fe2 68.9(3) . . ?
C25 C24 Fe2 129.7(3) . . ?
C27A C25 C24 114.1(6) . . ?
C27A C25 C26B 127.7(11) . . ?
C24 C25 C26B 115.7(10) . . ?
C27A C25 C28B 60.3(9) . . ?
C24 C25 C28B 102.0(9) . . ?
C26B C25 C28B 121.5(13) . . ?
C27A C25 C27B 39.9(7) . . ?
C24 C25 C27B 107.7(7) . . ?
C26B C25 C27B 108.1(12) . . ?
C28B C25 C27B 100.2(12) . . ?
C27A C25 C26A 109.5(7) . . ?
C24 C25 C26A 110.1(5) . . ?
C26B C25 C26A 37.0(9) . . ?
C28B C25 C26A 147.3(9) . . ?
C27B C25 C26A 76.0(8) . . ?
C27A C25 C28A 110.6(6) . . ?
C24 C25 C28A 106.2(5) . . ?
C26B C25 C28A 69.4(10) . . ?
C28B C25 C28A 57.6(9) . . ?
C27B C25 C28A 142.8(9) . . ?
C26A C25 C28A 106.1(6) . . ?
N1 C29 C31 177.8(6) . . ?
N2 C30 C31 179.2(6) . . ?
C32 C31 C29 123.1(4) . . ?
C32 C31 C30 122.4(5) . . ?
C29 C31 C30 114.4(5) . . ?
C31 C32 C33 120.8(4) . . ?
C31 C32 C34 121.3(4) . . ?
C33 C32 C34 117.9(5) . . ?
C35 C33 C32 120.7(5) . . ?
C35 C33 H33 119.6 . . ?
C32 C33 H33 119.6 . . ?
C36 C34 C32 121.1(4) . . ?
C36 C34 H34 119.5 . . ?
C32 C34 H34 119.5 . . ?
C33 C35 C37 122.0(4) . . ?
C33 C35 H35 119.0 . . ?
C37 C35 H35 119.0 . . ?
C34 C36 C37 121.8(4) . . ?
C34 C36 H36 119.1 . . ?
C37 C36 H36 119.1 . . ?
C38 C37 C35 121.9(4) . . ?
C38 C37 C36 121.6(4) . . ?
C35 C37 C36 116.5(4) . . ?
C37 C38 C40 121.8(5) . . ?
C37 C38 C39 123.7(5) . . ?
C40 C38 C39 114.5(4) . . ?
N3 C39 C38 177.6(6) . . ?
N4 C40 C38 178.9(6) . . ?
N5 C41 C43 178.2(6) . . ?
N6 C42 C43 178.5(6) . . ?
C44 C43 C42 122.4(4) . . ?
C44 C43 C41 122.3(4) . . ?
C42 C43 C41 115.3(4) . . ?
C43 C44 C46 121.6(4) . . ?
C43 C44 C45 121.2(4) . . ?
C46 C44 C45 117.2(4) . . ?
C47 C45 C44 121.4(4) . . ?
C47 C45 H45 119.3 . . ?
C44 C45 H45 119.3 . . ?
C48 C46 C44 121.8(4) . . ?
C48 C46 H46 119.1 . . ?
C44 C46 H46 119.1 . . ?
C45 C47 C49 121.7(4) . . ?
C45 C47 H47 119.2 . . ?
C49 C47 H47 119.2 . . ?
C46 C48 C49 120.9(4) . . ?
C46 C48 H48 119.6 . . ?
C49 C48 H48 119.6 . . ?
C50 C49 C47 121.5(4) . . ?
C50 C49 C48 121.5(4) . . ?
C47 C49 C48 117.0(4) . . ?
C49 C50 C51 121.7(4) . . ?
C49 C50 C52 121.8(5) . . ?
C51 C50 C52 116.5(5) . . ?
N7 C51 C50 179.8(7) . . ?
N8 C52 C50 179.8(6) . . ?
N9 C53 C55 176.2(6) . . ?
N10 C54 C55 177.8(6) . . ?
C56 C55 C54 122.8(4) . . ?
C56 C55 C53 123.1(4) . . ?
C54 C55 C53 114.0(4) . . ?
C55 C56 C58 121.3(4) . . ?
C55 C56 C57 121.8(4) . . ?
C58 C56 C57 116.9(4) . . ?
C59 C57 C56 121.3(4) . . ?
C59 C57 H57 119.3 . . ?
C56 C57 H57 119.3 . . ?
C60 C58 C56 122.0(4) . . ?
C60 C58 H58 119.0 . . ?
C56 C58 H58 119.0 . . ?
C57 C59 C61 121.4(4) . . ?
C57 C59 H59 119.3 . . ?
C61 C59 H59 119.3 . . ?
C58 C60 C61 120.8(4) . . ?
C58 C60 H60 119.6 . . ?
C61 C60 H60 119.6 . . ?
C62 C61 C59 121.9(4) . . ?
C62 C61 C60 120.7(4) . . ?
C59 C61 C60 117.5(4) . . ?
C61 C62 C63 122.5(4) . . ?
C61 C62 C64 122.2(4) . . ?
C63 C62 C64 115.3(4) . . ?
N11 C63 C62 177.3(6) . . ?
N12 C64 C62 177.7(6) . . ?
N13 C65 C67 177.5(6) . . ?
N14 C66 C67 178.7(6) . . ?
C68 C67 C66 122.6(4) . . ?
C68 C67 C65 122.8(4) . . ?
C66 C67 C65 114.6(4) . . ?
C67 C68 C69 121.4(4) . . ?
C67 C68 C70 121.2(4) . . ?
C69 C68 C70 117.4(4) . . ?
C71 C69 C68 121.0(4) . . ?
C71 C69 H69 119.5 . . ?
C68 C69 H69 119.5 . . ?
C72 C70 C68 121.2(5) . . ?
C72 C70 H70 119.4 . . ?
C68 C70 H70 119.4 . . ?
C69 C71 C73 122.4(5) . . ?
C69 C71 H71 118.8 . . ?
C73 C71 H71 118.8 . . ?
C70 C72 C73 121.7(5) . . ?
C70 C72 H72 119.2 . . ?
C73 C72 H72 119.2 . . ?
C74 C73 C71 122.0(5) . . ?
C74 C73 C72 121.7(5) . . ?
C71 C73 C72 116.3(5) . . ?
C73 C74 C75 123.1(5) . . ?
C73 C74 C76 122.2(5) . . ?
C75 C74 C76 114.7(5) . . ?
N15 C75 C74 178.8(7) . . ?
N16 C76 C74 178.5(6) . . ?
C1B Fe1 C5B 41.9(4) . . ?
C1B Fe1 C3A 52.8(6) . . ?
C5B Fe1 C3A 69.5(6) . . ?
C1B Fe1 C4A 68.6(6) . . ?
C5B Fe1 C4A 53.5(5) . . ?
C3A Fe1 C4A 39.7(2) . . ?
C1B Fe1 C7 113.2(6) . . ?
C5B Fe1 C7 142.3(6) . . ?
C3A Fe1 C7 123.1(4) . . ?
C4A Fe1 C7 158.8(4) . . ?
C1B Fe1 C8 139.8(7) . . ?
C5B Fe1 C8 177.8(6) . . ?
C3A Fe1 C8 110.1(3) . . ?
C4A Fe1 C8 124.8(3) . . ?
C7 Fe1 C8 39.8(2) . . ?
C1B Fe1 C4B 69.3(8) . . ?
C5B Fe1 C4B 41.2(4) . . ?
C3A Fe1 C4B 56.0(5) . . ?
C4A Fe1 C4B 18.8(4) . . ?
C7 Fe1 C4B 176.4(6) . . ?
C8 Fe1 C4B 136.7(6) . . ?
C1B Fe1 C6 114.3(6) . . ?
C5B Fe1 C6 114.9(6) . . ?
C3A Fe1 C6 157.3(4) . . ?
C4A Fe1 C6 161.0(4) . . ?
C7 Fe1 C6 39.47(19) . . ?
C8 Fe1 C6 66.3(2) . . ?
C4B Fe1 C6 142.5(5) . . ?
C1B Fe1 C9 179.5(7) . . ?
C5B Fe1 C9 138.7(7) . . ?
C3A Fe1 C9 127.1(3) . . ?
C4A Fe1 C9 111.6(3) . . ?
C7 Fe1 C9 66.4(2) . . ?
C8 Fe1 C9 39.72(19) . . ?
C4B Fe1 C9 111.1(5) . . ?
C6 Fe1 C9 65.7(2) . . ?
C1B Fe1 C2A 18.1(5) . . ?
C5B Fe1 C2A 56.1(6) . . ?
C3A Fe1 C2A 39.1(2) . . ?
C4A Fe1 C2A 65.9(4) . . ?
C7 Fe1 C2A 108.8(3) . . ?
C8 Fe1 C2A 125.1(3) . . ?
C4B Fe1 C2A 72.8(5) . . ?
C6 Fe1 C2A 122.9(3) . . ?
C9 Fe1 C2A 161.5(3) . . ?
C1B Fe1 C2B 41.0(4) . . ?
C5B Fe1 C2B 69.4(8) . . ?
C3A Fe1 C2B 17.5(4) . . ?
C4A Fe1 C2B 54.5(5) . . ?
C7 Fe1 C2B 111.8(5) . . ?
C8 Fe1 C2B 111.0(6) . . ?
C4B Fe1 C2B 68.2(7) . . ?
C6 Fe1 C2B 140.4(5) . . ?
C9 Fe1 C2B 138.8(6) . . ?
C2A Fe1 C2B 24.2(4) . . ?
C1B Fe1 C5A 54.7(6) . . ?
C5B Fe1 C5A 18.0(5) . . ?
C3A Fe1 C5A 65.2(4) . . ?
C4A Fe1 C5A 38.8(2) . . ?
C7 Fe1 C5A 159.7(4) . . ?
C8 Fe1 C5A 159.9(3) . . ?
C4B Fe1 C5A 23.8(4) . . ?
C6 Fe1 C5A 126.0(3) . . ?
C9 Fe1 C5A 125.8(3) . . ?
C2A Fe1 C5A 64.8(4) . . ?
C2B Fe1 C5A 70.8(5) . . ?
C18A Fe2 C17A 40.7(3) . . ?
C18A Fe2 C22 134.0(4) . . ?
C17A Fe2 C22 111.2(4) . . ?
C18A Fe2 C21 169.0(3) . . ?
C17A Fe2 C21 128.7(3) . . ?
C22 Fe2 C21 40.3(2) . . ?
C18A Fe2 C16A 66.1(5) . . ?
C17A Fe2 C16A 40.1(2) . . ?
C22 Fe2 C16A 119.8(3) . . ?
C21 Fe2 C16A 107.3(4) . . ?
C18A Fe2 C16B 60.3(7) . . ?
C17A Fe2 C16B 47.1(7) . . ?
C22 Fe2 C16B 135.9(5) . . ?
C21 Fe2 C16B 115.9(7) . . ?
C16A Fe2 C16B 16.8(5) . . ?
C18A Fe2 C20 150.8(3) . . ?
C17A Fe2 C20 165.2(3) . . ?
C22 Fe2 C20 66.8(2) . . ?
C21 Fe2 C20 40.2(2) . . ?
C16A Fe2 C20 126.9(3) . . ?
C16B Fe2 C20 123.3(7) . . ?
C18A Fe2 C23 114.7(4) . . ?
C17A Fe2 C23 122.8(3) . . ?
C22 Fe2 C23 39.78(19) . . ?
C21 Fe2 C23 67.1(2) . . ?
C16A Fe2 C23 154.6(3) . . ?
C16B Fe2 C23 169.6(6) . . ?
C20 Fe2 C23 65.8(2) . . ?
C18A Fe2 C19A 39.7(2) . . ?
C17A Fe2 C19A 67.9(4) . . ?
C22 Fe2 C19A 171.1(3) . . ?
C21 Fe2 C19A 147.3(3) . . ?
C16A Fe2 C19A 65.7(4) . . ?
C16B Fe2 C19A 50.4(6) . . ?
C20 Fe2 C19A 116.5(3) . . ?
C23 Fe2 C19A 132.6(3) . . ?
C18A Fe2 C15B 36.3(8) . . ?
C17A Fe2 C15B 57.6(7) . . ?
C22 Fe2 C15B 168.5(7) . . ?
C21 Fe2 C15B 147.3(6) . . ?
C16A Fe2 C15B 54.2(6) . . ?
C16B Fe2 C15B 39.6(4) . . ?
C20 Fe2 C15B 124.6(7) . . ?
C23 Fe2 C15B 141.8(5) . . ?
C19A Fe2 C15B 11.9(7) . . ?
C18A Fe2 C24 121.4(4) . . ?
C17A Fe2 C24 154.9(3) . . ?
C22 Fe2 C24 67.0(2) . . ?
C21 Fe2 C24 67.4(2) . . ?
C16A Fe2 C24 163.6(3) . . ?
C16B Fe2 C24 150.7(5) . . ?
C20 Fe2 C24 39.29(19) . . ?
C23 Fe2 C24 39.41(18) . . ?
C19A Fe2 C24 109.8(3) . . ?
C15B Fe2 C24 121.7(6) . . ?
C18A Fe2 C15A 65.7(5) . . ?
C17A Fe2 C15A 67.2(4) . . ?
C22 Fe2 C15A 150.0(3) . . ?
C21 Fe2 C15A 115.4(3) . . ?
C16A Fe2 C15A 39.1(2) . . ?
C16B Fe2 C15A 23.2(5) . . ?
C20 Fe2 C15A 106.7(3) . . ?
C23 Fe2 C15A 166.2(3) . . ?
C19A Fe2 C15A 38.7(2) . . ?
C15B Fe2 C15A 32.4(6) . . ?
C24 Fe2 C15A 127.6(3) . . ?
 
_diffrn_measured_fraction_theta_max    0.993
_diffrn_reflns_theta_full              25.35
_diffrn_measured_fraction_theta_full   0.993
_refine_diff_density_max    0.521
_refine_diff_density_min   -0.397
_refine_diff_density_rms    0.074
 
data_9-Me2F0
 
_audit_creation_method            SHELXL-97
_chemical_name_systematic
;
 ?
;
_chemical_name_common             ?
_chemical_melting_point           ?
_chemical_formula_moiety          ?
_chemical_formula_sum
 'C36 H22 Fe N8'
_chemical_formula_weight          622.47
 
loop_
 _atom_type_symbol
 _atom_type_description
 _atom_type_scat_dispersion_real
 _atom_type_scat_dispersion_imag
 _atom_type_scat_source
 'C'  'C'   0.0033   0.0016
 'International Tables Vol C Tables 4.2.6.8 and 6.1.1.4'
 'H'  'H'   0.0000   0.0000
 'International Tables Vol C Tables 4.2.6.8 and 6.1.1.4'
 'N'  'N'   0.0061   0.0033
 'International Tables Vol C Tables 4.2.6.8 and 6.1.1.4'
 'Fe'  'Fe'   0.3463   0.8444
 'International Tables Vol C Tables 4.2.6.8 and 6.1.1.4'
 
_symmetry_cell_setting           'Triclinic'
_symmetry_space_group_name_H-M   'P -1'
_symmetry_space_group_name_Hall    '-P 1'
loop_
 _symmetry_equiv_pos_as_xyz
 'x, y, z'
 '-x, -y, -z'
 
_cell_length_a                    7.5255(6)
_cell_length_b                    7.6535(6)
_cell_length_c                    13.4176(11)
_cell_angle_alpha                 101.755(2)
_cell_angle_beta                  93.869(2)
_cell_angle_gamma                 94.593(2)
_cell_volume                      751.38(10)
_cell_formula_units_Z             1
_cell_measurement_temperature     273
_cell_measurement_reflns_used     3250
_cell_measurement_theta_min       2.73
_cell_measurement_theta_max       28.22
_exptl_crystal_description        'plate'
_exptl_crystal_colour             'dark-green'
_exptl_crystal_size_max           0.40
_exptl_crystal_size_mid           0.30
_exptl_crystal_size_min           0.10
_exptl_crystal_density_meas       ?
_exptl_crystal_density_diffrn     1.376
_exptl_crystal_density_method     'not measured'
_exptl_crystal_F_000              320
_exptl_absorpt_coefficient_mu     0.542
_exptl_absorpt_correction_type    empirical
_exptl_absorpt_correction_T_min   0.8123
_exptl_absorpt_correction_T_max   0.9478
_exptl_absorpt_process_details    
;
SADABS Sheldrick 1996
;
_exptl_special_details
;
 ?
;
 
_diffrn_ambient_temperature       273
_diffrn_radiation_wavelength      0.71073
_diffrn_radiation_type            MoK\a
_diffrn_radiation_source          'Bruker TXS fine-focus rotating anode' 
_diffrn_radiation_monochromator   'Bruker Helios multilayer confocal mirror' 
_diffrn_measurement_device_type   'Bruker APEXII CCD area detector' 
_diffrn_measurement_method        'phi and omega scans' 
_diffrn_detector_area_resol_mean  8.333
_diffrn_standards_number          ?
_diffrn_standards_interval_count  ?
_diffrn_standards_interval_time   ?
_diffrn_standards_decay_%         ?
_diffrn_reflns_number             5633
_diffrn_reflns_av_R_equivalents   0.0154
_diffrn_reflns_av_unetI/netI     0.0318
_diffrn_reflns_limit_h_min        -9
_diffrn_reflns_limit_h_max        9
_diffrn_reflns_limit_k_min        -9
_diffrn_reflns_limit_k_max        10
_diffrn_reflns_limit_l_min        -17
_diffrn_reflns_limit_l_max        17
_diffrn_reflns_theta_min          1.56
_diffrn_reflns_theta_max          28.32
_reflns_number_total              3679
_reflns_number_gt                 3354
_reflns_threshold_expression      >2\s(I)
 
_computing_data_collection        'APEX2 (Bruker AXS, 2006)'
_computing_cell_refinement        'APEX2 (Bruker AXS, 2006)'
_computing_data_reduction         'SAINT (Bruker AXS, 2004)'
_computing_structure_solution     'SHELXS-97 (Sheldrick, 1997)'
_computing_structure_refinement   'SHELXL-97 (Sheldrick, 1997)'
_computing_molecular_graphics     'XSHEL (Bruker AXS,2002)'
_computing_publication_material   'XCIF (Bruker AXS, 2001)' 
_refine_special_details
;
 Refinement of F^2^ against ALL reflections.  The weighted R-factor wR and
 goodness of fit S are based on F^2^, conventional R-factors R are based
 on F, with F set to zero for negative F^2^. The threshold expression of
 F^2^ > 2\s(F^2^) is used only for calculating R-factors(gt) etc. and is
 not relevant to the choice of reflections for refinement.  R-factors based
 on F^2^ are statistically about twice as large as those based on F, and R-
 factors based on ALL data will be even larger.
 During the refinement, the restraint command 'SIMU' and 'ISOR' were used to 
 refine the non-H atoms with NPD and ADP problems. These atoms are as follows: 
 C1A C2A C3A C4A C5A C6A C7A C1B C2B C3B C4B C5B C6B C7B
;
 
_refine_ls_structure_factor_coef  Fsqd
_refine_ls_matrix_type            full
_refine_ls_weighting_scheme       calc
_refine_ls_weighting_details
 'calc w=1/[\s^2^(Fo^2^)+(0.0668P)^2^+0.1598P] where P=(Fo^2^+2Fc^2^)/3'
_atom_sites_solution_primary      direct
_atom_sites_solution_secondary    difmap
_atom_sites_solution_hydrogens    geom
_refine_ls_hydrogen_treatment     constr

_refine_ls_extinction_method      none
_refine_ls_extinction_coef        ?
_refine_ls_number_reflns          3679
_refine_ls_number_parameters      282
_refine_ls_number_restraints      277
_refine_ls_R_factor_all           0.0476
_refine_ls_R_factor_gt            0.0434
_refine_ls_wR_factor_ref          0.1173
_refine_ls_wR_factor_gt           0.1133
_refine_ls_goodness_of_fit_ref    1.062
_refine_ls_restrained_S_all       1.050
_refine_ls_shift/su_max           0.000
_refine_ls_shift/su_mean          0.000
 
loop_
 _atom_site_label
 _atom_site_type_symbol
 _atom_site_fract_x
 _atom_site_fract_y
 _atom_site_fract_z
 _atom_site_U_iso_or_equiv
 _atom_site_adp_type
 _atom_site_occupancy
 _atom_site_symmetry_multiplicity
 _atom_site_calc_flag
 _atom_site_refinement_flags
 _atom_site_disorder_assembly
 _atom_site_disorder_group
C1A C 0.0124(10) 0.7215(11) -0.0350(6) 0.0450(13) Uani 0.560(7) 1 d PU A 1
C2A C 0.1236(8) 0.7966(7) 0.0546(5) 0.0500(11) Uani 0.560(7) 1 d PU A 1
H2A H 0.2460 0.7880 0.0632 0.060 Uiso 0.560(7) 1 calc PR A 1
C3A C 0.0223(10) 0.8855(6) 0.1283(4) 0.0554(11) Uani 0.560(7) 1 d PU A 1
H3A H 0.0638 0.9484 0.1936 0.066 Uiso 0.560(7) 1 calc PR A 1
C4A C -0.1581(9) 0.8614(8) 0.0839(6) 0.0527(14) Uani 0.560(7) 1 d PU A 1
H4A H -0.2562 0.9036 0.1165 0.063 Uiso 0.560(7) 1 calc PR A 1
C5A C -0.1636(7) 0.7643(7) -0.0166(5) 0.0515(12) Uani 0.560(7) 1 d PU A 1
H5A H -0.2645 0.7334 -0.0628 0.062 Uiso 0.560(7) 1 calc PR A 1
C6A C 0.114(3) 0.6187(15) -0.1191(12) 0.054(3) Uani 0.307(17) 1 d PU A 1
H6A1 H 0.2387 0.6280 -0.0960 0.081 Uiso 0.307(17) 1 calc PR A 1
H6A2 H 0.1002 0.6686 -0.1789 0.081 Uiso 0.307(17) 1 calc PR A 1
H6A3 H 0.0673 0.4949 -0.1352 0.081 Uiso 0.307(17) 1 calc PR A 1
C7A C 0.033(3) 0.6114(15) -0.1390(11) 0.057(3) Uani 0.263(18) 1 d PU A 1
H7A1 H 0.1561 0.5895 -0.1446 0.085 Uiso 0.263(18) 1 calc PR A 1
H7A2 H -0.0046 0.6750 -0.1902 0.085 Uiso 0.263(18) 1 calc PR A 1
H7A3 H -0.0395 0.4991 -0.1488 0.085 Uiso 0.263(18) 1 calc PR A 1
C1B C 0.0643(12) 0.7317(14) -0.0152(8) 0.0451(16) Uani 0.440(7) 1 d PU A 2
C2B C 0.0776(10) 0.8249(9) 0.0871(6) 0.0461(13) Uani 0.440(7) 1 d PU A 2
H2B H 0.1820 0.8459 0.1307 0.055 Uiso 0.440(7) 1 calc PR A 2
C3B C -0.0873(14) 0.8813(9) 0.1141(5) 0.0503(15) Uani 0.440(7) 1 d PU A 2
H3B H -0.1128 0.9442 0.1776 0.060 Uiso 0.440(7) 1 calc PR A 2
C4B C -0.2068(9) 0.8247(10) 0.0270(8) 0.0571(15) Uani 0.440(7) 1 d PU A 2
H4B H -0.3271 0.8444 0.0224 0.069 Uiso 0.440(7) 1 calc PR A 2
C5B C -0.1156(13) 0.7334(9) -0.0525(6) 0.0569(15) Uani 0.440(7) 1 d PU A 2
H5B H -0.1650 0.6826 -0.1185 0.068 Uiso 0.440(7) 1 calc PR A 2
C6B C 0.263(3) 0.683(3) -0.0388(19) 0.063(4) Uani 0.161(12) 1 d PU A 2
H6B1 H 0.2623 0.6194 -0.1084 0.095 Uiso 0.161(12) 1 calc PR A 2
H6B2 H 0.3046 0.6094 0.0062 0.095 Uiso 0.161(12) 1 calc PR A 2
H6B3 H 0.3421 0.7915 -0.0284 0.095 Uiso 0.161(12) 1 calc PR A 2
C7B C 0.194(3) 0.6441(16) -0.0819(15) 0.059(3) Uani 0.268(14) 1 d PU A 2
H7B1 H 0.1349 0.5938 -0.1485 0.089 Uiso 0.268(14) 1 calc PR A 2
H7B2 H 0.2407 0.5505 -0.0531 0.089 Uiso 0.268(14) 1 calc PR A 2
H7B3 H 0.2899 0.7310 -0.0875 0.089 Uiso 0.268(14) 1 calc PR A 2
Fe1 Fe 0.0000 1.0000 0.0000 0.04037(13) Uani 1 2 d S . .
C8 C 0.5305(2) 0.6669(2) 0.25438(13) 0.0412(4) Uani 1 1 d . . .
C9 C 0.8220(2) 0.7243(2) 0.34895(13) 0.0388(3) Uani 1 1 d . . .
C10 C 0.6381(2) 0.7599(2) 0.34412(12) 0.0336(3) Uani 1 1 d . . .
C11 C 0.57023(18) 0.87911(18) 0.42110(11) 0.0301(3) Uani 1 1 d . . .
C12 C 0.38484(18) 0.91339(19) 0.41447(11) 0.0319(3) Uani 1 1 d . . .
H12 H 0.3096 0.8546 0.3577 0.038 Uiso 1 1 calc R . .
C13 C 0.68128(18) 0.97067(19) 0.51080(12) 0.0320(3) Uani 1 1 d . . .
H13 H 0.8010 0.9495 0.5174 0.038 Uiso 1 1 calc R . .
C14 C 0.68090(18) 0.4738(2) 0.51272(12) 0.0325(3) Uani 1 1 d . . .
H14 H 0.8012 0.4554 0.5210 0.039 Uiso 1 1 calc R . .
C15 C 0.39060(18) 0.41142(19) 0.41333(11) 0.0320(3) Uani 1 1 d . . .
H15 H 0.3183 0.3516 0.3556 0.038 Uiso 1 1 calc R . .
C16 C 0.57521(18) 0.38093(19) 0.42262(11) 0.0304(3) Uani 1 1 d . . .
C17 C 0.64862(19) 0.26024(19) 0.34639(11) 0.0322(3) Uani 1 1 d . . .
C18 C 0.8309(2) 0.2242(2) 0.35465(12) 0.0372(3) Uani 1 1 d . . .
C19 C 0.5461(2) 0.1647(2) 0.25647(13) 0.0386(3) Uani 1 1 d . . .
N1 N 0.4463(3) 0.5910(3) 0.18228(14) 0.0632(5) Uani 1 1 d . . .
N2 N 0.9681(2) 0.6939(3) 0.35065(15) 0.0576(4) Uani 1 1 d . . .
N3 N 0.9761(2) 0.1897(3) 0.35869(14) 0.0551(4) Uani 1 1 d . . .
N4 N 0.4678(2) 0.0843(3) 0.18322(13) 0.0592(4) Uani 1 1 d . . .
 
loop_
 _atom_site_aniso_label
 _atom_site_aniso_U_11
 _atom_site_aniso_U_22
 _atom_site_aniso_U_33
 _atom_site_aniso_U_23
 _atom_site_aniso_U_13
 _atom_site_aniso_U_12
C1A 0.058(3) 0.0325(17) 0.045(3) 0.0098(17) 0.009(2) 0.002(2)
C2A 0.055(2) 0.044(2) 0.057(3) 0.019(2) 0.007(2) 0.0146(17)
C3A 0.080(3) 0.046(2) 0.043(2) 0.0141(16) 0.006(2) 0.004(2)
C4A 0.058(3) 0.044(2) 0.061(4) 0.017(3) 0.025(2) 0.004(2)
C5A 0.055(3) 0.038(2) 0.060(3) 0.012(2) 0.002(2) -0.0068(18)
C6A 0.072(6) 0.040(3) 0.050(5) 0.002(3) 0.017(5) 0.009(5)
C7A 0.079(7) 0.039(4) 0.051(5) 0.004(3) 0.018(5) 0.002(4)
C1B 0.057(4) 0.033(2) 0.050(4) 0.015(2) 0.014(3) 0.009(3)
C2B 0.058(3) 0.039(3) 0.042(3) 0.013(2) 0.000(2) 0.005(2)
C3B 0.069(4) 0.040(2) 0.044(3) 0.012(2) 0.016(3) 0.001(3)
C4B 0.055(3) 0.050(3) 0.069(4) 0.020(3) 0.007(3) -0.004(2)
C5B 0.072(4) 0.040(2) 0.053(3) 0.005(2) -0.006(3) -0.011(3)
C6B 0.068(7) 0.060(6) 0.064(7) 0.014(5) 0.015(6) 0.015(5)
C7B 0.065(6) 0.047(4) 0.066(6) 0.010(4) 0.015(5) 0.007(4)
Fe1 0.0453(2) 0.03225(18) 0.0457(2) 0.01229(13) 0.00727(14) 0.00324(13)
C8 0.0438(9) 0.0373(8) 0.0424(9) 0.0069(7) 0.0048(7) 0.0069(7)
C9 0.0366(8) 0.0364(8) 0.0431(8) 0.0067(6) 0.0065(6) 0.0040(6)
C10 0.0321(7) 0.0312(7) 0.0380(8) 0.0088(6) 0.0028(6) 0.0020(5)
C11 0.0274(7) 0.0279(6) 0.0366(7) 0.0117(5) 0.0013(5) 0.0005(5)
C12 0.0265(6) 0.0326(7) 0.0358(7) 0.0086(6) -0.0035(5) -0.0004(5)
C13 0.0236(6) 0.0340(7) 0.0394(7) 0.0117(6) -0.0009(5) 0.0019(5)
C14 0.0233(6) 0.0344(7) 0.0397(8) 0.0088(6) -0.0010(5) 0.0022(5)
C15 0.0260(6) 0.0326(7) 0.0358(7) 0.0064(6) -0.0033(5) -0.0004(5)
C16 0.0270(7) 0.0292(7) 0.0358(7) 0.0093(5) 0.0018(5) 0.0009(5)
C17 0.0288(7) 0.0323(7) 0.0354(7) 0.0071(6) 0.0020(5) 0.0021(5)
C18 0.0346(8) 0.0360(8) 0.0400(8) 0.0051(6) 0.0050(6) 0.0027(6)
C19 0.0369(8) 0.0382(8) 0.0405(8) 0.0067(6) 0.0035(6) 0.0057(6)
N1 0.0657(11) 0.0618(11) 0.0534(10) -0.0035(8) -0.0084(8) 0.0063(9)
N2 0.0385(8) 0.0641(10) 0.0687(11) 0.0074(8) 0.0079(7) 0.0102(7)
N3 0.0350(8) 0.0640(10) 0.0635(10) 0.0047(8) 0.0033(7) 0.0100(7)
N4 0.0561(10) 0.0628(11) 0.0499(9) -0.0044(8) -0.0066(8) 0.0049(8)
 
_geom_special_details
;
 All s.u.'s (except the s.u. in the dihedral angle between two l.s. planes)
 are estimated using the full covariance matrix.  The cell s.u.'s are taken
 into account individually in the estimation of s.u.'s in distances, angles
 and torsion angles; correlations between s.u.'s in cell parameters are only
 used when they are defined by crystal symmetry.  An approximate (isotropic)
 treatment of cell s.u.'s is used for estimating s.u.'s involving l.s. planes.
;
 
loop_
 _geom_bond_atom_site_label_1
 _geom_bond_atom_site_label_2
 _geom_bond_distance
 _geom_bond_site_symmetry_2
 _geom_bond_publ_flag
C1A C2A 1.408(8) . ?
C1A C5A 1.416(9) . ?
C1A C7A 1.501(13) . ?
C1A C6A 1.525(12) . ?
C2A C3A 1.390(7) . ?
C2A H2A 0.9300 . ?
C3A C4A 1.428(8) . ?
C3A H3A 0.9300 . ?
C4A C5A 1.396(8) . ?
C4A H4A 0.9300 . ?
C5A H5A 0.9300 . ?
C6A H6A1 0.9600 . ?
C6A H6A2 0.9600 . ?
C6A H6A3 0.9600 . ?
C7A H7A1 0.9600 . ?
C7A H7A2 0.9600 . ?
C7A H7A3 0.9600 . ?
C1B C2B 1.405(11) . ?
C1B C5B 1.413(10) . ?
C1B C7B 1.476(14) . ?
C1B C6B 1.61(2) . ?
C2B C3B 1.393(10) . ?
C2B H2B 0.9300 . ?
C3B C4B 1.397(10) . ?
C3B H3B 0.9300 . ?
C4B C5B 1.404(10) . ?
C4B H4B 0.9300 . ?
C5B H5B 0.9300 . ?
C6B H6B1 0.9600 . ?
C6B H6B2 0.9600 . ?
C6B H6B3 0.9600 . ?
C7B H7B1 0.9600 . ?
C7B H7B2 0.9600 . ?
C7B H7B3 0.9600 . ?
C8 N1 1.142(2) . ?
C8 C10 1.428(2) . ?
C9 N2 1.141(2) . ?
C9 C10 1.431(2) . ?
C10 C11 1.387(2) . ?
C11 C13 1.437(2) . ?
C11 C12 1.4404(19) . ?
C12 C13 1.348(2) 2_676 ?
C12 H12 0.9300 . ?
C13 C12 1.348(2) 2_676 ?
C13 H13 0.9300 . ?
C14 C15 1.356(2) 2_666 ?
C14 C16 1.424(2) . ?
C14 H14 0.9300 . ?
C15 C14 1.356(2) 2_666 ?
C15 C16 1.4285(19) . ?
C15 H15 0.9300 . ?
C16 C17 1.406(2) . ?
C17 C19 1.418(2) . ?
C17 C18 1.422(2) . ?
C18 N3 1.145(2) . ?
C19 N4 1.144(2) . ?
 
loop_
 _geom_angle_atom_site_label_1
 _geom_angle_atom_site_label_2
 _geom_angle_atom_site_label_3
 _geom_angle
 _geom_angle_site_symmetry_1
 _geom_angle_site_symmetry_3
 _geom_angle_publ_flag
C2A C1A C5A 107.5(6) . . ?
C2A C1A C7A 137.1(12) . . ?
C5A C1A C7A 115.4(11) . . ?
C2A C1A C6A 112.6(12) . . ?
C5A C1A C6A 139.9(12) . . ?
C7A C1A C6A 24.5(6) . . ?
C3A C2A C1A 109.5(6) . . ?
C3A C2A H2A 125.2 . . ?
C1A C2A H2A 125.2 . . ?
C2A C3A C4A 106.5(5) . . ?
C2A C3A H3A 126.8 . . ?
C4A C3A H3A 126.8 . . ?
C5A C4A C3A 109.0(5) . . ?
C5A C4A H4A 125.5 . . ?
C3A C4A H4A 125.5 . . ?
C4A C5A C1A 107.4(5) . . ?
C4A C5A H5A 126.3 . . ?
C1A C5A H5A 126.3 . . ?
C1A C6A H6A1 109.5 . . ?
C1A C6A H6A2 109.5 . . ?
H6A1 C6A H6A2 109.5 . . ?
C1A C6A H6A3 109.5 . . ?
H6A1 C6A H6A3 109.5 . . ?
H6A2 C6A H6A3 109.5 . . ?
C1A C7A H7A1 109.5 . . ?
C1A C7A H7A2 109.5 . . ?
H7A1 C7A H7A2 109.5 . . ?
C1A C7A H7A3 109.5 . . ?
H7A1 C7A H7A3 109.5 . . ?
H7A2 C7A H7A3 109.5 . . ?
C2B C1B C5B 105.8(8) . . ?
C2B C1B C7B 133.4(13) . . ?
C5B C1B C7B 120.8(13) . . ?
C2B C1B C6B 105.9(12) . . ?
C5B C1B C6B 148.1(13) . . ?
C7B C1B C6B 27.7(8) . . ?
C3B C2B C1B 110.5(7) . . ?
C3B C2B H2B 124.7 . . ?
C1B C2B H2B 124.7 . . ?
C2B C3B C4B 106.5(6) . . ?
C2B C3B H3B 126.7 . . ?
C4B C3B H3B 126.7 . . ?
C3B C4B C5B 108.9(8) . . ?
C3B C4B H4B 125.6 . . ?
C5B C4B H4B 125.6 . . ?
C4B C5B C1B 108.3(8) . . ?
C4B C5B H5B 125.9 . . ?
C1B C5B H5B 125.9 . . ?
C1B C6B H6B1 109.5 . . ?
C1B C6B H6B2 109.5 . . ?
H6B1 C6B H6B2 109.5 . . ?
C1B C6B H6B3 109.5 . . ?
H6B1 C6B H6B3 109.5 . . ?
H6B2 C6B H6B3 109.5 . . ?
C1B C7B H7B1 109.5 . . ?
C1B C7B H7B2 109.5 . . ?
H7B1 C7B H7B2 109.5 . . ?
C1B C7B H7B3 109.5 . . ?
H7B1 C7B H7B3 109.5 . . ?
H7B2 C7B H7B3 109.5 . . ?
N1 C8 C10 179.05(19) . . ?
N2 C9 C10 178.50(19) . . ?
C11 C10 C8 122.39(14) . . ?
C11 C10 C9 121.92(14) . . ?
C8 C10 C9 115.68(14) . . ?
C10 C11 C13 121.31(13) . . ?
C10 C11 C12 121.00(13) . . ?
C13 C11 C12 117.69(13) . . ?
C13 C12 C11 121.06(13) 2_676 . ?
C13 C12 H12 119.5 2_676 . ?
C11 C12 H12 119.5 . . ?
C12 C13 C11 121.25(13) 2_676 . ?
C12 C13 H13 119.4 2_676 . ?
C11 C13 H13 119.4 . . ?
C15 C14 C16 121.23(13) 2_666 . ?
C15 C14 H14 119.4 2_666 . ?
C16 C14 H14 119.4 . . ?
C14 C15 C16 121.10(13) 2_666 . ?
C14 C15 H15 119.5 2_666 . ?
C16 C15 H15 119.5 . . ?
C17 C16 C14 121.31(13) . . ?
C17 C16 C15 121.01(13) . . ?
C14 C16 C15 117.67(13) . . ?
C16 C17 C19 122.49(13) . . ?
C16 C17 C18 122.24(13) . . ?
C19 C17 C18 115.27(13) . . ?
N3 C18 C17 177.56(18) . . ?
N4 C19 C17 177.82(18) . . ?
 
_diffrn_measured_fraction_theta_max    0.985
_diffrn_reflns_theta_full              28.32
_diffrn_measured_fraction_theta_full   0.985
_refine_diff_density_max    0.841
_refine_diff_density_min   -0.260
_refine_diff_density_rms    0.067
